# Supplementary material for: Appropriateness, Reasons and Independent Predictors of Consultations in the Emergency Department (ED) of a Dutch Tertiary Care Center: A Prospective Cohort Study
Source: PLoS One. 2016 Feb 19;11(2):e0149079. doi: 10.1371/journal.pone.0149079 (PMC4760948; doi:10.1371/journal.pone.0149079)
Supplement: S1 Database — (XLSX) [file pone.0149079.s001.xlsx]

## Sheet: Blad1
#ID	Age	Sex	Pediatrics	Referral status	Way of arrival	Triage category	Treating physician	Treating physician	Triage complaint	Myocardial history	Vascular History	Pulmonary history	Neurologic history	Renal history	Liver history	Gastro-intestinal history	Malignancy history	Miscellaneous history	Charlson Comorbidity Index	Charlson category	Return visit <48H	Return visit <7d	Multidisciplinary resuscitation	Consultation	Number of consultations	Consult 1	Consulted specialist 1	Consultation reason 1	Consultation reason 1.1	Consult appropriate 1	Consult 2	Consulting specialist 2	Consulted specialist 2	Consultation reason 2	Consultation reasons 2.1	Consult appropriate 2	Consult 3	Consulting specialist 3	Consulted specialist 3	Consultation reason 3	Consultation reason 3.1	Consult appropriate 3	Disposition	Day of departure	Length of stay (minutes)
1	68	female	yes	self-refferal	ambulatory	yellow	cardiology	specialist	palpitations	yes	no	no	no	no	no	no	no	no	0	low	yes	yes	no	no	0	no					no						no						outpatient follow-up	same	185
2	57	male	yes	self-refferal	ambulance	yellow	ED physician	ED phycisian	traumatic injury	no	yes	no	no	no	no	no	no	no	0	low	no	no	no	no	0	no					no						no						home	same	85
3	58	male	yes	general practitioner	ambulatory	green	internal medicine	specialist	traumatic injury	no	no	no	no	no	no	no	no	no	0	low	no	no	no	yes	1	yes	surgery	specific procedure	operation	yes	no						no						admission ward	same	191
4	72	male	yes	specialist	ambulatory	green	internal medicine	specialist	dyspnea	no	no	no	no	no	no	no	yes	yes	7	high	no	no	no	no	0	no					no						no						admission ward	same	190
5	58	female	yes	self-refferal	ambulance	orange	ED physician	ED phycisian	traumatic injury	no	yes	yes	no	no	no	no	no	no	1	low	no	no	yes	no	0	no					no						no						home	same	253
6	16	male	no	self-refferal	ambulatory	blue	ED physician	ED phycisian	traumatic injury	no	no	no	no	no	no	no	no	no	0	low	no	no	no	no	0	no					no						no						home	same	34
7	75	male	yes	general practitioner	ambulatory	green	ED physician	ED phycisian	traumatic injury	yes	no	yes	no	no	no	no	yes	no	3	low	no	no	no	no	0	no					no						no						home	same	25
8	75	female	yes	general practitioner	ambulance	yellow	neurology	specialist	malaise	no	no	no	yes	no	no	no	no	no	2	low	no	no	no	yes	1	yes	internal medicine	other		no	no						no						home	same	454
9	10	female	no	self-refferal	ambulatory	yellow	ED physician	ED phycisian	other	no	no	no	no	no	no	no	no	no	0	low	no	no	no	yes	1	yes	surgery	pre-existing agreement		yes	no						no						outpatient follow-up	same	209
10	13	male	no	self-refferal	ambulatory	yellow	ED physician	ED phycisian	other	no	no	no	no	no	no	no	no	no	0	low	no	no	no	no	0	no					no						no						home	same	51
11	44	male	yes	self-refferal	ambulance	orange	ED physician	ED phycisian	chest pain	no	yes	no	no	no	no	no	no	no	1	low	no	no	no	yes	1	yes	cardiology	exclusion diagnosis	ACS	no	no						no						home	same	143
12	52	male	yes	specialist	ambulatory	yellow	cardiology	specialist	palpitations	yes	no	no	no	no	no	no	no	no	0	low	no	no	no	yes	1	yes	emergency physician	pre-existing agreement	cardioversion	yes	no						no						outpatient follow-up	same	234
13	63	female	yes	specialist	ambulatory	yellow	internal medicine	specialist	malaise	no	no	no	no	no	no	no	yes	no	6	high	no	no	no	no	0	no					no						no						admission ward	same	360
14	7	female	no	specialist	ambulatory	green	ED physician	ED phycisian	traumatic injury	no	no	no	no	no	no	no	no	no	0	low	no	no	no	no	0	no					no						no						outpatient follow-up	same	46
15	56	female	yes	self-refferal	ambulatory	orange	ED physician	ED phycisian	other	no	yes	no	no	no	no	no	no	no	0	low	no	no	no	yes	1	yes	other	specific procedure	fiber endoscopy	yes	no						no						home	same	80
16	43	male	yes	general practitioner	ambulatory	yellow	internal medicine	specialist	malaise	no	no	no	no	no	no	no	no	no	0	low	no	no	no	no	0	no					no						no						outpatient follow-up	same	243
17	69	female	yes	self-refferal	ambulatory	orange	ED physician	ED phycisian	chest pain	yes	no	yes	no	no	no	no	no	yes	3	low	no	no	no	no	0	no					no						no						home	same	218
18	87	male	yes	general practitioner	ambulatory	yellow	other	specialist	dyspnea	yes	yes	no	no	yes	no	no	yes	no	7	high	no	no	no	no	0	no					no						no						outpatient follow-up	same	461
19	70	female	yes	general practitioner	ambulance	orange	ED physician	ED phycisian	dyspnea	no	yes	yes	no	no	no	no	no	no	2	low	no	no	no	yes	1	yes	other	admission department		yes	no						no						admission ward	same	175
20	74	female	yes	self-refferal	ambulance	yellow	ED physician	ED phycisian	malaise	no	yes	no	yes	no	no	no	no	no	1	low	no	no	yes	no	0	no					no						no						admission ward	same	10
21	18	female	yes	self-refferal	ambulatory	yellow	ED physician	ED phycisian	other	no	no	no	no	no	no	no	no	no	0	low	no	no	no	no	0	no					no						no						home	same
22	70	female	yes	specialist	ambulatory	yellow	ED physician	ED phycisian	traumatic injury	yes	no	no	no	no	no	no	no	no	1	low	no	no	no	no	0	no					no						no						outpatient follow-up	same	97
23	44	male	yes	self-refferal	ambulance	yellow	ED physician	ED phycisian	abdominal pain	no	no	no	no	no	no	no	no	no	0	low	no	no	no	no	0	no					no						no						home	same
24	31	female	yes	self-refferal	ambulance	yellow	ED physician	ED phycisian	other	no	yes	no	yes	no	no	no	no	yes	3	low	no	no	yes	no	0	no					no						no						admission ward	same
25	59	female	yes	general practitioner	ambulance	red	ED physician	ED phycisian	dyspnea	no	yes	no	no	no	no	no	no	no	1	low	no	no	yes	no	0	no					no						no						admission ICU	same	75
26	81	male	yes	self-refferal	ambulatory	yellow	ED physician	ED phycisian	chest pain	yes	yes	no	no	no	no	no	no	yes	2	low	no	no	no	no	0	no					no						no						home	same	157
27	72	male	yes	specialist	ambulance	red	ED physician	ED phycisian	traumatic injury	yes	no	no	no	no	no	no	yes	no	4	high	no	no	yes	no	0	no					no						no						admission ICU	same	58
28	89	female	yes	general practitioner	ambulance	orange	neurology	specialist	other	no	no	no	no	no	no	no	no	no	0	low	no	no	no	yes	1	yes	cardiology	exclusion diagnosis	ACS	yes	no						no						admission ward	same	377
29	62	female	yes	general practitioner	ambulatory	green	surgery	specialist	traumatic injury	no	no	no	no	no	no	no	yes	no	2	low	no	no	no	no	0	no					no						no						outpatient follow-up	same	280
30	1	male	no	self-refferal	ambulatory	green	ED physician	ED phycisian	dyspnea	no	no	no	no	no	no	no	no	no	0	low	no	no	no	yes	1	yes	other	uncertainty diagnosis		yes	no						no						home	same	236
31	86	female	yes	general practitioner	ambulance	yellow	neurology	specialist	malaise	no	no	no	no	no	no	no	no	no	1	low	no	no	no	no	0	no					no						no						admission ward	same	220
32	52	female	yes	general practitioner	ambulance	orange	ED physician	ED phycisian	chest pain	no	no	no	no	no	no	no	no	no	0	low	no	no	no	yes	1	yes	cardiology	exclusion diagnosis	ACS	yes	no						no						admission ward	same	142
33	31	male	yes	general practitioner	ambulatory	green	internal medicine	specialist	traumatic injury	no	no	no	no	no	no	no	no	no	0	low	no	no	no	no	0	no					no						no						home	same
34	86	male	yes	self-refferal	ambulance	yellow	ED physician	ED phycisian	other	no	no	no	no	no	no	no	no	no	0	low	no	no	no	yes	1	yes	internal medicine	admission department		yes	no						no						admission ward	same	193
35	0	female	no	specialist	ambulance	yellow	other	specialist	malaise	yes	yes	no	yes	no	no	no	no	no	2	low	no	no	no	no	0	no					no						no						outpatient follow-up	same	241
36	47	male	yes	general practitioner	ambulatory	yellow	other	specialist	other	no	no	no	no	no	no	no	no	no	0	low	no	no	no	no	0	no					no						no						outpatient follow-up	same	84
37	59	female	yes	self-refferal	ambulance	yellow	ED physician	ED phycisian	abdominal pain	no	no	no	no	no	no	yes	no	no	0	low	no	no	no	no	0	no					no						no						home	same	133
38	15	female	no	general practitioner	ambulatory	green	other	specialist	malaise	no	no	yes	no	no	no	no	no	no	1	low	no	no	no	no	0	no					no						no						home	same	83
39	34	female	yes	specialist	ambulatory	green	ED physician	ED phycisian	traumatic injury	no	no	yes	no	no	no	no	no	yes	1	low	no	no	no	no	0	no					no						no						outpatient follow-up	same	53
40	2	male	no	general practitioner	ambulatory	yellow	ED physician	ED phycisian	abdominal pain	no	no	no	no	no	no	no	no	no	0	low	no	no	no	no	0	no					no						no						home	same	134
41	16	female	no	self-refferal	ambulatory	yellow	ED physician	ED phycisian	other	no	no	no	no	no	no	no	no	no	0	low	no	no	no	yes	1	yes	other	specific procedure		yes	no						no						outpatient follow-up	same	129
42	1	female	no	self-refferal	ambulance	orange	ED physician	ED phycisian	traumatic injury	no	no	no	no	no	no	no	no	no	0	low	yes	yes	yes	no	0	no					no						no						admission ward	same	128
43	13	male	no	self-refferal	ambulatory	yellow	ED physician	ED phycisian	traumatic injury	no	no	no	no	no	no	no	no	no	0	low	no	no	no	no	0	no					no						no						outpatient follow-up	same	124
44	23	male	yes	self-refferal	ambulatory	orange	ED physician	ED phycisian	chest pain	no	no	no	no	no	no	no	no	no	0	low	no	no	no	no	0	no					no						no						outpatient follow-up	same	143
45	80	male	yes	self-refferal	ambulatory	yellow	ED physician	ED phycisian	other	yes	no	no	no	no	no	no	yes	no	1	low	no	no	no	yes	1	yes	cardiology	other		yes	no						no						admission ward	same	230
46	79	male	yes	specialist	ambulance	yellow	other	specialist	malaise	no	no	no	no	no	no	no	no	no	0	low	no	no	no	no	0	no					no						no						admission ward	same	32
47	19	female	yes	self-refferal	ambulance	yellow	ED physician	ED phycisian	collaps	no	no	no	no	no	no	no	no	no	0	low	no	no	no	no	0	no					no						no						home	same	196
48	53	male	yes	general practitioner	ambulatory	yellow	ED physician	ED phycisian	other	yes	no	no	no	no	no	no	no	no	1	low	no	no	no	yes	1	yes	internal medicine	specific procedure	GI endoscopy	yes	no						no						admission ward	same	153
49	67	male	yes	general practitioner	ambulatory	yellow	internal medicine	specialist	malaise	yes	yes	no	no	no	no	no	no	no	1	low	no	no	no	yes	1	yes	surgery	specific procedure		yes	no						no						admission ward	same	274
50	14	female	no	self-refferal	ambulance	orange	ED physician	ED phycisian	other	no	no	no	no	no	no	no	no	no	0	low	no	no	no	yes	1	yes	other	admission department		no	no						no						home	same	176
51	33	male	yes	self-refferal	ambulatory	orange	ED physician	ED phycisian	traumatic injury	no	no	no	no	no	no	no	no	no	0	low	no	no	no	no	0	no					no						no						home	same	22
52	14	male	no	specialist	ambulatory	green	ED physician	ED phycisian	traumatic injury	no	no	yes	no	no	no	no	no	no	1	low	no	no	no	no	0	no					no						no						outpatient follow-up	same	39
53	66	male	yes	self-refferal	ambulatory	green	ED physician	ED phycisian	traumatic injury	no	no	no	no	no	no	no	no	no	2	low	no	no	no	no	0	no					no						no						home	same	-93
54	33	male	yes	self-refferal	ambulance	green	ED physician	ED phycisian	traumatic injury	no	no	no	no	no	no	no	no	no	0	low	no	no	no	no	0	no					no						no						home	same	32
55	6	male	no	self-refferal	ambulance	green	ED physician	ED phycisian	traumatic injury	no	yes	no	no	yes	no	no	no	no	4	high	no	no	no	no	0	no					no						no						outpatient follow-up	same	206
56	43	male	yes	general practitioner	ambulance	yellow	internal medicine	specialist	chest pain	no	no	no	no	no	no	no	yes	no	2	low	no	yes	no	no	0	no					no						no						home	same	159
57	67	female	yes	specialist	ambulance	yellow	neurology	specialist	traumatic injury	yes	yes	no	no	no	no	no	yes	no	8	high	no	no	no	no	0	no					no						no						admission ward	same	138
58	1	male	no	self-refferal	ambulatory	red	ED physician	ED phycisian	dyspnea	no	no	no	no	no	no	no	no	no	0	low	no	no	no	yes	1	yes	other	admission department		no	no						no						home	same	222
59	52	female	yes	self-refferal	ambulatory	yellow	ED physician	ED phycisian	traumatic injury	no	no	no	no	no	no	no	no	no	0	low	no	no	no	no	0	no					no						no						home	same	75
60	43	male	yes	self-refferal	ambulatory	yellow	ED physician	ED phycisian	other	no	no	no	no	no	no	no	no	no	0	low	no	no	no	no	0	no					no						no						home	same	91
61	28	male	yes	specialist	ambulatory	green	ED physician	ED phycisian	traumatic injury	no	no	no	no	no	no	no	no	no	0	low	no	no	no	no	0	no					no						no						outpatient follow-up	same	46
62	51	male	yes	self-refferal	ambulatory	green	ED physician	ED phycisian	traumatic injury	no	no	no	no	no	no	no	no	no	1	low	yes	yes	no	no	0	no					no						no						home	same	99
63	78	female	yes	general practitioner	ambulatory	yellow	ED physician	ED phycisian	other	yes	yes	no	no	no	no	no	no	no	0	low	no	no	no	no	0	no					no						no						home	same	120
64	77	male	yes	general practitioner	ambulatory	orange	cardiology	specialist	dyspnea	yes	yes	no	no	no	no	no	yes	yes	4	high	no	no	no	no	0	no					no						no						outpatient follow-up	same	131
65	51	male	yes	general practitioner	ambulatory	yellow	neurology	specialist	other	no	no	no	no	no	no	no	no	no	0	low	no	no	no	no	0	no					no						no						home	same	125
66	32	female	yes	general practitioner	ambulatory	yellow	other	specialist	other	no	no	no	no	no	no	no	no	no	0	low	no	no	no	no	0	no					no						no						admission ward	same	97
67	43	male	yes	general practitioner	ambulatory	green	internal medicine	specialist	abdominal pain	yes	no	no	no	no	no	no	no	no	1	low	no	no	no	no	0	no					no						no						admission ward	same	184
68	22	male	yes	general practitioner	ambulatory	orange	ED physician	ED phycisian	traumatic injury	no	no	no	no	no	no	no	no	no	0	low	no	no	no	no	0	no					no						no						outpatient follow-up	same	33
69	59	male	yes	general practitioner	ambulatory	green	internal medicine	specialist	other	yes	yes	no	no	yes	no	no	no	yes	5	high	no	no	no	yes	1	yes	surgery	specific procedure		no	no						no						outpatient follow-up	same
70	43	female	yes	self-refferal	ambulatory	yellow	ED physician	ED phycisian	other	no	no	no	no	no	no	no	no	no	0	low	no	no	no	no	0	no					no						no						outpatient follow-up	same
71	59	male	yes	general practitioner	ambulatory	green	ED physician	ED phycisian	abdominal pain	no	no	no	no	no	no	no	no	no	0	low	no	no	no	yes	1	yes	surgery	admission department		yes	no						no						admission ward	same
72	84	female	yes	self-refferal	ambulance	orange	ED physician	ED phycisian	other	no	no	no	yes	no	no	no	no	no	1	low	no	no	yes	no	0	no					no						no						admission ICU	next
73	63	male	yes	general practitioner	ambulatory	green	neurology	specialist	other	no	no	no	no	no	no	no	yes	no	2	low	no	no	no	no	0	no					no						no						home	same	126
74	90	male	yes	general practitioner	ambulatory	yellow	internal medicine	specialist	malaise	no	yes	no	no	no	no	no	no	yes	0	low	no	no	no	no	0	no					no						no						admission ward	same	228
75	63	male	yes	general practitioner	ambulatory	yellow	internal medicine	specialist	other	no	yes	no	no	no	no	no	no	no	0	low	no	no	no	no	0	no					no						no						home	same	208
76	2	male	no	general practitioner	ambulatory	yellow	other	specialist	malaise	no	no	no	yes	no	no	no	yes	yes	2	low	no	no	no	no	0	no					no						no						outpatient follow-up	same	132
77	51	male	yes	self-refferal	ambulatory	yellow	ED physician	ED phycisian	traumatic injury	no	no	no	no	no	no	no	no	no	1	low	no	no	no	no	0	no					no						no						home	same	43
78	35	female	yes	self-refferal	ambulance	orange	ED physician	ED phycisian	abdominal pain	no	no	no	no	no	no	no	no	no	0	low	no	no	no	yes	1	yes	surgery	specific procedure		yes	no						no						admission ward	same
79	86	male	yes	general practitioner	ambulance	yellow	other	specialist	malaise	yes	no	yes	no	no	no	no	yes	no	5	high	no	no	no	yes	1	yes	internal medicine	other		yes	no						no						admission ward	same
80	63	male	yes	general practitioner	ambulatory	yellow	cardiology	specialist	chest pain	yes	no	no	no	no	no	no	no	no	0	low	no	no	no	no	0	no					no						no						admission ward	same	148
81	93	male	yes	self-refferal	ambulance	orange	cardiology	specialist	dyspnea	yes	no	no	no	no	no	no	no	no	0	low	no	no	no	no	0	no					no						no						admission ward	same	202
82	77	male	yes	self-refferal	ambulatory	yellow	ED physician	ED phycisian	collaps	no	yes	no	no	no	no	no	no	no	1	low	no	no	no	no	0	no					no						no						home	same	125
83	85	female	yes	general practitioner	ambulance	orange	ED physician	ED phycisian	malaise	no	yes	no	no	no	no	no	yes	yes	4	high	no	no	yes	no	0	no					no						no						outpatient follow-up	same	132
84	65	male	yes	general practitioner	ambulance	orange	ED physician	ED phycisian	chest pain	no	no	no	no	no	no	no	no	no	0	low	no	no	no	no	0	no					no						no						home	same	202
85	80	female	yes	general practitioner	ambulance	yellow	internal medicine	specialist	other	no	yes	yes	no	no	no	no	yes	no	6	high	no	no	no	no	0	no					no						no						admission ward	same	195
86	60	male	yes	general practitioner	ambulance	yellow	ED physician	ED phycisian	traumatic injury	yes	no	no	no	no	no	no	yes	no	2	low	no	no	no	yes	1	yes	surgery	other		yes	no						no						outpatient follow-up	same
87	45	male	yes	self-refferal	ambulance	yellow	ED physician	ED phycisian	other	no	no	no	no	no	no	no	no	no	0	low	no	no	yes	no	0	no					no						no						home	same	92
88	17	female	yes	self-refferal	ambulatory	green	ED physician	ED phycisian	traumatic injury	no	no	no	no	no	no	no	no	no	0	low	no	no	no	no	0	no					no						no						home	same	34
89	33	female	yes	self-refferal	ambulatory	yellow	ED physician	ED phycisian	traumatic injury	no	no	no	no	no	no	no	no	no	0	low	no	no	no	no	0	no					no						no						home	same	69
90	41	female	yes	self-refferal	ambulatory	green	ED physician	ED phycisian	traumatic injury	no	no	no	no	no	no	no	no	no	0	low	no	no	no	no	0	no					no						no						home	same	73
91	34	male	yes	specialist	ambulatory	yellow	neurology	specialist	other	no	no	no	no	no	no	no	yes	no	2	low	no	no	no	no	0	no					no						no						home	same	190
92	84	male	yes	general practitioner	ambulance	yellow	internal medicine	specialist	other	no	yes	no	no	no	no	no	no	no	2	low	no	no	no	no	0	no					no						no						home	same	226
93	19	female	yes	self-refferal	ambulance	yellow	ED physician	ED phycisian	collaps	no	no	no	no	no	no	no	no	no	0	low	no	no	yes	no	0	no					no						no						home	same	136
94	55	female	yes	specialist	ambulance	orange	internal medicine	specialist	other	yes	no	no	no	no	yes	no	yes	no	6	high	no	no	no	yes	2	yes	neurology	other		yes	no	internal medicine	intensive care	admission IC		yes	no						admission ICU	same	373
95	34	female	yes	specialist	ambulatory	yellow	ED physician	ED phycisian	dyspnea	no	no	no	no	no	no	no	no	no	0	low	no	no	no	no	0	no					no						no						home	same	182
96	61	female	yes	specialist	ambulatory	yellow	ED physician	ED phycisian	traumatic injury	no	no	no	no	no	no	no	no	no	0	low	no	no	no	no	0	no					no						no						outpatient follow-up	same	113
97	42	male	yes	self-refferal	ambulatory	yellow	ED physician	ED phycisian	malaise	no	no	no	no	no	no	no	no	no	0	low	no	no	no	no	0	no					no						no						home	same	210
98	77	male	yes	general practitioner	ambulance	orange	cardiology	specialist	palpitations	yes	yes	no	no	no	no	yes	no	no	1	low	no	no	no	yes	1	yes	emergency physician	pre-existing agreement	cardioversion	yes	no						no						outpatient follow-up	same	254
99	35	male	yes	specialist	ambulatory	orange	other	specialist	abdominal pain	no	no	no	no	no	no	yes	yes	no	0	low	no	no	no	no	0	no					no						no						admission ward	same	157
100	72	male	yes	self-refferal	ambulance	red	ED physician	ED phycisian	traumatic injury	no	no	no	no	no	no	no	no	no	0	low	no	no	yes	no	0	no					no						no						admission ward	same	27
101	70	male	yes	general practitioner	ambulatory	green	ED physician	ED phycisian	malaise	no	yes	no	no	yes	no	no	no	no	3	low	no	no	no	yes	1	yes	surgery	other		yes	no						no						home	same	306
102	40	female	yes	self-refferal	ambulance	orange	ED physician	ED phycisian	traumatic injury	no	no	no	no	no	no	no	no	no	0	low	no	no	no	no	0	no					no						no						home	same
103	87	male	yes	self-refferal	ambulance	orange	ED physician	ED phycisian	chest pain	yes	no	no	no	no	no	no	no	no	1	low	no	no	no	yes	1	yes	internal medicine	admission department		yes	no						no						admission ward	same
104	67	male	yes	specialist	ambulatory	yellow	cardiology	specialist	chest pain	yes	yes	no	no	no	no	no	yes	no	2	low	no	no	no	no	0	no					no						no						home	same	201
105	54	female	yes	general practitioner	ambulance	orange	cardiology	specialist	chest pain	no	no	no	no	no	no	no	no	no	0	low	no	no	no	no	0	no					no						no						home	same
106	9	female	no	self-refferal	ambulance	yellow	ED physician	ED phycisian	traumatic injury	no	no	no	no	no	no	no	no	no	0	low	yes	yes	no	yes	1	yes	other	specific procedure	operation	yes	no						no						admission ward	same	98
107	26	female	yes	general practitioner	ambulatory	yellow	internal medicine	specialist	abdominal pain	no	no	yes	no	no	no	no	no	no	1	low	no	no	no	no	0	no					no						no						outpatient follow-up	same
108	93	female	yes	self-refferal	ambulance	yellow	ED physician	ED phycisian	collaps	no	yes	no	yes	no	no	no	no	no	1	low	no	no	no	no	0	no					no						no						home	same	103
109	93	male	yes	general practitioner	ambulatory	green	internal medicine	specialist	dyspnea	yes	yes	no	no	no	no	yes	no	no	2	low	no	no	no	yes	1	missed	cardiology				no						no						admission ward	same
110	15	male	no	self-refferal	ambulatory	green	ED physician	ED phycisian	traumatic injury	no	no	no	no	no	no	no	no	no	0	low	no	no	no	no	0	no					no						no						home	same	85
111	77	female	yes	self-refferal	ambulance	yellow	neurology	specialist	malaise	no	no	no	no	no	no	no	no	no	0	low	no	no	no	no	0	no					no						no						admission ward	same	221
112	63	male	yes	specialist	ambulatory	yellow	other	specialist	other	no	no	no	no	no	no	no	yes	no	2	low	no	no	no	no	0	no					no						no						admission ward	same	151
113	67	male	yes	general practitioner	ambulance	orange	ED physician	ED phycisian	chest pain	yes	no	no	no	no	no	no	no	no	1	low	no	no	no	yes	1	yes	cardiology	exclusion diagnosis	ACS	yes	no						no						home	same	275
114	81	female	yes	general practitioner	ambulance	orange	cardiology	specialist	chest pain	yes	yes	no	no	no	no	no	no	no	0	low	no	no	no	no	0	no					no						no						outpatient follow-up	same	124
115	78	male	yes	general practitioner	ambulance	yellow	ED physician	ED phycisian	malaise	yes	yes	no	no	yes	no	no	no	no	8	high	no	no	no	yes	1	yes	internal medicine	admission department		yes	no						no						admission ward	same	236
116	91	female	yes	general practitioner	ambulatory	yellow	internal medicine	specialist	malaise	no	no	no	no	no	no	no	no	no	0	low	no	no	no	no	0	no					no						no						admission ward	same	216
117	17	female	yes	specialist	ambulance	orange	other	specialist	malaise	no	no	no	no	no	no	no	no	no	0	low	yes	yes	no	no	0	no					no						no						other	same	228
118	24	female	yes	self-refferal	ambulance	yellow	ED physician	ED phycisian	traumatic injury	no	no	no	no	no	no	no	no	no	0	low	no	no	no	no	0	no					no						no						outpatient follow-up	same
119	89	female	yes	general practitioner	ambulance	green	neurology	specialist	malaise	yes	yes	yes	yes	yes	no	no	no	no	5	high	no	no	no	no	0	no					no						no						home	same	230
120	51	male	yes	specialist	ambulance	orange	internal medicine	specialist	malaise	no	yes	no	no	no	no	no	yes	no	2	low	no	no	no	no	0	no					no						no						admission ward	same	228
121	18	female	yes	general practitioner	ambulatory	green	ED physician	ED phycisian	traumatic injury	no	no	no	no	no	no	no	no	no	0	low	no	no	no	no	0	no					no						no						home	same	63
122	65	female	yes	self-refferal	ambulance	yellow	ED physician	ED phycisian	collaps	no	yes	no	no	no	no	no	no	no	0	low	no	no	no	no	0	no					no						no						home	same
123	54	female	yes	general practitioner	ambulance	yellow	neurology	specialist	other	no	yes	no	yes	no	yes	no	no	no	3	low	no	no	no	no	0	no					no						no						admission ward	same	130
124	52	female	yes	specialist	ambulatory	yellow	ED physician	ED phycisian	dyspnea	no	no	no	no	no	no	no	yes	yes	1	low	no	no	no	no	0	no					no						no						admission ward	same	44
125	63	female	yes	specialist	ambulatory	yellow	internal medicine	specialist	dyspnea	no	no	no	yes	no	no	no	yes	no	6	high	no	no	no	no	0	no					no						no						admission ward	same
126	8	female	no	general practitioner	ambulatory	yellow	surgery	specialist	abdominal pain	no	no	no	no	no	no	no	no	no	0	low	no	no	no	no	0	no					no						no						admission ward	same	214
127	13	female	no	specialist	ambulatory	orange	other	specialist	malaise	yes	no	no	no	no	no	no	no	no	0	low	no	no	no	no	0	no					no						no						home	same
128	38	female	yes	self-refferal	ambulatory	yellow	other	specialist	abdominal pain	no	no	no	no	no	no	no	no	no	0	low	no	no	no	no	0	no					no						no						admission ward	same	126
129	47	female	yes	specialist	ambulatory	yellow	other	specialist	other	no	no	no	no	no	no	no	no	no	0	low	no	no	no	no	0	no					no						no						outpatient follow-up	same	74
130	1	male	no	general practitioner	ambulatory	orange	other	specialist	malaise	no	no	no	no	no	no	no	no	no	0	low	no	no	no	no	0	no					no						no						outpatient follow-up	same
131	40	female	yes	specialist	ambulatory	yellow	internal medicine	specialist	malaise	no	yes	no	no	yes	no	no	yes	no	4	high	no	no	no	no	0	no					no						no						admission ward	next
132	13	male	no	self-refferal	ambulatory	green	ED physician	ED phycisian	traumatic injury	no	no	no	no	no	no	no	no	no	0	low	no	no	no	no	0	no					no						no						home	same	11
133	51	male	yes	general practitioner	ambulance	orange	cardiology	specialist	chest pain	yes	yes	no	no	no	no	no	no	no	1	low	no	no	no	no	0	no					no						no						outpatient follow-up	same	123
134	22	female	yes	self-refferal	ambulatory	yellow	ED physician	ED phycisian	dyspnea	no	no	no	no	no	no	no	no	no	0	low	no	no	no	no	0	no					no						no						home	same	111
135	2	female	no	specialist	ambulatory	green	ED physician	ED phycisian	traumatic injury	no	no	no	no	no	no	no	no	no	0	low	no	no	no	no	0	no					no						no						outpatient follow-up	same	64
136	59	male	yes	specialist	ambulatory	green	internal medicine	specialist	traumatic injury	no	no	no	no	no	no	no	no	no	0	low	no	no	no	no	0	no					no						no						outpatient follow-up	same
137	1	female	no	general practitioner	ambulatory	yellow	neurology	specialist	other	no	no	no	no	no	no	no	no	no	0	low	no	no	no	yes	1	yes	other	other		yes	no						no						home	same
138	5	female	no	specialist	ambulatory	orange	other	specialist	malaise	no	no	yes	no	no	no	no	yes	no	1	low	no	no	no	no	0	no					no						no						admission ward	next
139	40	female	yes	self-refferal	ambulatory	yellow	ED physician	ED phycisian	dyspnea	no	no	no	no	no	no	no	no	no	0	low	no	no	no	no	0	no					no						no						home	same
140	75	male	yes	general practitioner	ambulatory	yellow	internal medicine	specialist	malaise	no	no	yes	no	no	no	no	no	no	1	low	no	no	no	no	0	no					no						no						admission ward	same	278
141	66	female	yes	general practitioner	ambulatory	yellow	neurology	specialist	headdache	no	no	no	no	no	no	no	yes	yes	1	low	no	no	no	no	0	no					no						no						home	same	525
142	64	female	yes	specialist	ambulatory	green	ED physician	ED phycisian	traumatic injury	yes	yes	no	no	no	no	no	no	no	1	low	no	no	no	no	0	no					no						no						home	same	19
143	40	female	yes	general practitioner	ambulance	orange	ED physician	ED phycisian	collaps	no	no	no	no	no	no	no	no	no	0	low	no	no	yes	no	0	no					no						no						outpatient follow-up	same	121
144	81	female	yes	specialist	ambulance	yellow	ED physician	ED phycisian	malaise	no	yes	no	no	no	no	no	yes	yes	4	high	no	no	no	yes	1	yes	internal medicine	admission department		yes	no						no						admission ward	same	134
145	23	female	yes	self-refferal	ambulatory	orange	other	specialist	dyspnea	no	no	yes	no	no	no	no	no	no	1	low	no	no	no	no	0	no					no						no						outpatient follow-up	same	132
146	39	male	yes	general practitioner	ambulatory	green	cardiology	specialist	dyspnea	yes	no	no	no	yes	no	no	no	no	3	low	no	no	no	no	0	no					no						no						outpatient follow-up	same	134
147	22	female	yes	self-refferal	ambulance	green	ED physician	ED phycisian	traumatic injury	no	no	no	no	no	no	no	no	no	0	low	no	no	no	no	0	no					no						no						home	same
148	25	female	yes	self-refferal	ambulance	green	ED physician	ED phycisian	traumatic injury	no	no	no	no	no	no	no	no	no	0	low	no	no	no	yes	1	yes	other	other		yes	no						no						outpatient follow-up	same	253
149	24	female	yes	specialist	ambulatory	yellow	other	specialist	dyspnea	no	no	no	no	no	no	no	no	no	0	low	no	no	no	no	0	no					no						no						home	same	149
150	56	female	yes	specialist	ambulatory	yellow	internal medicine	specialist	other	no	yes	no	no	no	no	no	yes	no	2	low	no	no	no	no	0	no					no						no						admission ward	same	217
151	57	male	yes	specialist	ambulatory	yellow	internal medicine	specialist	malaise	no	yes	no	no	yes	no	no	yes	no	2	low	no	no	no	no	0	no					no						no						home	same	168
152	81	female	yes	general practitioner	ambulatory	yellow	internal medicine	specialist	headdache	no	yes	no	no	no	no	no	no	no	0	low	no	no	no	yes	1	yes	other	specific procedure		yes	no						no						outpatient follow-up	same	333
153	57	male	yes	specialist	ambulatory	yellow	internal medicine	specialist	malaise	no	no	no	no	no	no	no	yes	no	6	high	no	no	no	no	0	no					no						no						home	same	252
154	48	male	yes	general practitioner	ambulance	orange	cardiology	specialist	chest pain	yes	no	no	no	no	no	no	no	no	2	low	no	no	no	no	0	no					no						no						admission ward	same
155	68	female	yes	general practitioner	ambulatory	yellow	ED physician	ED phycisian	abdominal pain	no	no	no	no	no	no	no	no	no	0	low	no	no	no	no	0	no					no						no						home	same	153
156	42	male	yes	specialist	ambulatory	yellow	ED physician	ED phycisian	traumatic injury	no	no	no	no	no	no	no	no	no	0	low	no	no	no	yes	1	yes	surgery	exclusion diagnosis		yes	no						no						outpatient follow-up	same	187
157	16	male	no	self-refferal	ambulatory	green	ED physician	ED phycisian	traumatic injury	no	no	no	no	no	no	no	no	no	0	low	no	no	no	no	0	no					no						no						outpatient follow-up	same
158	48	female	yes	self-refferal	ambulatory	yellow	ED physician	ED phycisian	traumatic injury	no	no	no	no	no	no	no	no	no	1	low	no	no	no	no	0	no					no						no						home	same	290
159	36	male	yes	general practitioner	ambulatory	orange	surgery	specialist	collaps	no	no	no	no	no	no	no	yes	no	2	low	no	no	no	no	0	no					no						no						admission ward	same
160	32	female	yes	self-refferal	ambulatory	green	ED physician	ED phycisian	traumatic injury	no	no	no	no	no	no	no	no	no	0	low	no	no	no	no	0	no					no						no						outpatient follow-up	same
161	70	female	yes	self-refferal	ambulance	orange	ED physician	ED phycisian	traumatic injury	yes	yes	no	no	no	no	no	no	no	2	low	no	no	yes	no	0	no					no						no						admission ward	same	12
162	23	male	yes	self-refferal	ambulance	orange	ED physician	ED phycisian	traumatic injury	no	no	no	no	no	no	no	no	no	0	low	no	no	yes	no	0	no					no						no						admission ICU	same	120
163	61	male	yes	general practitioner	ambulatory	green	internal medicine	specialist	traumatic injury	no	no	no	no	no	no	no	no	no	0	low	no	no	no	no	0	no					no						no						home	same	196
164	85	female	yes	self-refferal	ambulance	red	ED physician	ED phycisian	traumatic injury	no	no	no	no	no	no	no	no	no	0	low	no	no	yes	no	0	no					no						no						admission ward	same	20
165	91	male	yes	self-refferal	ambulance	red	ED physician	ED phycisian	malaise	no	no	no	no	no	no	no	yes	no	2	low	no	no	yes	no	0	no					no						no						admission ICU	same	-15
166	76	male	yes	specialist	ambulatory	yellow	neurology	specialist	other	no	no	no	yes	no	no	no	no	no	0	low	no	no	no	no	0	no					no						no						admission ward	same	168
167	3	male	no	general practitioner	ambulance	yellow	ED physician	ED phycisian	other	no	no	no	no	no	no	no	no	no	0	low	no	no	no	yes	1	yes	neurology	pre-existing agreement		yes	no						no						home	same	65
168	28	male	yes	self-refferal	ambulance	yellow	ED physician	ED phycisian	other	no	no	no	yes	no	no	no	no	no	0	low	no	no	no	no	0	no					no						no						home	same	205
169	29	male	yes	self-refferal	ambulatory	yellow	ED physician	ED phycisian	chest pain	no	no	no	no	no	no	no	no	no	0	low	no	no	no	no	0	no					no						no						home	same	138
170	63	male	yes	self-refferal	ambulatory	green	ED physician	ED phycisian	traumatic injury	yes	no	yes	no	no	no	no	no	no	3	low	no	no	no	no	0	no					no						no						outpatient follow-up	same	114
171	62	male	yes	general practitioner	ambulatory	yellow	cardiology	specialist	collaps	yes	yes	no	no	no	no	no	no	no	1	low	no	no	no	no	0	no					no						no						home	same
172	75	male	yes	general practitioner	ambulatory	yellow	other	specialist	malaise	no	yes	no	no	no	no	no	no	no	0	low	no	no	no	no	0	no					no						no						admission ward	same
173	29	female	yes	specialist	ambulance	green	internal medicine	specialist	malaise	no	no	no	no	no	no	no	no	no	0	low	no	no	no	no	0	no					no						no						home	same	155
174	5	female	no	self-refferal	ambulatory	green	ED physician	ED phycisian	traumatic injury	no	no	no	no	no	no	no	no	no	0	low	no	no	no	no	0	no					no						no						home	same	69
175	19	male	yes	self-refferal	ambulatory	yellow	ED physician	ED phycisian	other	no	no	no	no	no	no	no	no	no	0	low	no	no	no	no	0	no					no						no						outpatient follow-up	same
176	75	male	yes	self-refferal	ambulance	yellow	ED physician	ED phycisian	traumatic injury	no	no	no	no	no	no	no	no	no	0	low	no	no	no	no	0	no					no						no						outpatient follow-up	same
177	31	male	yes	self-refferal	ambulatory	orange	ED physician	ED phycisian	malaise	no	no	no	no	no	no	no	no	no	0	low	no	no	no	yes	1	yes	neurology	uncertainty diagnosis		yes	no						no						home	same	253
178	85	male	yes	general practitioner	ambulance	orange	other	specialist	dyspnea	no	no	yes	no	no	no	no	no	no	1	low	no	no	no	yes	1	yes	cardiology	specific procedure		yes	no						no						admission ward	next
179	49	male	yes	general practitioner	ambulatory	yellow	cardiology	specialist	chest pain	yes	yes	no	no	no	no	no	no	no	0	low	no	no	no	no	0	no					no						no						admission ward	same	250
180	68	female	yes	specialist	ambulatory	yellow	ED physician	ED phycisian	abdominal pain	no	no	no	no	no	no	no	no	no	0	low	no	no	no	no	0	no					no						no						home	same	140
181	23	male	yes	specialist	ambulatory	yellow	surgery	specialist	abdominal pain	no	no	no	no	no	no	no	no	no	0	low	no	no	no	no	0	no					no						no						home	same	155
182	29	male	yes	general practitioner	ambulance	yellow	ED physician	ED phycisian	abdominal pain	no	no	no	no	no	no	no	no	no	0	low	no	no	no	yes	1	yes	surgery	specific procedure	operation	yes	no						no						outpatient follow-up	same
183	51	male	yes	general practitioner	ambulatory	yellow	internal medicine	specialist	other	no	yes	no	no	no	no	no	no	no	0	low	no	no	no	no	0	no					no						no						home	same
184	54	male	yes	general practitioner	ambulatory	green	surgery	specialist	other	no	no	no	no	no	no	no	no	no	0	low	no	no	no	no	0	no					no						no						outpatient follow-up	same
185	71	female	yes	general practitioner	ambulance	yellow	ED physician	ED phycisian	traumatic injury	no	no	no	no	no	no	no	no	no	0	low	no	no	no	yes	1	yes	surgery	admission department		yes	no						no						admission ward	same	94
186	0	female	no	general practitioner	ambulatory	orange	other	specialist	dyspnea	no	no	no	no	no	no	no	no	no	0	low	no	no	no	no	0	no					no						no						admission ward	same	146
187	41	female	yes	general practitioner	ambulatory	yellow	ED physician	ED phycisian	other	no	no	yes	no	no	no	no	no	no	1	low	no	no	no	yes	1	yes	other	pre-existing agreement		yes	no						no						outpatient follow-up	same	197
188	18	female	yes	general practitioner	ambulatory	yellow	other	specialist	dyspnea	no	no	no	no	no	no	no	no	no	0	low	no	no	no	no	0	no					no						no						outpatient follow-up	same	154
189	84	male	yes	general practitioner	ambulatory	green	neurology	specialist	other	yes	no	no	no	no	no	no	no	no	0	low	no	no	no	yes	1	yes	emergency physician	pre-existing agreement	trauma screening	yes	no						no						outpatient follow-up	same
190	40	female	yes	general practitioner	ambulatory	yellow	other	specialist	dyspnea	no	no	no	no	no	no	no	no	no	0	low	no	no	no	no	0	no					no						no						home	same
191	62	male	yes	self-refferal	ambulatory	orange	ED physician	ED phycisian	chest pain	no	no	no	no	no	no	no	no	no	0	low	no	no	no	yes	1	yes	cardiology	admission department		yes	no						no						outpatient follow-up	same
192	71	male	yes	general practitioner	ambulatory	yellow	neurology	specialist	malaise	no	no	no	no	no	no	no	no	no	0	low	no	no	no	yes	2	yes	emergency physician	pre-existing agreement		yes	no	neurology	cardiology				no						admission ward	next
193	37	female	yes	specialist	ambulatory	yellow	other	specialist	other	no	no	no	no	no	no	no	no	no	0	low	no	no	no	no	0	no					no						no						admission ward	same
194	2	female	no	general practitioner	ambulatory	green	neurology	specialist	other	no	no	no	no	no	no	no	no	no	0	low	no	no	no	no	0	no					no						no						home	same
195	60	female	yes	general practitioner	ambulance	yellow	ED physician	ED phycisian	palpitations	no	no	no	no	no	no	no	yes	no	2	low	no	no	no	no	0	no					no						no						home	same	111
196	17	female	yes	specialist	ambulatory	yellow	other	specialist	malaise	no	no	no	no	no	no	no	no	no	0	low	yes	yes	no	no	0	no					no						no						home	same
197	9	male	no	self-refferal	ambulatory	green	ED physician	ED phycisian	traumatic injury	no	no	no	no	no	no	no	no	no	0	low	no	no	no	no	0	no					no						no						home	same
198	82	female	yes	general practitioner	ambulance	orange	cardiology	specialist	chest pain	yes	yes	no	no	no	no	no	yes	no	2	low	no	no	no	yes	1	yes	neurology	exclusion diagnosis		yes	no						no						admission ward	same	312
199	61	male	yes	specialist	ambulatory	yellow	internal medicine	specialist	malaise	yes	no	no	no	no	no	no	yes	no	2	low	no	no	no	yes	1	yes	cardiology	specific procedure		yes	no						no						admission ward	same	270
200	51	male	yes	self-refferal	ambulatory	yellow	ED physician	ED phycisian	other	no	no	no	no	no	no	no	no	no	0	low	no	no	no	no	0	no					no						no						outpatient follow-up	same	163
201	46	male	yes	specialist	ambulatory	green	ED physician	ED phycisian	traumatic injury	no	no	no	no	no	no	no	no	no	0	low	no	no	no	no	0	no					no						no						outpatient follow-up	same	42
202	3	male	no	self-refferal	ambulatory	yellow	ED physician	ED phycisian	other	no	no	no	no	no	no	no	no	no	0	low	no	no	no	no	0	no					no						no						home	same	34
203	68	male	yes	specialist	ambulance	yellow	internal medicine	specialist	other	yes	yes	no	no	yes	no	no	yes	no	2	low	no	no	no	no	0	no					no						no						admission ward	same	146
204	26	male	yes	general practitioner	ambulatory	yellow	internal medicine	specialist	other	no	no	no	no	no	no	no	no	no	2	low	no	no	no	no	0	no					no						no						admission ward	same	188
205	70	female	yes	self-refferal	ambulance	orange	ED physician	ED phycisian	malaise	yes	yes	yes	no	no	no	no	no	no	2	low	no	no	yes	no	0	no					no						no						home	same	281
206	51	female	yes	specialist	ambulatory	yellow	internal medicine	specialist	malaise	no	no	no	yes	no	no	no	yes	no	2	low	no	no	no	no	0	no					no						no						home	same	209
207	27	female	yes	general practitioner	ambulatory	orange	ED physician	ED phycisian	other	no	no	no	no	no	no	no	no	no	0	low	no	no	no	no	0	no					no						no						home	same	90
208	91	female	yes	self-refferal	ambulance	yellow	ED physician	ED phycisian	other	yes	no	no	no	no	no	no	no	no	1	low	no	no	no	yes	2	yes	neurology	pre-existing agreement		yes	no	emergency physician	surgery	admission department		yes	no						admission ward	same	323
209	67	male	yes	general practitioner	ambulance	yellow	surgery	specialist	other	no	yes	no	no	no	no	no	yes	no	2	low	no	no	no	yes	1	yes	other	other		yes	no						no						home	same
210	0	male	no	specialist	ambulatory	green	neurology	specialist	other	no	no	no	no	no	no	no	no	no	0	low	no	no	no	yes	1	yes	emergency physician	pre-existing agreement	trauma screening	yes	no						no						admission ward	same	203
211	43	female	yes	specialist	ambulatory	green	neurology	specialist	malaise	no	no	no	no	no	no	no	yes	no	8	high	no	no	no	no	0	no					no						no						outpatient follow-up	same	181
212	77	male	yes	general practitioner	ambulance	yellow	ED physician	ED phycisian	collaps	no	no	yes	yes	yes	no	no	no	no	3	low	no	no	no	yes	1	yes	other	admission department		yes	no						no						admission ward	same	189
213	45	male	yes	general practitioner	ambulatory	yellow	internal medicine	specialist	malaise	no	no	no	no	no	no	no	no	no	0	low	no	no	no	no	0	no					no						no						admission ward	same	305
214	24	male	yes	specialist	ambulatory	yellow	neurology	specialist	headdache	no	no	no	no	no	no	no	yes	no	2	low	no	no	no	no	0	no					no						no						admission ward	same	286
215	83	female	yes	general practitioner	ambulatory	yellow	ED physician	ED phycisian	traumatic injury	no	yes	no	no	no	no	no	no	no	0	low	no	no	no	no	0	no					no						no						outpatient follow-up	same
216	62	male	yes	general practitioner	ambulatory	yellow	cardiology	specialist	palpitations	yes	no	no	no	no	no	no	yes	no	2	low	no	no	no	no	0	no					no						no						outpatient follow-up	same
217	63	female	yes	general practitioner	ambulatory	yellow	surgery	specialist	other	no	yes	no	no	no	no	no	no	no	1	low	no	no	no	no	0	no					no						no						outpatient follow-up	same	136
218	19	male	yes	specialist	ambulatory	green	ED physician	ED phycisian	traumatic injury	no	no	no	no	no	no	no	no	no	0	low	no	no	no	yes	1	missed	surgery				no						no						outpatient follow-up	same	141
219	23	male	yes	self-refferal	ambulance	yellow	ED physician	ED phycisian	other	no	no	no	no	no	no	no	no	no	0	low	no	no	no	yes	1	yes	other	specific procedure		yes	no						no						home	same	49
220	1	female	no	general practitioner	ambulatory	yellow	ED physician	ED phycisian	malaise	no	no	no	no	no	no	no	no	no	0	low	no	no	no	yes	1	yes	neurology	admission department		yes	no						no						admission ward	same	160
221	62	female	yes	general practitioner	ambulance	green	surgery	specialist	traumatic injury	no	yes	no	no	no	no	no	yes	no	4	high	no	no	no	no	0	no					no						no						home	same	60
222	69	male	yes	general practitioner	ambulatory	yellow	internal medicine	specialist	other	no	yes	no	no	no	no	no	yes	yes	1	low	no	no	no	no	0	no					no						no						outpatient follow-up	same	337
223	22	male	yes	self-refferal	ambulatory	green	ED physician	ED phycisian	other	no	no	no	no	no	no	no	no	no	0	low	no	no	no	no	0	no					no						no						home	same	82
224	58	female	yes	general practitioner	ambulance	orange	ED physician	ED phycisian	other	no	no	no	no	no	no	no	no	no	0	low	no	no	yes	no	0	no					no						no						admission ward	same
225	67	male	yes	general practitioner	ambulatory	yellow	other	specialist	other	no	yes	no	no	no	no	no	yes	no	2	low	no	no	no	no	0	no					no						no						home	same
226	0	male	no	specialist	ambulatory	yellow	other	specialist	malaise	yes	no	no	no	no	no	no	no	no	1	low	no	no	no	no	0	no					no						no						home	same	158
227	71	female	yes	general practitioner	ambulatory	orange	internal medicine	specialist	malaise	no	yes	no	no	no	no	no	yes	no	2	low	no	no	no	no	0	no					no						no						admission ward	same	199
228	65	male	yes	general practitioner	ambulatory	yellow	neurology	specialist	headdache	yes	no	no	no	yes	no	no	yes	no	7	high	no	no	no	no	0	no					no						no						home	same
229	74	male	yes	specialist	ambulance	orange	cardiology	specialist	chest pain	yes	yes	no	yes	no	no	no	no	no	2	low	no	no	no	no	0	no					no						no						home	same
230	63	female	yes	specialist	ambulatory	yellow	internal medicine	specialist	abdominal pain	no	yes	no	no	no	yes	no	yes	no	6	high	no	no	no	no	0	no					no						no						admission ward	same	227
231	69	female	yes	self-refferal	ambulatory	orange	ED physician	ED phycisian	collaps	no	yes	no	no	no	no	no	yes	no	2	low	no	no	no	no	0	no					no						no						home	same	158
232	22	male	yes	general practitioner	ambulatory	green	other	specialist	other	no	no	no	no	no	no	no	no	no	0	low	no	no	no	no	0	no					no						no						outpatient follow-up	same
233	74	male	yes	specialist	ambulatory	yellow	ED physician	ED phycisian	traumatic injury	no	yes	no	no	no	no	no	no	no	0	low	no	no	no	no	0	no					no						no						outpatient follow-up	same	44
234	25	female	yes	self-refferal	ambulatory	yellow	ED physician	ED phycisian	dyspnea	no	no	no	no	no	no	no	no	no	0	low	no	no	no	no	0	no					no						no						home	same	158
235	58	female	yes	general practitioner	ambulatory	yellow	ED physician	ED phycisian	abdominal pain	no	yes	yes	no	no	no	no	no	no	1	low	no	no	no	yes	1	missed	surgery				no						no						admission ward	next
236	69	female	yes	general practitioner	ambulatory	orange	ED physician	ED phycisian	chest pain	no	yes	no	no	no	no	no	no	no	0	low	no	no	no	no	0	no					no						no						home	same	134
237	22	male	yes	self-refferal	ambulance	orange	ED physician	ED phycisian	other	no	no	no	no	no	no	no	no	no	0	low	no	no	no	yes	1	yes	surgery	pre-existing agreement		yes	no						no						outpatient follow-up	same	124
238	59	female	yes	general practitioner	ambulatory	yellow	cardiology	specialist	palpitations	no	no	no	yes	no	no	no	no	no	0	low	no	no	no	yes	1	yes	emergency physician	pre-existing agreement	cardioversion	yes	no						no						outpatient follow-up	same
239	44	male	yes	self-refferal	ambulance	yellow	ED physician	ED phycisian	traumatic injury	no	no	no	no	no	no	no	no	no	0	low	no	no	no	yes	1	yes	surgery	specific procedure	operation	yes	no						no						admission ward	same
240	17	male	yes	self-refferal	ambulatory	green	ED physician	ED phycisian	traumatic injury	no	no	no	no	no	no	no	no	no	0	low	no	no	no	no	0	no					no						no						home	same
241	56	female	yes	general practitioner	ambulatory	orange	internal medicine	specialist	dyspnea	no	yes	no	no	no	no	no	no	no	1	low	no	no	no	no	0	no					no						no						admission ward	same	240
242	88	male	yes	general practitioner	ambulance	red	ED physician	ED phycisian	dyspnea	yes	no	yes	yes	no	no	no	no	no	2	low	no	no	yes	no	0	no					no						no						admission ICU	same	28
243	19	male	yes	specialist	ambulatory	green	ED physician	ED phycisian	traumatic injury	no	no	no	no	no	no	no	no	no	0	low	no	no	no	no	0	no					no						no							same
244	81	male	yes	general practitioner	ambulatory	orange	cardiology	specialist	dyspnea	yes	yes	no	no	no	no	no	no	no	1	low	no	no	no	no	0	no					no						no						outpatient follow-up	same	142
245	75	female	yes	general practitioner	ambulatory	orange	other	specialist	dyspnea	no	no	yes	no	no	no	no	yes	no	1	low	no	yes	no	no	0	no					no						no						admission ward	same	128
246	68	female	yes	general practitioner	ambulance	yellow	ED physician	ED phycisian	other	yes	yes	yes	no	no	no	no	yes	no	6	high	no	no	no	yes	1	yes	other	admission department		yes	no						no						admission ward	same	236
247	82	male	yes	self-refferal	ambulance	orange	ED physician	ED phycisian	dyspnea	yes	yes	no	no	no	no	no	yes	no	9	high	no	no	no	yes	1	yes	internal medicine	admission department		yes	no						no						admission ward	same	214
248	29	male	yes	self-refferal	ambulance	orange	ED physician	ED phycisian	other	no	no	no	no	no	no	no	no	no	0	low	no	no	no	no	0	no					no						no						home	same	71
249	6	female	no	self-refferal	ambulatory	green	ED physician	ED phycisian	traumatic injury	no	no	no	no	no	no	no	no	no	0	low	no	no	no	no	0	no					no						no						home	same	29
250	15	male	no	specialist	ambulatory	green	ED physician	ED phycisian	traumatic injury	no	no	no	no	no	no	no	no	no	0	low	no	no	no	no	0	no					no						no						outpatient follow-up	same	76
251	85	female	yes	general practitioner	ambulance	yellow	internal medicine	specialist	other	yes	no	no	no	no	no	no	yes	no	2	low	no	no	no	no	0	no					no						no						admission ward	same	201
252	67	male	yes	specialist	ambulance	yellow	cardiology	specialist	palpitations	no	no	no	no	no	no	no	no	no	0	low	no	no	no	no	0	no					no						no						admission ward	same	124
253	12	female	no	self-refferal	ambulance	yellow	ED physician	ED phycisian	collaps	no	no	no	no	no	no	no	no	no	0	low	no	no	no	no	0	no					no						no						outpatient follow-up	same	104
254	68	female	yes	specialist	ambulatory	green	neurology	specialist	malaise	no	no	no	no	no	no	no	no	no	0	low	no	no	no	no	0	no					no						no						home	same	132
255	68	male	yes	general practitioner	ambulance	orange	other	specialist	malaise	no	no	no	no	no	no	yes	yes	no	2	low	no	no	no	yes	1	yes	intensive care	admission IC		no	no						no						admission ICU	same	159
256	67	female	yes	general practitioner	ambulatory	yellow	ED physician	ED phycisian	traumatic injury	no	no	yes	no	no	no	no	no	no	1	low	no	no	no	no	0	no					no						no						outpatient follow-up	same	121
257	77	female	yes	general practitioner	ambulance	yellow	neurology	specialist	malaise	no	no	no	yes	no	no	no	yes	no	6	high	no	no	no	yes	1	yes	other	other		yes	no						no						outpatient follow-up	same	356
258	7	male	no	self-refferal	ambulatory	green	ED physician	ED phycisian	traumatic injury	no	no	no	no	no	no	no	no	no	0	low	no	no	no	no	0	no					no						no						home	same	91
259	38	male	yes	general practitioner	ambulatory	green	internal medicine	specialist	malaise	no	no	no	no	no	no	no	no	no	0	low	no	no	no	no	0	no					no						no						home	same	198
260	8	male	no	self-refferal	ambulance	green	ED physician	ED phycisian	other	no	no	no	no	no	no	no	no	no	0	low	no	no	no	no	0	no					no						no						home	same	58
261	26	male	yes	self-refferal	ambulatory	yellow	ED physician	ED phycisian	other	no	no	no	no	no	no	no	no	no	0	low	no	no	no	no	0	no					no						no						home	same	92
262	59	male	yes	specialist	ambulatory	yellow	internal medicine	specialist	malaise	no	yes	yes	no	no	no	no	yes	no	4	high	no	no	no	yes	1	yes	other	specific procedure		yes	no						no						admission ward	same	331
263	35	female	yes	general practitioner	ambulatory	orange	ED physician	ED phycisian	dyspnea	no	no	no	no	no	no	no	no	no	0	low	no	no	no	no	0	no					no						no						home	same	189
264	47	female	yes	self-refferal	ambulatory	yellow	ED physician	ED phycisian	other	no	no	no	no	no	no	no	no	no	0	low	no	no	no	no	0	no					no						no						outpatient follow-up	same	147
265	2	male	no	self-refferal	ambulatory	green	ED physician	ED phycisian	other	no	no	no	no	no	no	no	no	no	0	low	no	no	no	no	0	no					no						no						home	same	41
266	56	male	yes	specialist	ambulatory	blue	surgery	specialist	traumatic injury	yes	yes	no	no	yes	no	no	yes	no	5	high	no	no	no	no	0	no					no						no						home	same	23
267	77	female	yes	general practitioner	ambulatory	orange	internal medicine	specialist	abdominal pain	no	no	no	no	no	no	no	yes	no	2	low	no	no	no	no	0	no					no						no						admission ward	same	172
268	21	male	yes	self-refferal	ambulatory	orange	ED physician	ED phycisian	traumatic injury	no	no	no	no	no	no	no	no	no	0	low	no	no	no	yes	1	yes	surgery	outpatient follow-up		yes	no						no						outpatient follow-up	same	180
269	85	male	yes	self-refferal	ambulance	yellow	ED physician	ED phycisian	other	no	no	yes	no	no	no	no	no	no	1	low	no	no	no	yes	1	yes	neurology	pre-existing agreement	CT-cerebrum	yes	no						no						outpatient follow-up	same
270	36	male	yes	general practitioner	ambulatory	orange	ED physician	ED phycisian	abdominal pain	no	no	no	no	no	no	no	no	no	0	low	no	no	no	yes	1	yes	surgery	other		yes	no						no						outpatient follow-up	same	256
271	51	female	yes	general practitioner	ambulatory	yellow	neurology	specialist	malaise	no	no	yes	no	no	no	no	no	no	1	low	no	no	no	no	0	no					no						no						outpatient follow-up	same
272	37	male	yes	general practitioner	ambulance	orange	cardiology	specialist	chest pain	yes	no	no	no	no	no	no	no	no	1	low	no	no	no	no	0	no					no						no						outpatient follow-up	same	82
273	64	male	yes	self-refferal	ambulance	orange	ED physician	ED phycisian	dyspnea	yes	no	yes	no	no	no	no	no	no	2	low	no	no	no	yes	1	yes	internal medicine	admission department		yes	no						no						admission ward	same
274	32	female	yes	self-refferal	ambulance	yellow	ED physician	ED phycisian	other	no	no	no	no	no	no	no	no	no	0	low	no	no	no	no	0	no					no						no						outpatient follow-up	same
275	43	male	yes	specialist	ambulatory	yellow	other	specialist	other	no	no	no	no	no	no	no	no	no	0	low	no	no	no	no	0	no					no						no						outpatient follow-up	same
276	74	male	yes	self-refferal	ambulatory	orange	ED physician	ED phycisian	palpitations	no	no	no	no	no	no	no	no	no	0	low	no	no	no	yes	1	yes	cardiology	pre-existing agreement	cardioversion	yes	no						no						home	same	133
277	17	female	yes	general practitioner	ambulatory	yellow	ED physician	ED phycisian	traumatic injury	no	no	no	no	no	no	no	no	no	0	low	no	no	no	no	0	no					no						no						home	same	135
278	14	female	no	self-refferal	ambulatory	yellow	ED physician	ED phycisian	other	no	no	no	no	no	no	no	no	no	0	low	no	no	no	no	0	no					no						no						home	same	104
279	80	male	yes	general practitioner	ambulance	orange	surgery	specialist	traumatic injury	yes	no	no	no	yes	no	no	no	no	3	low	no	no	no	no	0	no					no						no						admission ward	same	76
280	53	male	yes	self-refferal	ambulance	orange	ED physician	ED phycisian	malaise	no	no	no	no	no	no	no	no	no	0	low	no	no	yes	no	0	no					no						no						admission ward	same
281	59	male	yes	general practitioner	ambulance	orange	internal medicine	specialist	abdominal pain	no	no	no	no	no	no	no	no	no	1	low	no	no	no	no	0	no					no						no						admission ward	next
282	53	male	yes	self-refferal	ambulatory	orange	ED physician	ED phycisian	traumatic injury	no	no	no	no	no	no	no	no	no	0	low	no	no	no	yes	1	yes	surgery	specific procedure		no	no						no						admission ward	same
283	84	female	yes	general practitioner	ambulatory	yellow	neurology	specialist	other	yes	no	no	no	no	no	no	yes	no	3	low	no	no	no	yes	1	yes	emergency physician	pre-existing agreement	trauma screening	yes	no						no						outpatient follow-up	same
284	68	female	yes	self-refferal	ambulatory	orange	ED physician	ED phycisian	traumatic injury	no	no	no	no	no	no	no	no	no	0	low	no	no	no	no	0	no					no						no						outpatient follow-up	same
285	48	male	yes	general practitioner	ambulatory	yellow	internal medicine	specialist	abdominal pain	no	no	no	no	no	no	no	no	no	0	low	no	no	no	no	0	no					no						no						admission ward	same	177
286	50	female	yes	general practitioner	ambulatory	yellow	other	specialist	abdominal pain	no	no	no	no	no	no	no	no	no	1	low	no	no	no	no	0	no					no						no						admission ward	same
287	51	female	yes	self-refferal	ambulance	yellow	ED physician	ED phycisian	chest pain	no	no	no	no	no	no	no	no	no	0	low	no	no	no	no	0	no					no						no						home	same
288	80	male	yes	self-refferal	ambulatory	yellow	ED physician	ED phycisian	palpitations	no	no	no	no	no	no	no	no	no	0	low	no	no	no	yes	1	yes	cardiology	specific procedure		yes	no						no						home	same	259
289	36	female	yes	self-refferal	ambulatory	yellow	other	specialist	other	no	no	no	no	no	no	no	no	no	0	low	no	no	no	no	0	no					no						no						outpatient follow-up	same
290	6	female	no	general practitioner	ambulatory	yellow	other	specialist	malaise	no	no	no	no	no	no	no	yes	no	2	low	no	no	no	no	0	no					no						no						home	same
291	38	male	yes	self-refferal	ambulance	yellow	ED physician	ED phycisian	other	no	no	no	no	no	no	no	no	no	0	low	no	no	no	no	0	no					no						no						home	same	83
292	44	female	yes	specialist	ambulatory	yellow	surgery	specialist	abdominal pain	no	no	no	no	no	no	no	no	no	0	low	no	no	no	yes	1	yes	other	exclusion diagnosis		yes	no						no						home	same
293	41	female	yes	specialist	ambulance	green	ED physician	ED phycisian	dyspnea	no	no	no	no	no	no	no	no	no	0	low	no	no	no	yes	1	yes	cardiology	other		yes	no						no						outpatient follow-up	same	142
294	68	female	yes	specialist	ambulance	yellow	cardiology	specialist	palpitations	no	no	no	no	no	no	no	yes	no	2	low	no	no	no	yes	1	yes	emergency physician	pre-existing agreement	cardioversion	yes	no						no						outpatient follow-up	same	159
295	55	male	yes	self-refferal	ambulance	yellow	ED physician	ED phycisian	traumatic injury	no	yes	no	no	no	no	no	no	no	0	low	no	no	yes	no	0	no					no						no						home	same
296	86	female	yes	general practitioner	ambulance	green	ED physician	ED phycisian	malaise	no	no	no	no	no	no	no	no	no	0	low	no	no	no	yes	1	yes	cardiology	exclusion diagnosis		yes	no						no						admission ward	same	276
297	41	female	yes	specialist	ambulatory	green	other	specialist	other	no	no	no	no	no	no	no	no	no	0	low	no	no	no	no	0	no					no						no						admission ward	same	85
298	63	male	yes	specialist	ambulatory	yellow	other	specialist	malaise	no	no	no	no	no	no	no	no	no	1	low	no	no	no	yes	1	yes	internal medicine	other		yes	no						no						admission ward	same	466
299	6	male	no	self-refferal	ambulatory	orange	ED physician	ED phycisian	collaps	no	no	no	no	no	no	no	no	no	0	low	no	no	yes	no	0	no					no						no						admission ward	same	105
300	0	male	no	general practitioner	ambulatory	yellow	other	specialist	malaise	no	no	no	no	no	no	no	no	no	0	low	no	no	no	no	0	no					no						no						outpatient follow-up	same
301	76	male	yes	general practitioner	ambulance	yellow	ED physician	ED phycisian	malaise	yes	no	no	no	no	no	no	no	no	1	low	no	no	no	no	0	no					no						no						home	same
302	12	male	no	self-refferal	ambulatory	green	ED physician	ED phycisian	traumatic injury	no	no	no	no	no	no	no	no	no	0	low	no	no	no	no	0	no					no						no						outpatient follow-up	same
303	52	female	yes	general practitioner	ambulatory	green	ED physician	ED phycisian	other	no	yes	no	no	no	no	no	no	no	0	low	no	no	no	no	0	no					no						no						outpatient follow-up	same	313
304	60	female	yes	self-refferal	ambulatory	yellow	cardiology	specialist	palpitations	no	no	no	no	no	no	no	no	no	0	low	yes	yes	no	yes	1	missed	emergency physician				no						no						home	same	296
305	76	female	yes	self-refferal	ambulance	yellow	ED physician	ED phycisian	chest pain	yes	yes	no	no	no	no	no	yes	no	2	low	no	no	no	yes	1	yes	cardiology	exclusion diagnosis		yes	no						no						admission ward	same	304
306	78	male	yes	general practitioner	ambulance	yellow	neurology	specialist	traumatic injury	no	yes	no	no	no	no	no	no	no	1	low	no	no	no	no	0	no					no						no						admission ward	same	225
307	63	male	yes	self-refferal	ambulatory	yellow	surgery	specialist	abdominal pain	no	no	no	no	no	no	no	yes	no	2	low	no	no	no	no	0	no					no						no						outpatient follow-up	same
308	12	male	no	specialist	ambulatory	green	other	specialist	other	no	no	no	no	no	no	no	no	no	0	low	no	no	no	no	0	no					no						no						outpatient follow-up	same
309	13	female	no	general practitioner	ambulatory	yellow	ED physician	ED phycisian	abdominal pain	no	no	no	no	no	no	no	no	no	0	low	no	no	no	yes	1	yes	surgery	specific procedure		yes	no						no						admission ward	same	229
310	25	male	yes	specialist	ambulance	yellow	internal medicine	specialist	malaise	no	no	no	no	no	no	no	yes	no	6	high	no	no	no	no	0	no					no						no						admission ward	same
311	94	female	yes	general practitioner	ambulance	yellow	ED physician	ED phycisian	other	yes	yes	no	no	no	no	no	no	no	0	low	no	no	no	yes	1	yes	neurology	pre-existing agreement	CT-cerebrum	yes	no						no						home	same	222
312	53	female	yes	self-refferal	ambulatory	green	ED physician	ED phycisian	abdominal pain	no	no	no	no	no	no	no	no	no	0	low	no	no	no	no	0	no					no						no						home	same	84
313	77	male	yes	general practitioner	ambulatory	yellow	other	specialist	other	no	no	no	no	no	no	no	no	no	0	low	no	no	no	no	0	no					no						no						admission ward	same	121
314	70	male	yes	general practitioner	ambulatory	yellow	other	specialist	other	yes	no	no	no	no	no	no	no	no	1	low	no	no	no	yes	1	yes	internal medicine	exclusion diagnosis		no	no						no						home	same
315	75	female	yes	specialist	ambulatory	orange	other	specialist	dyspnea	no	no	yes	no	no	no	no	no	no	1	low	no	no	no	no	0	no					no						no						admission ward	same	169
316	57	female	yes	specialist	ambulatory	green	internal medicine	specialist	dyspnea	no	no	yes	no	no	no	no	yes	no	1	low	no	yes	no	no	0	no					no						no						outpatient follow-up	same	118
317	58	male	yes	self-refferal	ambulance	yellow	ED physician	ED phycisian	other	no	no	no	no	no	no	no	no	no	0	low	no	no	no	yes	1	yes	neurology	pre-existing agreement		yes	no						no						home	same	279
318	71	male	yes	general practitioner	ambulance	red	ED physician	ED phycisian	dyspnea	no	no	no	no	no	no	no	no	no	0	low	no	no	yes	no	0	no					no						no						admission ICU	same
319	35	female	yes	general practitioner	ambulatory	yellow	other	specialist	other	no	no	no	no	no	no	no	no	no	0	low	no	no	no	no	0	no					no						no						outpatient follow-up	same
320	45	male	yes	self-refferal	ambulance	green	ED physician	ED phycisian	other	no	no	no	no	no	no	no	no	no	0	low	no	no	no	no	0	no					no						no						outpatient follow-up	same	59
321	51	male	yes	general practitioner	ambulance	orange	other	specialist	dyspnea	no	yes	no	no	no	no	no	yes	no	2	low	no	yes	no	no	0	no					no						no						admission ward	same	125
322	66	male	yes	specialist	ambulatory	orange	cardiology	specialist	palpitations	no	no	yes	no	no	no	no	no	no	1	low	no	no	no	no	0	no					no						no						outpatient follow-up	same	139
323	49	female	yes	specialist	ambulance	orange	internal medicine	specialist	other	no	no	no	no	no	no	no	no	no	0	low	no	no	no	yes	2	yes	other	admission department		yes	no	internal medicine	intensive care	admission IC		no	no						admission ward	next
324	46	male	yes	self-refferal	ambulance	yellow	ED physician	ED phycisian	chest pain	no	yes	no	no	no	no	no	no	no	0	low	no	no	no	no	0	no					no						no						home	same	109
325	1	male	no	specialist	ambulatory	yellow	other	specialist	other	no	no	no	no	no	no	no	no	no	0	low	no	no	no	no	0	no					no						no						outpatient follow-up	same	205
326	60	female	yes	self-refferal	ambulatory	yellow	cardiology	specialist	palpitations	no	no	no	no	no	no	no	no	no	0	low	no	no	no	no	0	no					no						no						outpatient follow-up	same
327	0	female	no	general practitioner	ambulatory	green	ED physician	ED phycisian	other	no	no	no	no	no	no	no	no	no	0	low	no	no	no	no	0	no					no						no						home	same	55
328	84	female	yes	general practitioner	ambulatory	orange	cardiology	specialist	dyspnea	yes	yes	no	no	no	no	no	yes	no	2	low	no	no	no	no	0	no					no						no						admission ward	next
329	21	male	yes	specialist	ambulatory	yellow	internal medicine	specialist	malaise	no	no	no	no	no	no	no	yes	no	2	low	no	no	no	no	0	no					no						no						outpatient follow-up	same
330	1	male	no	general practitioner	ambulatory	orange	other	specialist	dyspnea	no	no	no	no	no	no	no	no	no	0	low	no	no	no	no	0	no					no						no						admission ward	same
331	48	female	yes	self-refferal	ambulatory	yellow	ED physician	ED phycisian	abdominal pain	no	yes	no	no	no	no	no	no	no	0	low	no	no	no	no	0	no					no						no						home	same
332	64	male	yes	self-refferal	ambulance	orange	ED physician	ED phycisian	collaps	no	no	no	no	no	no	no	no	no	0	low	no	no	no	no	0	no					no						no						home	same
333	87	male	yes	self-refferal	ambulance	orange	internal medicine	specialist	dyspnea	no	no	yes	no	no	no	no	yes	no	3	low	no	no	no	no	0	no					no						no						admission ward	next
334	5	male	no	specialist	ambulatory	yellow	ED physician	ED phycisian	traumatic injury	no	no	no	no	no	no	no	no	no	0	low	no	no	no	no	0	no					no						no						outpatient follow-up	same	71
335	55	male	yes	self-refferal	ambulatory	orange	ED physician	ED phycisian	chest pain	no	yes	no	no	no	no	no	no	no	0	low	no	no	no	yes	1	yes	cardiology	exclusion diagnosis	ACS	no	no						no						admission ward	same	270
336	8	female	no	specialist	ambulatory	yellow	ED physician	ED phycisian	malaise	no	no	no	no	no	no	no	no	no	1	low	no	no	no	yes	1	yes	other	admission department		yes	no						no						admission ward	same	293
337	56	male	yes	specialist	ambulatory	green	surgery	specialist	abdominal pain	no	no	no	no	no	no	no	yes	no	2	low	no	no	no	no	0	no					no						no						outpatient follow-up	same	140
338	68	female	yes	self-refferal	ambulance	yellow	ED physician	ED phycisian	traumatic injury	no	no	no	no	no	no	no	no	no	0	low	no	no	no	yes	1	yes	other	other		yes	no						no						outpatient follow-up	same
339	38	female	yes	specialist	ambulatory	yellow	surgery	specialist	other	no	no	no	no	no	no	no	no	no	0	low	no	yes	no	no	0	no					no						no						outpatient follow-up	same	118
340	5	male	no	self-refferal	ambulance	green	ED physician	ED phycisian	other	no	no	no	no	no	no	no	no	no	0	low	no	no	no	no	0	no					no						no						home	same	38
341	59	female	yes	specialist	ambulatory	green	internal medicine	specialist	malaise	yes	no	no	no	no	no	no	yes	no	3	low	no	no	no	yes	1	yes	intensive care	admission IC		no	no						no						admission ward	same	218
342	0	female	no	general practitioner	ambulance	orange	ED physician	ED phycisian	other	no	no	no	no	no	no	no	no	no	0	low	no	no	no	yes	1	yes	neurology	admission department		yes	no						no						admission ward	same	72
343	0	female	no	general practitioner	ambulatory	yellow	other	specialist	malaise	no	no	no	no	no	no	no	no	no	0	low	no	no	no	no	0	no					no						no						home	same
344	13	male	no	self-refferal	ambulatory	yellow	ED physician	ED phycisian	traumatic injury	no	no	no	no	no	no	no	no	no	0	low	no	no	no	yes	1	yes	other	pre-existing agreement		yes	no						no						outpatient follow-up	same	135
345	56	male	yes	self-refferal	ambulance	green	ED physician	ED phycisian	dyspnea	yes	no	no	no	no	no	no	no	no	1	low	no	no	no	no	0	no					no						no						outpatient follow-up	same	127
346	33	female	yes	self-refferal	ambulatory	orange	ED physician	ED phycisian	other	no	no	no	no	no	no	no	no	no	0	low	no	no	no	no	0	no					no						no						home	same	127
347	0	male	no	general practitioner	ambulatory	yellow	other	specialist	dyspnea	no	no	no	no	no	no	no	no	no	0	low	no	no	no	no	0	no					no						no						outpatient follow-up	same	131
348	17	male	yes	specialist	ambulatory	orange	internal medicine	specialist	other	no	no	yes	no	no	no	no	yes	no	3	low	no	no	no	no	0	no					no						no						admission ward	same	119
349	13	male	no	self-refferal	ambulance	yellow	ED physician	ED phycisian	other	no	no	no	no	no	no	no	no	no	0	low	no	no	no	no	0	no					no						no						home	same	108
350	81	male	yes	self-refferal	ambulance	orange	ED physician	ED phycisian	malaise	no	yes	no	no	no	no	no	no	no	0	low	no	no	yes	no	0	no					no						no						home	same	154
351	2	female	no	self-refferal	ambulance	green	ED physician	ED phycisian	other	no	no	no	no	no	no	no	no	no	0	low	no	no	yes	no	0	no					no						no						admission ward	same	214
352	75	female	yes	specialist	ambulatory	yellow	internal medicine	specialist	other	no	no	no	no	yes	no	no	no	no	2	low	no	no	no	no	0	no					no						no						admission ward	same
353	42	male	yes	specialist	ambulatory	yellow	ED physician	ED phycisian	traumatic injury	no	no	no	no	no	no	no	no	no	0	low	no	no	no	no	0	no					no						no						outpatient follow-up	same	55
354	54	male	yes	general practitioner	ambulatory	yellow	other	specialist	other	no	no	no	no	no	no	no	no	no	0	low	no	no	no	no	0	no					no						no						home	same	33
355	70	male	yes	self-refferal	ambulance	green	ED physician	ED phycisian	traumatic injury	no	no	no	no	no	no	no	yes	no	3	low	no	no	no	yes	1	yes	other	pre-existing agreement		yes	no						no						admission ward	same
356	70	male	yes	specialist	ambulatory	yellow	ED physician	ED phycisian	traumatic injury	no	no	no	no	no	no	no	no	no	0	low	no	no	no	yes	1	yes	other	specific procedure	operation	yes	no						no						outpatient follow-up	same
357	50	male	yes	specialist	ambulatory	yellow	internal medicine	specialist	other	no	no	no	no	no	no	no	no	no	0	low	no	no	no	no	0	no					no						no						admission ward	same	357
358	69	male	yes	specialist	ambulance	yellow	other	specialist	traumatic injury	no	yes	yes	no	no	no	no	no	no	1	low	no	no	no	no	0	no					no						no						admission ward	same	72
359	1	male	no	general practitioner	ambulatory	green	other	specialist	malaise	no	no	no	no	no	no	no	no	no	0	low	no	no	no	no	0	no					no						no						home	same	143
360	59	male	yes	self-refferal	ambulance	orange	other	specialist	other	no	no	no	no	no	no	no	no	no	0	low	no	no	no	no	0	no					no						no						admission ward	same
361	47	male	yes	general practitioner	ambulance	yellow	neurology	specialist	malaise	no	no	no	no	no	no	no	no	no	0	low	no	no	no	no	0	no					no						no						admission ward	same	266
362	76	female	yes	self-refferal	ambulance	orange	ED physician	ED phycisian	malaise	no	yes	yes	no	no	no	no	no	no	1	low	no	no	yes	no	0	no					no						no						admission ward	same	13
363	60	male	yes	self-refferal	ambulatory	green	ED physician	ED phycisian	traumatic injury	no	no	no	no	no	no	no	no	no	0	low	no	no	no	no	0	no					no						no						home	same	35
364	34	male	yes	general practitioner	ambulatory	orange	surgery	specialist	abdominal pain	no	no	no	no	no	no	no	no	no	0	low	no	no	no	no	0	no					no						no						admission ward	same	224
365	44	female	yes	general practitioner	ambulatory	green	other	specialist	other	no	no	no	no	no	no	no	no	no	0	low	no	no	no	no	0	no					no						no						home	same
366	25	female	yes	general practitioner	ambulatory	yellow	internal medicine	specialist	malaise	no	no	no	no	no	no	no	no	no	0	low	no	no	no	no	0	no					no						no						admission ward	next
367	91	male	yes	self-refferal	ambulance	green	ED physician	ED phycisian	other	no	no	no	no	no	no	no	no	no	0	low	no	no	no	no	0	no					no						no						home	same	34
368	10	female	no	general practitioner	ambulatory	green	ED physician	ED phycisian	other	no	no	no	no	no	no	no	no	no	0	low	no	no	no	yes	1	yes	neurology	pre-existing agreement		yes	no						no						home	same	172
369	72	female	yes	specialist	ambulatory	yellow	cardiology	specialist	collaps	yes	yes	no	no	no	no	no	no	no	2	low	no	no	no	no	0	no					no						no						admission ward	same
370	47	female	yes	self-refferal	ambulance	orange	ED physician	ED phycisian	palpitations	no	no	no	no	no	no	no	no	no	0	low	no	no	no	yes	1	yes	cardiology	pre-existing agreement	cardioversion	yes	no						no						home	same	146
371	18	female	yes	general practitioner	ambulance	green	ED physician	ED phycisian	traumatic injury	no	no	no	no	no	no	no	no	no	0	low	no	no	no	no	0	no					no						no						home	same
372	40	female	yes	general practitioner	ambulance	orange	ED physician	ED phycisian	abdominal pain	no	no	no	no	no	no	no	yes	no	0	low	no	no	no	yes	1	yes	internal medicine	admission department		yes	no						no						admission ward	same
373	68	female	yes	self-refferal	ambulatory	green	ED physician	ED phycisian	traumatic injury	no	no	no	no	no	no	no	no	no	0	low	no	no	no	no	0	no					no						no						outpatient follow-up	same
374	68	female	yes	general practitioner	ambulatory	orange	cardiology	specialist	chest pain	yes	no	no	no	no	no	no	no	no	1	low	no	no	no	no	0	no					no						no						home	same	151
375	40	male	yes	general practitioner	ambulatory	yellow	internal medicine	specialist	abdominal pain	no	no	no	no	no	no	no	yes	no	0	low	no	no	no	no	0	no					no						no						home	same
376	83	male	yes	general practitioner	ambulance	orange	neurology	specialist	dyspnea	no	yes	no	no	no	no	no	no	no	0	low	no	no	no	yes	1	yes	internal medicine	other		yes	no						no						admission ward	next
377	78	female	yes	specialist	ambulatory	green	ED physician	ED phycisian	traumatic injury	no	no	no	no	no	no	no	no	no	0	low	no	no	no	no	0	no					no						no						outpatient follow-up	same	49
378	59	female	yes	specialist	ambulatory	green	ED physician	ED phycisian	traumatic injury	no	no	no	no	no	no	no	no	no	0	low	no	no	no	no	0	no					no						no						outpatient follow-up	same
379	57	female	yes	specialist	ambulatory	yellow	internal medicine	specialist	malaise	no	no	no	no	yes	no	no	no	no	3	low	no	no	no	no	0	no					no						no						home	same
380	81	male	yes	self-refferal	ambulance	yellow	ED physician	ED phycisian	collaps	no	yes	no	yes	no	no	no	no	no	2	low	no	no	no	yes	1	yes	cardiology	specific procedure	read-out of ICD	yes	no						no						home	same
381	3	female	no	general practitioner	ambulatory	yellow	other	specialist	malaise	no	no	no	no	no	no	no	no	no	0	low	no	no	no	no	0	no					no						no						admission ward	same
382	56	female	yes	general practitioner	ambulatory	yellow	internal medicine	specialist	other	no	yes	no	no	no	no	no	yes	no	2	low	no	no	no	no	0	no					no						no						admission ward	next
383	23	female	yes	self-refferal	ambulatory	orange	ED physician	ED phycisian	other	no	no	no	no	no	no	no	no	no	0	low	no	no	no	yes	1	yes	other	specific procedure	fiber endoscopy	yes	no						no						home	same
384	83	female	yes	general practitioner	ambulance	yellow	neurology	specialist	other	yes	yes	no	no	no	no	no	no	no	0	low	no	no	no	yes	2	yes	emergency physician	pre-existing agreement	trauma screening	yes	no	neurology	other				no						outpatient follow-up	next
385	2	female	no	specialist	ambulatory	green	ED physician	ED phycisian	traumatic injury	no	no	no	no	no	no	no	no	no	0	low	no	no	no	no	0	no					no						no						outpatient follow-up	same	108
386	75	male	yes	specialist	ambulatory	orange	cardiology	specialist	palpitations	no	no	no	no	no	no	no	no	no	0	low	no	no	no	yes	1	yes	emergency physician	pre-existing agreement	cardioversion	yes	no						no						admission ward	same	150
387	58	female	yes	specialist	ambulatory	yellow	other	specialist	other	no	no	no	no	no	no	no	yes	no	6	high	no	no	no	no	0	no					no						no						admission ward	same	161
388	46	female	yes	general practitioner	ambulatory	green	surgery	specialist	other	no	yes	no	no	no	no	no	yes	no	3	low	no	no	no	no	0	no					no						no						outpatient follow-up	same	145
389	54	female	yes	self-refferal	ambulatory	green	ED physician	ED phycisian	abdominal pain	no	no	no	no	no	no	no	no	no	0	low	no	no	no	no	0	no					no						no						home	same	73
390	64	female	yes	specialist	ambulatory	orange	other	specialist	other	no	yes	no	no	no	no	no	no	no	0	low	no	no	no	no	0	no					no						no						home	same	244
391	78	female	yes	self-refferal	ambulance	orange	ED physician	ED phycisian	other	no	yes	no	no	no	no	no	no	no	1	low	no	no	yes	no	0	no					no						no						admission ward	same	129
392	49	male	yes	specialist	ambulatory	yellow	cardiology	specialist	malaise	yes	no	no	no	no	no	no	no	no	0	low	no	no	no	no	0	no					no						no						outpatient follow-up	same	172
393	72	female	yes	self-refferal	ambulance	orange	ED physician	ED phycisian	collaps	no	yes	no	no	no	no	no	yes	no	3	low	no	no	no	yes	1	yes	internal medicine	admission department		yes	no						no						admission ward	same	254
394	34	female	yes	general practitioner	ambulatory	yellow	neurology	specialist	other	no	yes	no	no	no	no	no	no	no	0	low	no	no	no	no	0	no					no						no						outpatient follow-up	same	332
395	75	male	yes	general practitioner	ambulance	orange	ED physician	ED phycisian	abdominal pain	no	no	no	no	no	no	no	no	no	0	low	no	no	yes	no	0	no					no						no						home	same	130
396	15	male	no	specialist	ambulatory	green	ED physician	ED phycisian	traumatic injury	no	no	no	no	no	no	no	no	no	0	low	no	no	no	no	0	no					no						no						outpatient follow-up	same
397	79	female	yes	general practitioner	ambulance	yellow	ED physician	ED phycisian	traumatic injury	no	no	no	no	no	no	no	no	no	0	low	no	no	no	no	0	no					no						no						outpatient follow-up	same	138
398	70	male	yes	general practitioner	ambulatory	yellow	neurology	specialist	other	yes	yes	no	no	yes	no	no	no	no	3	low	no	no	no	no	0	no					no						no						admission ward	same	318
399	78	male	yes	specialist	ambulatory	green	internal medicine	specialist	traumatic injury	no	no	yes	no	no	no	no	yes	no	7	high	no	no	no	no	0	no					no						no						home	same	262
400	31	male	yes	self-refferal	ambulance	yellow	ED physician	ED phycisian	collaps	no	no	no	no	no	no	no	no	no	0	low	no	no	no	yes	1	yes	neurology	exclusion diagnosis		no	no						no						home	same	294
401	59	female	yes	general practitioner	ambulatory	yellow	ED physician	ED phycisian	abdominal pain	no	no	yes	no	no	no	no	no	no	1	low	no	no	no	yes	1	yes	cardiology	other		yes	no						no						admission ward	same	442
402	54	male	yes	general practitioner	ambulance	orange	ED physician	ED phycisian	malaise	yes	no	no	no	no	no	no	yes	no	7	high	no	no	yes	no	0	no					no						no						admission ICU	same	88
403	93	female	yes	self-refferal	ambulance	red	ED physician	ED phycisian	malaise	yes	no	no	no	no	no	no	no	no	1	low	no	no	yes	no	0	no					no						no						other	same	34
404	65	male	yes	specialist	ambulance	yellow	internal medicine	specialist	other	no	yes	yes	no	no	no	no	yes	no	7	high	no	no	no	no	0	no					no						no						admission ward	same	254
405	91	male	yes	specialist	ambulatory	yellow	neurology	specialist	other	no	yes	no	no	no	no	no	no	no	0	low	no	no	no	no	0	no					no						no						admission ward	same	293
406	65	male	yes	specialist	ambulatory	green	surgery	specialist	malaise	no	yes	no	no	no	no	no	yes	no	2	low	no	no	no	no	0	no					no						no						home	same	53
407	42	male	yes	general practitioner	ambulatory	yellow	neurology	specialist	malaise	no	no	no	no	no	no	no	no	no	0	low	no	no	no	no	0	no					no						no						admission ward	same	383
408	60	male	yes	general practitioner	ambulance	green	internal medicine	specialist	other	no	no	no	no	no	no	no	no	no	0	low	no	no	no	no	0	no					no						no						home	same
409	52	female	yes	general practitioner	ambulatory	green	ED physician	ED phycisian	traumatic injury	no	no	no	no	no	no	no	no	no	0	low	no	no	no	no	0	no					no						no						outpatient follow-up	same	62
410	56	male	yes	general practitioner	ambulatory	yellow	internal medicine	specialist	malaise	yes	no	no	no	no	no	no	no	no	1	low	no	no	no	no	0	no					no						no						admission ward	same	247
411	1	male	no	specialist	ambulatory	orange	ED physician	ED phycisian	traumatic injury	no	no	no	no	no	no	no	no	no	0	low	no	no	no	yes	1	yes	surgery	admission department		yes	no						no						admission ward	same	178
412	50	male	yes	general practitioner	ambulatory	green	ED physician	ED phycisian	traumatic injury	no	no	no	no	no	no	no	no	no	0	low	no	no	no	yes	1	yes	internal medicine	admission department		yes	no						no						admission ward	same
413	2	male	no	self-refferal	ambulatory	orange	neurology	specialist	other	no	no	no	no	no	no	no	no	no	0	low	no	no	no	no	0	no					no						no						admission ward	same	193
414	29	female	yes	specialist	ambulatory	green	ED physician	ED phycisian	traumatic injury	no	no	no	no	no	no	no	no	no	0	low	no	no	no	no	0	no					no						no						home	same
415	84	male	yes	general practitioner	ambulance	yellow	other	specialist	other	yes	yes	no	no	no	no	no	yes	no	4	high	no	no	no	no	0	no					no						no						admission ward	same	139
416	34	female	yes	specialist	ambulatory	yellow	other	specialist	other	no	no	yes	no	no	no	no	no	no	1	low	no	no	no	no	0	no					no						no						admission ward	same	199
417	5	male	no	specialist	ambulatory	green	ED physician	ED phycisian	traumatic injury	no	no	no	no	no	no	no	no	no	0	low	no	no	no	no	0	no					no						no						outpatient follow-up	same	62
418	38	male	yes	general practitioner	ambulatory	green	neurology	specialist	headdache	no	no	no	no	no	no	no	no	no	0	low	no	no	no	no	0	no					no						no						home	same
419	73	female	yes	specialist	ambulatory	yellow	ED physician	ED phycisian	traumatic injury	no	no	no	no	no	no	no	yes	no	2	low	no	no	no	no	0	no					no						no						outpatient follow-up	same	87
420	0	female	no	general practitioner	ambulatory	orange	other	specialist	malaise	no	no	no	no	no	no	no	no	no	0	low	no	no	no	no	0	no					no						no						admission ward	same	148
421	69	male	yes	specialist	ambulatory	green	internal medicine	specialist	malaise	yes	no	yes	no	no	no	no	no	no	2	low	no	no	no	no	0	no					no						no						admission ward	same	217
422	0	male	no	general practitioner	ambulatory	green	other	specialist	dyspnea	no	no	no	no	no	no	no	no	no	0	low	no	no	no	no	0	no					no						no						admission ward	same	266
423	70	male	yes	general practitioner	ambulance	yellow	cardiology	specialist	chest pain	no	no	no	no	no	no	no	yes	no	0	low	no	no	no	yes	1	yes	internal medicine	exclusion diagnosis		yes	no						no						home	next
424	6	male	no	specialist	ambulatory	green	ED physician	ED phycisian	traumatic injury	no	no	no	no	no	no	no	no	no	0	low	no	no	no	no	0	no					no						no						outpatient follow-up	same	76
425	85	female	yes	self-refferal	ambulance	orange	ED physician	ED phycisian	malaise	no	no	no	no	no	no	no	no	no	1	low	no	no	no	yes	2	yes	internal medicine	admission department		yes	no	emergency physician	surgery				no						admission ward	same	225
426	65	male	yes	specialist	ambulance	orange	cardiology	specialist	chest pain	yes	no	no	no	no	no	no	yes	no	3	low	no	no	no	no	0	no					no						no						outpatient follow-up	same
427	70	male	yes	general practitioner	ambulatory	yellow	ED physician	ED phycisian	dyspnea	yes	yes	no	no	no	no	no	no	no	1	low	no	no	no	no	0	no					no						no						admission ward	same
428	67	male	yes	self-refferal	ambulance	not triaged	ED physician	ED phycisian	other	yes	yes	no	no	no	no	no	no	no	1	low	no	no	yes	no	0	no					no						no						admission ward	same	10
429	23	female	yes	general practitioner	ambulatory	green	surgery	specialist	abdominal pain	no	no	no	no	no	no	no	no	no	0	low	no	no	no	no	0	no					no						no						outpatient follow-up	same	74
430	77	male	yes	general practitioner	ambulance	yellow	cardiology	specialist	palpitations	yes	no	no	no	no	no	no	no	no	0	low	no	yes	no	no	0	no					no						no						admission ward	same
431	19	male	yes	self-refferal	ambulatory	green	ED physician	ED phycisian	abdominal pain	no	no	yes	no	no	no	no	no	no	1	low	no	no	no	no	0	no					no						no						outpatient follow-up	same	147
432	63	female	yes	self-refferal	ambulance	orange	ED physician	ED phycisian	malaise	no	no	no	no	no	no	no	yes	no	7	high	no	no	no	yes	2	yes	internal medicine	admission department		yes	no	emergency physician	cardiology	exclusion diagnosis	ACS		no						admission ward	same
433	70	male	yes	general practitioner	ambulance	orange	ED physician	ED phycisian	abdominal pain	no	no	no	no	no	no	no	yes	no	2	low	no	no	yes	no	0	no					no						no						admission ward	same	367
434	23	female	yes	general practitioner	ambulatory	green	ED physician	ED phycisian	abdominal pain	no	no	no	no	no	no	no	no	no	0	low	no	no	no	yes	2	yes	other	exclusion diagnosis		yes	no	emergency physician	surgery	other		yes	no						outpatient follow-up	same	410
435	71	male	yes	specialist	ambulatory	yellow	cardiology	specialist	dyspnea	yes	no	no	no	no	no	no	no	no	2	low	no	yes	no	no	0	no					no						no						home	same	151
436	23	female	yes	self-refferal	ambulatory	orange	ED physician	ED phycisian	other	no	no	no	no	no	no	no	no	no	0	low	no	no	no	no	0	no					no						no						home	same	151
437	60	female	yes	specialist	ambulatory	yellow	neurology	specialist	malaise	no	no	no	no	no	no	no	yes	no	2	low	no	no	no	no	0	no					no						no						outpatient follow-up	same
438	44	female	yes	general practitioner	ambulatory	yellow	surgery	specialist	abdominal pain	no	no	no	no	no	no	no	no	no	0	low	no	no	no	no	0	no					no						no						admission ward	same
439	75	male	yes	specialist	ambulatory	yellow	other	specialist	other	no	no	no	no	no	no	no	no	no	0	low	no	no	no	no	0	no					no						no						outpatient follow-up	same	130
440	54	male	yes	self-refferal	ambulatory	yellow	cardiology	specialist	dyspnea	no	no	no	no	no	no	no	no	no	0	low	no	no	no	no	0	no					no						no						outpatient follow-up	same	248
441	17	male	yes	self-refferal	ambulatory	green	ED physician	ED phycisian	other	no	no	no	no	no	no	no	no	no	0	low	no	no	no	yes	1	yes	other	specific procedure		yes	no						no						outpatient follow-up	same	59
442	38	female	yes	self-refferal	ambulatory	green	ED physician	ED phycisian	traumatic injury	no	no	no	no	no	no	no	no	no	0	low	no	no	no	no	0	no					no						no						outpatient follow-up	same	90
443	73	male	yes	specialist	ambulatory	yellow	internal medicine	specialist	malaise	no	no	no	no	no	no	no	yes	no	2	low	no	no	no	no	0	no					no						no						admission ward	same	132
444	13	male	no	general practitioner	ambulatory	orange	ED physician	ED phycisian	abdominal pain	no	no	no	no	no	no	no	no	no	0	low	no	no	no	yes	1	missed	surgery				no						no						admission ward	same	206
445	83	male	yes	general practitioner	ambulatory	orange	other	specialist	dyspnea	no	no	no	no	no	no	no	yes	no	6	high	no	no	no	no	0	no					no						no						admission ward	same	185
446	60	female	yes	specialist	ambulatory	orange	internal medicine	specialist	abdominal pain	no	no	no	no	no	no	no	no	no	0	low	no	no	no	no	0	no					no						no						admission ward	same	91
447	72	male	yes	specialist	ambulatory	yellow	internal medicine	specialist	other	no	no	no	no	no	no	no	no	no	0	low	no	no	no	yes	1	yes	neurology	exclusion diagnosis		yes	no						no						outpatient follow-up	same	321
448	68	female	yes	general practitioner	ambulatory	yellow	other	specialist	dyspnea	no	no	no	no	no	no	no	yes	no	2	low	no	no	no	no	0	no					no						no						admission ward	same	204
449	56	male	yes	self-refferal	ambulatory	green	ED physician	ED phycisian	dyspnea	no	no	no	no	no	no	no	no	no	0	low	no	no	no	no	0	no					no						no						home	same	109
450	47	male	yes	specialist	ambulatory	orange	cardiology	specialist	palpitations	no	no	no	no	no	no	no	no	no	0	low	no	no	no	yes	1	yes	emergency physician	pre-existing agreement	cardioversion	yes	no						no						home	same	206
451	84	female	yes	general practitioner	ambulatory	orange	internal medicine	specialist	other	yes	no	no	no	no	no	no	yes	no	7	high	no	no	no	no	0	no					no						no						home	same	144
452	66	male	yes	general practitioner	ambulatory	yellow	internal medicine	specialist	other	yes	no	no	no	no	no	no	no	no	1	low	no	no	no	no	0	no					no						no						admission ward	same	185
453	46	female	yes	general practitioner	ambulatory	green	cardiology	specialist	palpitations	no	yes	yes	no	no	no	no	no	no	1	low	no	no	no	no	0	no					no						no						outpatient follow-up	same	239
454	59	female	yes	specialist	ambulatory	green	internal medicine	specialist	malaise	no	no	yes	no	no	no	no	no	no	1	low	no	no	no	no	0	no					no						no						admission ward	same	279
455	53	female	yes	self-refferal	ambulatory	green	ED physician	ED phycisian	traumatic injury	no	no	no	no	no	no	no	no	no	0	low	no	no	no	no	0	no					no						no						outpatient follow-up	same	103
456	65	male	yes	specialist	ambulatory	yellow	other	specialist	other	yes	no	no	no	yes	no	no	yes	no	6	high	no	no	no	no	0	no					no						no						admission ward	same	91
457	78	male	yes	self-refferal	ambulance	orange	ED physician	ED phycisian	traumatic injury	no	no	no	no	no	no	no	no	no	0	low	no	no	yes	no	0	no					no						no						admission ward	same
458	56	male	yes	general practitioner	ambulatory	green	ED physician	ED phycisian	abdominal pain	no	no	no	no	no	no	no	no	no	0	low	no	no	no	no	0	no					no						no						outpatient follow-up	same	225
459	60	female	yes	general practitioner	ambulatory	yellow	other	specialist	dyspnea	no	no	yes	no	no	no	no	no	no	1	low	no	no	no	no	0	no					no						no						outpatient follow-up	same	177
460	79	female	yes	general practitioner	ambulatory	yellow	internal medicine	specialist	malaise	no	no	no	no	no	no	no	no	no	0	low	no	no	no	no	0	no					no						no						home	same	324
461	55	female	yes	general practitioner	ambulatory	yellow	neurology	specialist	other	no	no	no	no	no	no	no	yes	no	2	low	no	no	no	yes	1	yes	emergency physician	pre-existing agreement	trauma screening	yes	no						no						home	same	281
462	55	female	yes	general practitioner	ambulance	yellow	ED physician	ED phycisian	malaise	no	no	no	no	no	no	no	no	no	0	low	no	no	no	no	0	no					no						no						home	same	260
463	67	female	yes	self-refferal	ambulance	yellow	ED physician	ED phycisian	traumatic injury	no	yes	no	no	no	no	no	no	no	0	low	no	no	no	yes	1	yes	surgery	admission department		yes	no						no						admission ward	same	155
464	68	female	yes	general practitioner	ambulance	red	ED physician	ED phycisian	other	no	no	no	no	no	no	no	no	no	0	low	no	no	no	yes	1	yes	intensive care	admission IC		yes	no						no						admission ICU	same	99
465	65	male	yes	general practitioner	ambulatory	orange	ED physician	ED phycisian	other	no	no	no	no	no	no	no	no	no	0	low	no	no	no	yes	3	yes	internal medicine	admission department		no	no	emergency physician	other	exclusion diagnosis		yes	missed	other	neurology				home	next
466	15	male	no	self-refferal	ambulance	yellow	ED physician	ED phycisian	other	no	no	no	no	no	no	no	no	no	0	low	no	no	no	yes	1	yes	other	pre-existing agreement		yes	no						no						home	same	145
467	54	male	yes	general practitioner	ambulance	orange	ED physician	ED phycisian	traumatic injury	no	no	no	no	no	no	no	yes	no	2	low	no	no	no	no	0	no					no						no						admission ward	same	120
468	4	female	no	self-refferal	ambulance	yellow	ED physician	ED phycisian	other	no	no	no	no	no	no	no	no	no	0	low	no	no	no	yes	1	yes	other	pre-existing agreement		yes	no						no						home	same
469	73	female	yes	self-refferal	ambulance	yellow	ED physician	ED phycisian	collaps	no	yes	yes	no	no	no	no	yes	no	3	low	no	no	no	no	0	no					no						no						outpatient follow-up	same	237
470	34	male	yes	self-refferal	ambulatory	red	ED physician	ED phycisian	other	no	no	no	no	no	no	no	no	no	0	low	no	no	no	yes	1	yes	other	outpatient follow-up		yes	no						no						outpatient follow-up	same	75
471	70	male	yes	general practitioner	ambulatory	yellow	cardiology	specialist	dyspnea	yes	yes	no	no	no	no	no	yes	no	3	low	no	no	no	no	0	no					no						no						admission ward	same	220
472	91	female	yes	general practitioner	ambulance	orange	ED physician	ED phycisian	traumatic injury	no	no	no	yes	no	no	no	yes	no	3	low	no	no	no	no	0	no					no						no						outpatient follow-up	same
473	67	female	yes	specialist	ambulatory	yellow	other	specialist	other	no	no	no	no	no	no	no	no	no	0	low	no	no	no	no	0	no					no						no						outpatient follow-up	same	108
474	79	female	yes	specialist	ambulatory	green	ED physician	ED phycisian	traumatic injury	no	no	no	no	no	no	no	no	no	0	low	no	no	no	no	0	no					no						no						home	same
475	65	female	yes	general practitioner	ambulatory	yellow	internal medicine	specialist	dyspnea	yes	no	no	no	no	no	no	no	no	1	low	no	no	no	no	0	no					no						no						admission ward	next
476	76	male	yes	specialist	ambulatory	yellow	internal medicine	specialist	malaise	no	yes	no	no	no	no	no	yes	no	0	low	no	no	no	no	0	no					no						no						admission ward	same
477	61	male	yes	general practitioner	ambulatory	green	ED physician	ED phycisian	traumatic injury	yes	no	no	no	no	no	no	no	no	1	low	no	no	no	no	0	no					no						no						home	same	136
478	71	female	yes	general practitioner	ambulatory	yellow	ED physician	ED phycisian	dyspnea	no	no	no	no	no	no	no	no	no	0	low	no	no	no	yes	1	yes	internal medicine	admission department		yes	no						no						admission ward	same
479	63	male	yes	general practitioner	ambulance	orange	ED physician	ED phycisian	chest pain	no	no	no	no	no	no	no	yes	no	2	low	no	no	yes	no	0	no					no						no						admission ward	same	181
480	61	male	yes	self-refferal	ambulance	orange	cardiology	specialist	chest pain	no	yes	no	no	no	no	no	no	no	0	low	no	no	no	no	0	no					no						no						outpatient follow-up	same	192
481	91	female	yes	general practitioner	ambulance	green	neurology	specialist	traumatic injury	no	no	no	no	no	no	no	no	no	1	low	no	no	no	no	0	no					no						no						home	same
482	86	male	yes	specialist	ambulatory	yellow	internal medicine	specialist	malaise	no	no	no	no	no	no	no	no	no	0	low	no	no	no	no	0	no					no						no						admission ward	same
483	57	male	yes	general practitioner	ambulatory	yellow	surgery	specialist	other	no	no	no	no	no	no	no	no	no	0	low	no	no	no	no	0	no					no						no						outpatient follow-up	same	27
484	77	female	yes	specialist	ambulatory	yellow	internal medicine	specialist	traumatic injury	no	yes	no	no	yes	no	no	no	no	2	low	no	no	no	no	0	no					no						no						outpatient follow-up	same
485	0	male	no	general practitioner	ambulatory	orange	other	specialist	dyspnea	no	no	no	no	no	no	no	no	no	0	low	no	no	no	no	0	no					no						no						admission ward	next
486	23	female	yes	specialist	ambulatory	yellow	surgery	specialist	abdominal pain	no	no	no	no	no	no	no	no	no	0	low	no	no	no	no	0	no					no						no						admission ward	same	108
487	76	male	yes	self-refferal	ambulance	orange	ED physician	ED phycisian	palpitations	no	yes	no	no	no	no	no	no	no	1	low	no	no	no	yes	1	yes	cardiology	specific procedure	read-out of ICD	yes	no						no						admission ward	same	92
488	72	male	yes	general practitioner	ambulance	yellow	internal medicine	specialist	other	no	yes	no	no	yes	no	no	no	no	3	low	no	no	no	no	0	no					no						no						admission ward	same	166
489	73	male	yes	general practitioner	ambulatory	yellow	internal medicine	specialist	abdominal pain	no	yes	yes	no	no	no	no	yes	no	3	low	no	no	no	no	0	no					no						no						outpatient follow-up	same	354
490	0	male	no	general practitioner	ambulatory	orange	other	specialist	malaise	no	no	no	no	no	no	no	no	no	0	low	yes	yes	no	no	0	no					no						no						home	same	97
491	79	male	yes	self-refferal	ambulatory	green	ED physician	ED phycisian	traumatic injury	no	no	no	no	no	no	no	no	no	0	low	no	yes	no	no	0	no					no						no						outpatient follow-up	same	50
492	0	female	no	general practitioner	ambulatory	orange	other	specialist	dyspnea	no	no	no	no	no	no	no	no	no	0	low	no	no	no	no	0	no					no						no						admission ward	same	183
493	65	female	yes	general practitioner	ambulatory	orange	ED physician	ED phycisian	dyspnea	no	no	no	no	no	no	no	no	no	0	low	no	no	no	yes	1	yes	internal medicine	admission department		yes	no						no						admission ward	same	328
494	49	female	yes	specialist	ambulatory	yellow	other	specialist	malaise	no	no	no	no	no	no	no	yes	no	0	low	no	no	no	no	0	no					no						no						outpatient follow-up	same	127
495	0	female	no	general practitioner	ambulatory	yellow	other	specialist	malaise	no	no	no	no	no	no	no	no	no	0	low	no	no	no	no	0	no					no						no						admission ward	same	272
496	86	male	yes	general practitioner	ambulatory	yellow	ED physician	ED phycisian	abdominal pain	no	no	no	no	no	no	no	no	no	0	low	no	no	no	yes	1	yes	internal medicine	admission department		yes	no						no						admission ward	same	254
497	70	male	yes	self-refferal	ambulance	green	ED physician	ED phycisian	abdominal pain	no	no	no	no	no	no	no	yes	no	2	low	no	no	no	no	0	no					no						no						home	same	147
498	67	male	yes	specialist	ambulatory	orange	internal medicine	specialist	other	no	no	no	no	no	no	no	yes	no	6	high	no	no	no	yes	1	yes	intensive care	admission IC		yes	no						no						admission ICU	same	143
499	53	female	yes	general practitioner	ambulatory	yellow	other	specialist	other	no	no	no	no	no	no	no	no	no	0	low	no	no	no	no	0	no					no						no						home	same	52
500	31	male	yes	general practitioner	ambulatory	green	ED physician	ED phycisian	traumatic injury	no	no	no	no	no	no	no	no	no	0	low	no	no	no	no	0	no					no						no						outpatient follow-up	same	111
501	37	male	yes	general practitioner	ambulatory	yellow	cardiology	specialist	collaps	no	no	no	no	no	no	no	no	no	0	low	no	no	no	no	0	no					no						no						outpatient follow-up	same
502	71	male	yes	general practitioner	ambulatory	yellow	neurology	specialist	malaise	no	no	no	no	no	no	no	no	no	0	low	no	no	no	no	0	no					no						no						admission ward	same	133
503	0	female	no	general practitioner	ambulatory	orange	other	specialist	malaise	no	no	no	no	no	no	no	no	no	0	low	no	no	no	no	0	no					no						no						home	same	261
504	63	male	yes	specialist	ambulance	orange	internal medicine	specialist	other	no	yes	no	no	no	no	no	no	no	0	low	no	no	no	no	0	no					no						no						admission ward	same	161
505	85	male	yes	general practitioner	ambulatory	yellow	internal medicine	specialist	other	no	yes	no	no	yes	no	no	yes	no	4	high	no	no	no	no	0	no					no						no						admission ward	same	280
506	3	female	no	general practitioner	ambulatory	orange	ED physician	ED phycisian	dyspnea	no	no	no	no	no	no	no	no	no	0	low	no	no	no	no	0	no					no						no						outpatient follow-up	same	117
507	67	male	yes	self-refferal	ambulatory	yellow	surgery	specialist	traumatic injury	no	no	no	no	no	no	no	no	no	1	low	no	no	no	no	0	no					no						no						outpatient follow-up	same
508	4	male	no	general practitioner	ambulatory	orange	other	specialist	dyspnea	no	no	no	no	no	no	no	no	no	0	low	no	no	no	no	0	no					no						no						admission ward	same	202
509	0	male	no	general practitioner	ambulatory	orange	other	specialist	other	no	no	no	no	no	no	no	no	no	0	low	no	no	no	no	0	no					no						no						home	same	94
510	72	female	yes	general practitioner	ambulatory	yellow	other	specialist	other	no	yes	no	no	no	no	no	no	no	0	low	no	no	no	no	0	no					no						no						home	same
511	53	female	yes	self-refferal	ambulance	orange	ED physician	ED phycisian	traumatic injury	no	no	no	no	no	no	no	no	no	0	low	no	no	yes	no	0	no					no						no						home	same	179
512	59	female	yes	self-refferal	ambulatory	yellow	other	specialist	abdominal pain	no	no	no	no	no	no	no	no	no	0	low	no	no	no	no	0	no					no						no						home	same	92
513	0	male	no	general practitioner	ambulatory	orange	ED physician	ED phycisian	malaise	no	no	no	no	no	no	no	no	no	0	low	no	no	no	yes	1	yes	other	other		yes	no						no						outpatient follow-up	same	117
514	28	male	yes	general practitioner	ambulatory	yellow	ED physician	ED phycisian	abdominal pain	no	no	no	no	no	no	no	no	no	0	low	no	no	no	no	0	no					no						no						outpatient follow-up	same	180
515	16	male	no	self-refferal	ambulatory	yellow	ED physician	ED phycisian	other	no	no	no	no	no	no	no	no	no	0	low	no	no	no	yes	1	yes	neurology	pre-existing agreement		yes	no						no						outpatient follow-up	same	284
516	8	male	no	specialist	ambulatory	yellow	other	specialist	malaise	no	no	no	no	no	no	no	no	no	0	low	no	no	no	no	0	no					no						no						outpatient follow-up	same
517	3	male	no	general practitioner	ambulatory	orange	other	specialist	other	no	no	no	no	no	no	no	no	no	0	low	no	no	no	no	0	no					no						no						admission ward	same
518	34	male	yes	general practitioner	ambulatory	green	ED physician	ED phycisian	traumatic injury	no	no	no	no	no	no	no	no	no	0	low	no	no	no	no	0	no					no						no						outpatient follow-up	same	112
519	72	female	yes	general practitioner	ambulance	yellow	cardiology	specialist	chest pain	no	yes	no	no	no	no	no	yes	no	2	low	no	no	no	no	0	no					no						no						outpatient follow-up	same	153
520	0	male	no	self-refferal	ambulatory	orange	other	specialist	malaise	no	no	no	no	no	no	no	no	no	0	low	no	no	no	no	0	no					no						no						home	same	111
521	88	male	yes	self-refferal	ambulance	red	ED physician	ED phycisian	malaise	no	no	yes	no	no	no	no	no	no	1	low	no	no	yes	no	0	no					no						no						admission ICU	same	40
522	38	male	yes	general practitioner	ambulatory	green	ED physician	ED phycisian	dyspnea	no	no	no	no	no	no	no	no	no	1	low	no	no	no	no	0	no					no						no						home	same	82
523	35	male	yes	self-refferal	ambulance	orange	neurology	specialist	headdache	no	no	no	no	no	no	no	no	no	0	low	no	no	no	no	0	no					no						no						admission ward	same	153
524	67	female	yes	specialist	ambulance	orange	other	specialist	dyspnea	yes	no	yes	no	no	no	no	no	no	2	low	no	no	no	no	0	no					no						no						admission ward	same	160
525	11	female	no	self-refferal	ambulance	orange	ED physician	ED phycisian	traumatic injury	no	no	no	no	no	no	no	no	no	0	low	no	no	no	no	0	no					no						no						outpatient follow-up	same
526	60	male	yes	general practitioner	ambulatory	yellow	other	specialist	other	no	yes	no	no	no	no	no	no	no	0	low	no	no	no	no	0	no					no						no						outpatient follow-up	same	86
527	1	female	no	specialist	ambulatory	orange	other	specialist	malaise	no	no	no	no	no	no	no	no	no	0	low	no	no	no	no	0	no					no						no						admission ward	same
528	63	male	yes	specialist	ambulatory	yellow	internal medicine	specialist	abdominal pain	yes	no	no	no	no	no	no	no	no	1	low	no	no	no	no	0	no					no						no						admission ward	next
529	74	female	yes	self-refferal	ambulatory	green	ED physician	ED phycisian	other	no	yes	no	no	yes	no	no	no	no	2	low	no	no	no	yes	1	yes	neurology	pre-existing agreement		yes	no						no						home	same
530	32	female	yes	general practitioner	ambulatory	orange	ED physician	ED phycisian	abdominal pain	no	no	no	no	no	no	no	no	no	0	low	no	no	no	no	0	no					no						no						outpatient follow-up	same
531	80	female	yes	general practitioner	ambulance	yellow	neurology	specialist	malaise	no	yes	no	no	no	no	no	no	no	0	low	no	no	no	no	0	no					no						no						home	same
532	54	female	yes	self-refferal	ambulatory	green	ED physician	ED phycisian	malaise	no	yes	no	no	no	no	no	no	no	0	low	no	no	no	no	0	no					no						no						home	same	84
533	36	male	yes	general practitioner	ambulatory	orange	cardiology	specialist	chest pain	no	no	no	no	no	no	no	no	no	0	low	no	no	no	no	0	no					no						no						home	same
534	44	female	yes	self-refferal	ambulatory	green	ED physician	ED phycisian	other	no	no	no	no	no	no	no	yes	no	6	high	no	no	no	yes	1	yes	neurology	exclusion diagnosis		yes	no						no						admission ward	same	151
535	87	female	yes	self-refferal	ambulance	yellow	ED physician	ED phycisian	other	no	yes	no	no	no	no	no	yes	yes	1	low	no	no	no	yes	1	yes	cardiology	admission department		yes	no						no						admission ward	same	231
536	46	female	yes	specialist	ambulatory	green	surgery	specialist	malaise	no	no	no	no	no	no	no	no	no	0	low	no	no	no	no	0	no					no						no						outpatient follow-up	same	19
537	49	female	yes	specialist	ambulance	yellow	internal medicine	specialist	malaise	no	no	no	no	no	no	no	yes	yes	0	low	no	no	no	no	0	no					no						no						admission ward	same	199
538	41	female	yes	self-refferal	ambulance	yellow	ED physician	ED phycisian	dyspnea	no	no	yes	no	no	no	no	no	no	1	low	no	no	no	yes	1	yes	other	other		yes	no						no						admission ward	same	156
539	55	male	yes	self-refferal	ambulatory	green	cardiology	specialist	malaise	yes	yes	yes	no	no	no	no	no	no	4	high	no	no	no	no	0	no					no						no						outpatient follow-up	same	169
540	28	male	yes	specialist	ambulatory	yellow	ED physician	ED phycisian	abdominal pain	no	no	no	no	no	no	no	no	no	0	low	no	no	no	yes	1	yes	surgery	outpatient follow-up		no	no						no						home	same	158
541	40	female	yes	self-refferal	ambulance	yellow	ED physician	ED phycisian	other	no	no	no	yes	no	no	no	no	no	0	low	no	no	no	yes	2	yes	other	specific procedure	operation	yes	no	other	neurology	other		no	no						admission ward	same	225
542	28	male	yes	self-refferal	ambulatory	yellow	ED physician	ED phycisian	other	no	no	no	no	no	no	no	no	no	0	low	no	no	no	no	0	no					no						no						outpatient follow-up	same
543	51	male	yes	general practitioner	ambulatory	yellow	other	specialist	malaise	no	no	no	no	no	no	no	no	no	0	low	no	no	no	yes	1	yes	surgery	other		yes	no						no						admission ward	same	372
544	48	female	yes	general practitioner	ambulatory	green	other	specialist	other	no	no	no	no	no	no	no	no	no	0	low	no	no	no	no	0	no					no						no						home	same	514
545	89	male	yes	self-refferal	ambulance	orange	ED physician	ED phycisian	other	yes	yes	no	no	no	no	no	no	no	3	low	no	no	yes	no	0	no					no						no						home	same	163
546	48	female	yes	self-refferal	ambulance	green	ED physician	ED phycisian	other	no	no	yes	no	no	no	no	no	no	1	low	no	no	no	no	0	no					no						no						home	same	69
547	73	female	yes	specialist	ambulatory	yellow	internal medicine	specialist	malaise	no	no	no	no	no	no	no	yes	no	4	high	no	yes	no	yes	1	yes	other	specific procedure		no	no						no						admission ward	same	253
548	2	female	no	specialist	ambulatory	green	other	specialist	other	yes	no	no	yes	no	no	no	no	no	0	low	no	no	no	no	0	no					no						no						outpatient follow-up	same
549	61	male	yes	general practitioner	ambulance	green	cardiology	specialist	chest pain	no	yes	no	no	no	no	no	no	no	0	low	no	no	no	no	0	no					no						no						home	same	296
550	57	male	yes	specialist	ambulance	orange	internal medicine	specialist	other	no	no	yes	no	no	no	no	yes	no	7	high	no	no	no	no	0	no					no						no						admission ward	same	224
551	66	male	yes	general practitioner	ambulance	yellow	ED physician	ED phycisian	other	yes	yes	yes	no	no	no	no	yes	no	1	low	no	no	no	no	0	no					no						no						outpatient follow-up	same	281
552	13	male	no	self-refferal	ambulatory	green	ED physician	ED phycisian	traumatic injury	no	no	no	no	no	no	no	no	no	0	low	no	no	no	no	0	no					no						no						outpatient follow-up	same	77
553	3	male	no	self-refferal	ambulatory	orange	ED physician	ED phycisian	other	no	no	no	no	no	no	no	no	no	0	low	no	no	no	yes	1	yes	neurology	pre-existing agreement		yes	no						no						admission ward	same	166
554	50	female	yes	general practitioner	ambulatory	yellow	internal medicine	specialist	malaise	no	no	no	no	no	no	no	no	no	0	low	no	no	no	no	0	no					no						no						home	same	172
555	63	female	yes	self-refferal	ambulance	orange	ED physician	ED phycisian	chest pain	no	yes	no	no	no	no	no	no	no	0	low	no	no	no	yes	1	yes	cardiology	other		no	no						no						outpatient follow-up	same	247
556	47	female	yes	specialist	ambulatory	yellow	other	specialist	other	no	no	no	no	no	no	no	no	no	0	low	no	no	no	no	0	no					no						no						outpatient follow-up	same	24
557	0	male	no	specialist	ambulatory	yellow	other	specialist	malaise	no	no	no	no	no	no	no	no	no	0	low	no	no	no	no	0	no					no						no						home	same	108
558	63	male	yes	general practitioner	ambulatory	yellow	internal medicine	specialist	malaise	no	yes	no	no	no	no	no	no	no	0	low	no	no	no	no	0	no					no						no						admission ward	same	350
559	6	female	no	specialist	ambulatory	green	ED physician	ED phycisian	traumatic injury	no	no	no	no	no	no	no	no	no	0	low	no	no	no	no	0	no					no						no						outpatient follow-up	same	53
560	0	male	no	general practitioner	ambulatory	green	other	specialist	malaise	no	no	no	no	no	no	no	no	no	0	low	no	no	no	no	0	no					no						no						home	same	166
561	75	male	yes	general practitioner	ambulance	yellow	internal medicine	specialist	malaise	no	no	no	yes	no	no	no	no	no	0	low	no	no	no	yes	1	yes	neurology	other		no	no						no						admission ward	same	277
562	22	female	yes	general practitioner	ambulance	yellow	internal medicine	specialist	abdominal pain	no	no	no	no	no	no	no	no	no	0	low	no	no	no	no	0	no					no						no						home	same	158
563	12	female	no	specialist	ambulatory	green	ED physician	ED phycisian	traumatic injury	no	no	no	no	no	no	no	no	no	0	low	no	no	no	no	0	no					no						no						outpatient follow-up	same	66
564	61	female	yes	general practitioner	ambulance	orange	cardiology	specialist	chest pain	no	yes	no	no	no	no	no	no	no	0	low	no	no	no	no	0	no					no						no						outpatient follow-up	same	183
565	63	female	yes	general practitioner	ambulatory	orange	surgery	specialist	abdominal pain	no	no	no	no	no	no	no	no	no	0	low	no	no	no	no	0	no					no						no						home	same	117
566	42	female	yes	general practitioner	ambulatory	orange	internal medicine	specialist	malaise	no	no	yes	no	no	no	no	no	no	1	low	no	no	no	yes	1	yes	intensive care	admission IC		no	no						no						admission ward	same	305
567	19	female	yes	self-refferal	ambulatory	blue	ED physician	ED phycisian	other	no	no	no	no	no	no	no	no	no	0	low	no	no	no	yes	1	yes	neurology	admission department		no	no						no						outpatient follow-up	same	215
568	27	female	yes	self-refferal	ambulatory	blue	ED physician	ED phycisian	abdominal pain	no	no	no	no	no	no	no	no	no	0	low	no	no	no	no	0	no					no						no						outpatient follow-up	same	183
569	55	female	yes	general practitioner	ambulatory	green	internal medicine	specialist	traumatic injury	no	yes	no	no	no	no	no	no	no	1	low	no	no	no	no	0	no					no						no						outpatient follow-up	same
570	29	male	yes	self-refferal	ambulatory	yellow	ED physician	ED phycisian	traumatic injury	no	no	no	no	no	no	no	no	no	0	low	no	no	no	no	0	no					no						no						home	same	70
571	81	female	yes	general practitioner	ambulatory	orange	cardiology	specialist	palpitations	no	yes	yes	no	no	no	no	no	no	1	low	no	no	no	no	0	no					no						no						outpatient follow-up	same	149
572	19	female	yes	general practitioner	ambulatory	orange	other	specialist	malaise	no	no	no	yes	no	no	no	yes	yes	3	low	no	no	no	no	0	no					no						no						outpatient follow-up	next
573	4	female	no	self-refferal	ambulatory	green	ED physician	ED phycisian	malaise	no	no	no	no	no	no	no	no	no	0	low	no	no	no	no	0	no					no						no						home	same	63
574	2	male	no	specialist	ambulatory	green	ED physician	ED phycisian	traumatic injury	no	no	no	no	no	no	no	no	no	0	low	no	no	no	no	0	no					no						no						outpatient follow-up	same	120
575	80	female	yes	general practitioner	ambulatory	orange	internal medicine	specialist	other	no	yes	no	no	no	no	no	no	no	0	low	no	no	no	no	0	no					no						no						admission ward	next
576	56	male	yes	specialist	ambulatory	orange	other	specialist	other	no	no	no	no	no	no	no	no	no	1	low	no	no	no	no	0	no					no						no						outpatient follow-up	same
577	73	male	yes	self-refferal	ambulance	orange	ED physician	ED phycisian	malaise	no	yes	no	no	no	no	yes	yes	no	0	low	no	no	yes	no	0	no					no						no						admission ward	same	20
578	0	male	no	general practitioner	ambulatory	green	other	specialist	malaise	no	no	no	no	no	no	no	no	no	0	low	no	no	no	no	0	no					no						no						home	same	129
579	0	female	no	general practitioner	ambulatory	orange	other	specialist	dyspnea	no	no	no	no	no	no	no	no	no	0	low	no	no	no	no	0	no					no						no						home	same	119
580	65	female	yes	general practitioner	ambulance	yellow	ED physician	ED phycisian	other	no	no	no	no	no	no	no	no	no	1	low	no	no	no	yes	1	yes	other	other		yes	no						no						admission ward	same	130
581	64	female	yes	specialist	ambulatory	yellow	other	specialist	malaise	no	no	no	no	no	no	no	yes	no	2	low	no	no	no	no	0	no					no						no						admission ward	next
582	68	male	yes	general practitioner	ambulance	orange	ED physician	ED phycisian	dyspnea	no	yes	no	no	no	no	no	no	no	0	low	no	no	no	yes	2	yes	internal medicine	admission department		yes	no	internal medicine	intensive care				no						admission ICU	next
583	25	female	yes	general practitioner	ambulatory	yellow	internal medicine	specialist	other	no	no	no	no	no	no	no	no	no	0	low	no	no	no	no	0	no					no						no						admission ward	next
584	83	male	yes	self-refferal	ambulance	orange	ED physician	ED phycisian	malaise	yes	yes	no	no	no	no	yes	no	no	2	low	no	no	yes	no	0	no					no						no						admission ward	same	5
585	68	male	yes	general practitioner	ambulance	orange	internal medicine	specialist	malaise	yes	yes	no	no	yes	no	no	yes	no	2	low	no	no	no	no	0	no					no						no						admission ward	next
586	62	male	yes	self-refferal	ambulance	red	ED physician	ED phycisian	malaise	no	no	no	no	no	no	no	no	no	0	low	no	no	yes	no	0	no					no						no						admission ward	same	11
587	4	female	no	general practitioner	ambulatory	orange	ED physician	ED phycisian	other	no	no	no	no	no	no	no	no	no	0	low	no	no	no	no	0	no					no						no						home	same	94
588	37	male	yes	general practitioner	ambulatory	green	ED physician	ED phycisian	traumatic injury	no	no	no	yes	no	no	no	no	no	0	low	no	no	no	no	0	no					no						no						outpatient follow-up	same
589	17	male	yes	specialist	ambulatory	not triaged	ED physician	ED phycisian	other	no	no	no	no	no	no	no	no	no	0	low	no	no	no	no	0	no					no						no						outpatient follow-up	same
590	74	male	yes	self-refferal	ambulance	orange	ED physician	ED phycisian	dyspnea	no	yes	yes	yes	no	no	no	no	no	3	low	no	no	no	yes	1	yes	other	specific procedure		yes	no						no						admission ward	next
591	94	female	yes	self-refferal	ambulance	green	ED physician	ED phycisian	other	no	yes	no	no	yes	no	no	no	no	3	low	no	no	no	yes	1	yes	neurology	pre-existing agreement		yes	no						no						admission ward	same	206
592	20	female	yes	general practitioner	ambulatory	green	surgery	specialist	abdominal pain	no	no	no	no	no	no	no	no	no	0	low	no	no	no	yes	1	yes	other	exclusion diagnosis		yes	no						no						outpatient follow-up	same
593	55	male	yes	general practitioner	ambulance	yellow	cardiology	specialist	chest pain	yes	no	no	no	no	no	no	no	no	1	low	no	no	no	no	0	no					no						no						admission ward	same	245
594	81	male	yes	self-refferal	ambulance	orange	ED physician	ED phycisian	chest pain	no	yes	no	yes	no	no	no	yes	no	8	high	no	no	yes	no	0	no					no						no						admission ICU	same	543
595	35	male	yes	self-refferal	ambulatory	green	ED physician	ED phycisian	other	no	no	no	no	no	no	no	no	no	0	low	no	no	no	no	0	no					no						no						home	same	122
596	29	male	yes	self-refferal	ambulance	red	ED physician	ED phycisian	other	no	no	no	no	no	no	no	no	no	0	low	no	no	yes	no	0	no					no						no						admission ICU	same	134
597	30	female	yes	general practitioner	ambulatory	yellow	neurology	specialist	other	no	no	no	no	no	no	no	no	yes	0	low	no	no	no	no	0	no					no						no						home	same	126
598	26	male	yes	self-refferal	ambulatory	yellow	cardiology	specialist	chest pain	no	no	no	no	no	no	no	no	no	0	low	no	no	no	no	0	no					no						no						outpatient follow-up	same	218
599	63	male	yes	specialist	ambulatory	yellow	internal medicine	specialist	abdominal pain	yes	yes	no	no	no	no	no	yes	no	8	high	no	no	no	yes	1	yes	surgery	exclusion diagnosis		yes	no						no						admission ward	same	231
600	64	male	yes	general practitioner	ambulance	yellow	internal medicine	specialist	chest pain	no	no	yes	yes	no	no	no	yes	no	3	low	no	no	no	yes	1	yes	other	specific procedure		yes	no						no						admission ward	same	152
601	3	female	no	self-refferal	ambulatory	yellow	ED physician	ED phycisian	traumatic injury	no	no	no	no	no	no	no	no	no	0	low	no	no	no	no	0	no					no						no						home	same
602	93	male	yes	general practitioner	ambulance	yellow	ED physician	ED phycisian	malaise	yes	yes	no	no	no	no	no	yes	no	5	high	no	no	no	no	0	no					no						no						admission ward	same	197
603	66	female	yes	general practitioner	ambulatory	yellow	internal medicine	specialist	malaise	no	yes	no	no	yes	no	no	yes	no	3	low	no	no	no	no	0	no					no						no						admission ward	same	221
604	61	female	yes	self-refferal	ambulatory	green	ED physician	ED phycisian	other	no	no	yes	no	no	no	no	no	no	1	low	no	no	no	no	0	no					no						no						home	same	98
605	51	female	yes	general practitioner	ambulance	orange	surgery	specialist	traumatic injury	no	yes	no	no	no	no	no	no	no	2	low	no	no	no	no	0	no					no						no						admission ward	same
606	65	male	yes	specialist	ambulatory	yellow	internal medicine	specialist	abdominal pain	no	no	no	no	no	no	no	yes	no	6	high	no	no	no	no	0	no					no						no						outpatient follow-up	same	162
607	75	female	yes	self-refferal	ambulatory	yellow	ED physician	ED phycisian	malaise	yes	yes	no	no	no	no	no	yes	no	6	high	no	no	no	yes	2	yes	cardiology	exclusion diagnosis	ACS	no	no	emergency physician	internal medicine	exclusion diagnosis		yes	no						outpatient follow-up	same	414
608	13	female	no	self-refferal	ambulatory	green	ED physician	ED phycisian	traumatic injury	no	no	no	no	no	no	no	no	no	0	low	no	no	no	no	0	no					no						no						outpatient follow-up	same	81
609	49	male	yes	general practitioner	ambulance	orange	cardiology	specialist	chest pain	yes	no	no	no	no	no	no	no	no	2	low	no	no	no	no	0	no					no						no						home	same	126
610	36	female	yes	self-refferal	ambulatory	orange	ED physician	ED phycisian	malaise	no	no	no	no	no	no	no	no	no	0	low	no	no	no	yes	1	yes	neurology	exclusion diagnosis		yes	no						no						home	same	94
611	68	male	yes	general practitioner	ambulance	yellow	cardiology	specialist	chest pain	yes	no	no	no	no	no	yes	yes	no	1	low	no	yes	no	no	0	no					no						no						admission ward	same	158
612	61	female	yes	self-refferal	ambulance	yellow	ED physician	ED phycisian	malaise	no	no	yes	no	no	no	no	yes	no	4	high	no	no	no	yes	1	yes	neurology	exclusion diagnosis		yes	no						no						home	same	169
613	54	female	yes	self-refferal	ambulance	yellow	ED physician	ED phycisian	collaps	no	no	no	no	no	no	yes	yes	no	0	low	no	no	no	no	0	no					no						no						home	same	76
614	13	female	no	self-refferal	ambulatory	green	ED physician	ED phycisian	traumatic injury	no	no	yes	no	no	no	no	no	no	1	low	no	no	no	no	0	no					no						no						home	same	85
615	41	male	yes	self-refferal	ambulatory	yellow	ED physician	ED phycisian	collaps	no	no	no	no	no	no	no	no	no	0	low	no	no	no	no	0	no					no						no						outpatient follow-up	same	112
616	73	male	yes	specialist	ambulatory	orange	internal medicine	specialist	chest pain	yes	yes	yes	no	no	no	yes	yes	no	8	high	no	no	no	yes	1	yes	cardiology	other		yes	no						no						admission ward	same	256
617	40	male	yes	self-refferal	ambulatory	green	ED physician	ED phycisian	traumatic injury	no	no	no	no	no	no	no	no	no	0	low	yes	yes	no	no	0	no					no						no						outpatient follow-up	same	148
618	81	female	yes	self-refferal	ambulance	yellow	ED physician	ED phycisian	other	no	no	no	no	no	no	no	no	no	0	low	no	no	no	no	0	no					no						no						outpatient follow-up	same	125
619	24	male	yes	general practitioner	ambulatory	yellow	surgery	specialist	abdominal pain	no	no	no	no	no	no	no	no	no	0	low	no	no	no	no	0	no					no						no						outpatient follow-up	same	132
620	78	female	yes	general practitioner	ambulance	yellow	neurology	specialist	other	yes	yes	no	no	no	no	no	no	no	2	low	no	no	no	no	0	no					no						no						home	same	115
621	81	female	yes	self-refferal	ambulatory	yellow	ED physician	ED phycisian	other	no	no	no	no	no	no	no	yes	no	2	low	no	no	no	yes	1	yes	surgery	admission department		yes	no						no						admission ward	same	365
622	28	female	yes	general practitioner	ambulatory	yellow	surgery	specialist	abdominal pain	no	no	no	no	no	no	no	no	no	0	low	no	no	no	no	0	no					no						no						home	same	270
623	46	male	yes	general practitioner	ambulance	yellow	other	specialist	malaise	no	no	no	no	no	no	no	yes	no	2	low	no	no	no	no	0	no					no						no						admission ward	same	174
624	23	female	yes	self-refferal	ambulance	orange	ED physician	ED phycisian	abdominal pain	no	no	no	no	no	no	no	no	no	0	low	no	no	yes	no	0	no					no						no						outpatient follow-up	same	281
625	71	male	yes	self-refferal	ambulatory	orange	ED physician	ED phycisian	palpitations	yes	no	no	no	no	no	no	no	no	0	low	no	no	no	no	0	no					no						no						home	same	138
626	41	male	yes	general practitioner	ambulatory	yellow	neurology	specialist	other	no	no	no	yes	no	no	no	yes	no	2	low	no	no	no	no	0	no					no						no						outpatient follow-up	same
627	53	male	yes	general practitioner	ambulatory	yellow	cardiology	specialist	collaps	no	no	no	no	no	no	yes	no	no	0	low	no	no	no	yes	1	yes	emergency physician	pre-existing agreement	trauma screening	yes	no						no						admission ward	same	227
628	82	female	yes	general practitioner	ambulance	yellow	neurology	specialist	collaps	no	yes	no	no	no	no	no	no	no	0	low	no	no	no	no	0	no					no						no						home	same	186
629	17	female	yes	specialist	ambulatory	green	ED physician	ED phycisian	traumatic injury	no	no	no	no	no	no	no	no	no	0	low	no	no	no	no	0	no					no						no						home	same	44
630	27	female	yes	general practitioner	ambulatory	orange	cardiology	specialist	chest pain	no	no	no	no	no	no	no	no	no	0	low	no	no	no	no	0	no					no						no						home	same
631	62	female	yes	general practitioner	ambulance	orange	ED physician	ED phycisian	collaps	no	no	no	no	no	no	no	no	no	0	low	no	no	yes	no	0	no					no						no						admission ward	same
632	83	male	yes	general practitioner	ambulance	yellow	internal medicine	specialist	malaise	yes	yes	no	no	no	no	no	yes	no	4	high	no	no	no	no	0	no					no						no						admission ward	same
633	36	female	yes	self-refferal	ambulance	orange	ED physician	ED phycisian	traumatic injury	no	no	no	no	no	no	no	no	no	0	low	no	no	yes	no	0	no					no						no						home	same	71
634	66	female	yes	specialist	ambulance	orange	internal medicine	specialist	dyspnea	no	no	yes	no	no	no	no	yes	no	1	low	no	no	no	no	0	no					no						no						admission ward	same	181
635	2	male	no	general practitioner	ambulatory	green	other	specialist	other	no	no	no	no	no	no	no	no	no	0	low	no	no	no	no	0	no					no						no						home	same	36
636	74	female	yes	general practitioner	ambulance	yellow	ED physician	ED phycisian	malaise	no	no	no	no	no	no	yes	no	no	1	low	no	no	yes	no	0	no					no						no						admission ward	same	22
637	53	female	yes	self-refferal	ambulance	yellow	ED physician	ED phycisian	other	no	no	no	no	no	no	no	no	no	0	low	no	no	no	no	0	no					no						no						home	same	46
638	87	female	yes	self-refferal	ambulance	yellow	ED physician	ED phycisian	headdache	yes	no	yes	no	no	no	no	yes	no	4	high	no	no	yes	no	0	no					no						no						admission ward	same	90
639	79	male	yes	self-refferal	ambulance	yellow	ED physician	ED phycisian	malaise	yes	yes	no	no	no	no	no	no	no	3	low	no	no	no	yes	2	missed	internal medicine				no	internal medicine	neurology	exclusion diagnosis		no	no						admission ward	next
640	49	female	yes	self-refferal	ambulance	orange	ED physician	ED phycisian	chest pain	no	yes	no	no	no	no	no	no	no	0	low	no	no	no	yes	1	yes	cardiology	exclusion diagnosis		yes	no						no						outpatient follow-up	next
641	50	female	yes	general practitioner	ambulatory	orange	cardiology	specialist	chest pain	no	no	no	no	no	no	yes	no	no	1	low	no	no	no	no	0	no					no						no						home	same	98
642	48	male	yes	general practitioner	ambulatory	green	ED physician	ED phycisian	traumatic injury	no	no	no	no	no	no	no	no	no	0	low	no	no	no	no	0	no					no						no						home	same	99
643	11	male	no	self-refferal	ambulance	orange	ED physician	ED phycisian	other	no	no	no	no	no	no	no	no	no	0	low	no	no	yes	no	0	no					no						no						home	same	71
644	32	male	yes	specialist	ambulatory	yellow	ED physician	ED phycisian	other	no	no	no	no	no	no	no	no	no	0	low	no	no	no	yes	2	yes	neurology	pre-existing agreement	CT-cerebrum	yes	no	emergency physician	other	other		yes	no						outpatient follow-up	same	311
645	55	male	yes	general practitioner	ambulance	orange	ED physician	ED phycisian	chest pain	no	yes	no	no	no	no	no	yes	no	3	low	no	no	no	no	0	no					no						no						home	same	118
646	20	male	yes	general practitioner	ambulatory	blue	ED physician	ED phycisian	traumatic injury	no	no	no	no	no	no	no	no	no	0	low	no	no	no	no	0	no					no						no						home	same
647	20	female	yes	self-refferal	ambulatory	yellow	ED physician	ED phycisian	traumatic injury	no	no	no	no	no	no	no	no	no	0	low	no	no	no	no	0	no					no						no						home	same	39
648	39	female	yes	self-refferal	ambulance	yellow	ED physician	ED phycisian	abdominal pain	no	no	no	no	no	no	no	no	no	0	low	no	no	no	no	0	no					no						no						home	same	152
649	36	female	yes	specialist	ambulatory	yellow	other	specialist	dyspnea	no	no	yes	no	no	no	no	no	no	1	low	no	no	no	no	0	no					no						no						home	same	225
650	62	male	yes	general practitioner	ambulance	orange	other	specialist	dyspnea	yes	yes	no	yes	no	no	no	yes	no	4	high	no	no	no	yes	2	yes	cardiology	other		yes	no	cardiology	emergency physician	pre-existing agreement	cardioversion	yes	no						admission ward	same	194
651	71	male	yes	general practitioner	ambulatory	green	internal medicine	specialist	traumatic injury	no	no	no	no	no	yes	no	yes	no	9	high	no	no	no	no	0	no					no						no						outpatient follow-up	same	153
652	48	male	yes	general practitioner	ambulatory	green	ED physician	ED phycisian	abdominal pain	no	no	yes	no	no	no	no	no	no	1	low	no	no	no	yes	1	yes	surgery	outpatient follow-up		yes	no						no						outpatient follow-up	same	195
653	28	female	yes	general practitioner	ambulatory	green	ED physician	ED phycisian	abdominal pain	no	no	no	no	no	no	no	no	no	0	low	no	no	no	no	0	no					no						no						outpatient follow-up	same	228
654	41	female	yes	specialist	ambulatory	yellow	internal medicine	specialist	malaise	no	no	no	no	no	no	no	yes	no	6	high	no	no	no	no	0	no					no						no						admission ward	same	238
655	50	female	yes	self-refferal	ambulatory	green	ED physician	ED phycisian	traumatic injury	no	no	no	no	no	no	no	no	no	0	low	no	no	no	no	0	no					no						no						home	same	54
656	5	male	no	specialist	ambulatory	green	ED physician	ED phycisian	traumatic injury	no	no	no	no	no	no	no	no	no	0	low	no	no	no	no	0	no					no						no						outpatient follow-up	same	71
657	81	male	yes	specialist	ambulatory	yellow	other	specialist	dyspnea	yes	yes	no	no	no	no	no	no	no	1	low	no	no	no	no	0	no					no						no						outpatient follow-up	same
658	95	female	yes	specialist	ambulatory	green	ED physician	ED phycisian	traumatic injury	yes	no	no	yes	no	no	no	no	no	3	low	no	no	no	yes	1	yes	neurology	pre-existing agreement	CT-cerebrum	yes	no						no						outpatient follow-up	same	193
659	68	female	yes	self-refferal	ambulatory	yellow	other	specialist	dyspnea	yes	yes	yes	no	no	no	yes	yes	no	3	low	no	no	no	no	0	no					no						no						admission ward	same	209
660	79	male	yes	self-refferal	ambulatory	orange	ED physician	ED phycisian	collaps	no	yes	no	yes	no	no	no	yes	no	5	high	no	no	yes	no	0	no					no						no						home	same	339
661	74	female	yes	general practitioner	ambulance	yellow	neurology	specialist	other	yes	yes	no	no	yes	no	no	no	no	3	low	no	no	no	no	0	no					no						no						home	same	176
662	73	female	yes	general practitioner	ambulatory	yellow	internal medicine	specialist	dyspnea	no	no	no	no	no	no	no	no	no	1	low	no	no	no	no	0	no					no						no						admission ward	same	221
663	47	female	yes	specialist	ambulatory	green	ED physician	ED phycisian	traumatic injury	no	no	no	yes	no	no	no	no	no	0	low	no	no	no	yes	1	yes	other	pre-existing agreement		yes	no						no						outpatient follow-up	same
664	67	male	yes	self-refferal	ambulatory	orange	ED physician	ED phycisian	chest pain	yes	yes	no	no	yes	no	no	yes	no	7	high	no	no	no	no	0	no					no						no						home	same	115
665	50	male	yes	general practitioner	ambulatory	yellow	internal medicine	specialist	malaise	no	yes	no	no	no	no	no	no	no	1	low	no	no	no	no	0	no					no						no						admission ward	same	163
666	36	male	yes	general practitioner	ambulatory	green	ED physician	ED phycisian	abdominal pain	no	no	no	no	no	no	no	no	no	0	low	no	no	no	yes	1	yes	surgery	specific procedure	operation	yes	no						no						admission ward	same
667	66	male	yes	general practitioner	ambulatory	orange	cardiology	specialist	dyspnea	no	yes	no	no	no	no	no	no	no	0	low	no	no	no	no	0	no					no						no						admission ward	same	232
668	64	male	yes	general practitioner	ambulance	orange	ED physician	ED phycisian	dyspnea	no	yes	no	no	no	no	yes	no	no	1	low	no	no	yes	no	0	no					no						no						admission ward	same	48
669	37	female	yes	general practitioner	ambulatory	yellow	internal medicine	specialist	abdominal pain	no	no	no	no	no	no	no	no	no	1	low	no	no	no	yes	1	yes	other	specific procedure		yes	no						no						outpatient follow-up	next
670	76	male	yes	general practitioner	ambulatory	yellow	neurology	specialist	malaise	no	yes	no	no	no	no	no	no	no	0	low	no	no	no	no	0	no					no						no						admission ward	same	238
671	82	female	yes	general practitioner	ambulatory	green	ED physician	ED phycisian	traumatic injury	no	no	no	no	no	no	no	no	no	0	low	no	no	no	yes	1	yes	surgery	outpatient follow-up		no	no						no						outpatient follow-up	same	141
672	49	male	yes	general practitioner	ambulance	yellow	ED physician	ED phycisian	malaise	no	yes	no	no	no	no	no	no	no	0	low	no	no	no	yes	2	yes	other	admission department		yes	no	emergency physician	surgery	admission department		yes	no						admission ward	same
673	82	female	yes	self-refferal	ambulance	green	ED physician	ED phycisian	other	no	no	no	yes	no	no	no	no	no	1	low	no	no	no	no	0	no					no						no						home	same	186
674	2	male	no	specialist	ambulatory	orange	other	specialist	malaise	no	no	no	no	no	no	no	yes	no	0	low	no	no	no	no	0	no					no						no						home	same	165
675	82	male	yes	general practitioner	ambulatory	orange	other	specialist	dyspnea	no	no	yes	no	no	no	no	no	no	1	low	no	no	no	no	0	no					no						no						admission ward	same	172
676	23	male	yes	general practitioner	ambulatory	green	surgery	specialist	abdominal pain	no	no	no	no	no	no	no	no	no	0	low	no	no	no	no	0	no					no						no						outpatient follow-up	same
677	17	male	yes	self-refferal	ambulatory	green	ED physician	ED phycisian	traumatic injury	no	no	no	no	no	no	no	no	no	0	low	no	no	no	no	0	no					no						no						home	same
678	12	male	no	general practitioner	ambulatory	green	neurology	specialist	headdache	no	no	no	no	no	no	no	no	no	0	low	no	no	no	no	0	no					no						no						home	same	162
679	4	female	no	general practitioner	ambulatory	orange	other	specialist	malaise	no	no	no	no	no	no	no	no	no	0	low	no	no	no	no	0	no					no						no						home	same
680	53	female	yes	self-refferal	ambulance	red	ED physician	ED phycisian	malaise	no	no	no	no	no	no	no	no	no	0	low	no	no	yes	no	0	no					no						no						admission ward	same	25
681	7	female	no	general practitioner	ambulatory	green	other	specialist	malaise	no	no	yes	no	no	no	no	no	no	1	low	no	no	no	no	0	no					no						no						outpatient follow-up	same	97
682	75	male	yes	self-refferal	ambulance	yellow	ED physician	ED phycisian	traumatic injury	yes	yes	no	no	no	no	no	no	no	0	low	no	no	no	yes	1	yes	other	specific procedure		yes	no						no						admission ward	same	197
683	61	male	yes	self-refferal	ambulance	orange	ED physician	ED phycisian	malaise	no	yes	no	no	no	no	no	no	no	1	low	no	no	yes	no	0	no					no						no						home	same	158
684	48	male	yes	specialist	ambulance	yellow	other	specialist	malaise	no	no	no	yes	no	no	no	no	no	2	low	no	no	no	yes	1	yes	other	admission department		yes	no						no						admission ward	same	124
685	57	male	yes	self-refferal	ambulatory	yellow	ED physician	ED phycisian	malaise	no	no	yes	no	no	no	no	yes	no	3	low	no	no	no	no	0	no					no						no						home	same	90
686	82	female	yes	general practitioner	ambulance	yellow	other	specialist	traumatic injury	no	no	no	no	no	no	no	no	no	0	low	no	no	no	no	0	no					no						no						admission ward	same
687	65	female	yes	self-refferal	ambulance	orange	cardiology	specialist	dyspnea	yes	yes	no	no	no	no	no	no	no	3	low	no	no	no	no	0	no					no						no						admission ward	same
688	80	female	yes	general practitioner	ambulance	orange	ED physician	ED phycisian	dyspnea	yes	no	no	no	no	no	no	no	no	1	low	no	no	no	yes	1	yes	cardiology	other		yes	no						no						admission ward	same	314
689	95	male	yes	self-refferal	ambulatory	yellow	ED physician	ED phycisian	other	no	no	no	no	no	no	no	no	no	0	low	no	no	no	yes	1	yes	neurology	pre-existing agreement	CT-cerebrum	yes	no						no						home	same	137
690	78	male	yes	specialist	ambulatory	yellow	cardiology	specialist	palpitations	yes	yes	no	no	no	no	no	no	no	2	low	no	no	no	yes	1	yes	emergency physician	pre-existing agreement	cardioversion	yes	no						no						outpatient follow-up	same	234
691	58	male	yes	general practitioner	ambulance	yellow	internal medicine	specialist	abdominal pain	no	no	no	no	yes	no	no	yes	no	3	low	no	no	no	no	0	no					no						no						admission ward	same	189
692	54	male	yes	self-refferal	ambulance	orange	ED physician	ED phycisian	collaps	no	no	no	no	no	no	no	no	no	0	low	no	no	yes	no	0	no					no						no						admission ward	same	208
693	69	female	yes	general practitioner	ambulance	yellow	cardiology	specialist	chest pain	no	no	no	no	no	no	no	no	no	0	low	no	no	no	no	0	no					no						no						outpatient follow-up	same	179
694	73	female	yes	specialist	ambulatory	yellow	internal medicine	specialist	abdominal pain	no	no	no	no	yes	no	no	yes	no	4	high	no	no	no	no	0	no					no						no						admission ward	same	175
695	63	male	yes	specialist	ambulatory	yellow	other	specialist	malaise	no	no	no	no	no	no	no	no	no	0	low	no	no	no	no	0	no					no						no						outpatient follow-up	same	134
696	64	male	yes	self-refferal	ambulance	green	ED physician	ED phycisian	other	no	no	no	no	no	no	no	yes	no	2	low	no	no	no	yes	1	yes	neurology	pre-existing agreement	first seizure	yes	no						no						outpatient follow-up	same	165
697	9	male	no	self-refferal	ambulance	yellow	ED physician	ED phycisian	traumatic injury	no	no	yes	no	no	no	no	no	no	1	low	no	no	no	yes	1	yes	other	pre-existing agreement	CT-cerebrum	yes	no						no						home	same	216
698	43	male	yes	specialist	ambulatory	yellow	other	specialist	dyspnea	no	no	no	no	no	no	no	no	no	0	low	no	no	no	no	0	no					no						no						outpatient follow-up	same	169
699	75	male	yes	specialist	ambulatory	yellow	internal medicine	specialist	malaise	no	no	no	no	no	no	no	yes	no	6	high	yes	yes	no	no	0	no					no						no						outpatient follow-up	same	142
700	43	female	yes	self-refferal	ambulatory	orange	ED physician	ED phycisian	chest pain	no	no	no	no	no	no	no	no	no	0	low	no	no	no	no	0	no					no						no						home	same	88
701	70	male	yes	specialist	ambulatory	yellow	internal medicine	specialist	malaise	no	no	no	no	no	no	no	no	no	1	low	no	no	no	no	0	no					no						no						admission ward	same	239
702	41	female	yes	specialist	ambulatory	yellow	ED physician	ED phycisian	other	no	no	no	no	no	no	no	no	no	0	low	no	no	no	no	0	no					no						no						outpatient follow-up	same	90
703	82	female	yes	self-refferal	ambulance	yellow	ED physician	ED phycisian	malaise	no	yes	yes	yes	no	no	no	no	no	3	low	no	no	no	no	0	no					no						no						home	same	302
704	67	female	yes	specialist	ambulatory	yellow	internal medicine	specialist	malaise	no	no	no	no	no	no	no	yes	no	3	low	no	no	no	no	0	no					no						no						home	same	148
705	15	male	no	self-refferal	ambulatory	blue	ED physician	ED phycisian	traumatic injury	no	no	no	no	no	no	no	no	no	0	low	no	no	no	no	0	no					no						no						home	same	109
706	36	male	yes	self-refferal	ambulatory	blue	ED physician	ED phycisian	malaise	no	no	no	no	no	no	no	no	no	0	low	no	no	no	no	0	no					no						no						home	same	145
707	44	female	yes	general practitioner	ambulatory	green	other	specialist	dyspnea	no	no	no	no	no	no	no	no	no	0	low	no	no	no	no	0	no					no						no						home	same	175
708	56	female	yes	general practitioner	ambulatory	yellow	neurology	specialist	headdache	no	no	no	no	no	no	no	no	no	0	low	no	no	no	no	0	no					no						no						admission ward	same	186
709	61	female	yes	general practitioner	ambulance	yellow	ED physician	ED phycisian	malaise	no	no	yes	no	no	no	no	yes	no	4	high	no	no	no	yes	1	yes	internal medicine	admission department		yes	no						no						admission ward	same	175
710	39	male	yes	self-refferal	ambulatory	red	ED physician	ED phycisian	other	no	no	yes	no	no	no	no	no	no	1	low	no	no	no	yes	1	yes	neurology	other		yes	no						no						home	same	138
711	22	male	yes	self-refferal	ambulance	yellow	ED physician	ED phycisian	chest pain	no	no	yes	no	no	no	no	no	no	1	low	no	no	no	no	0	no					no						no						outpatient follow-up	same	239
712	39	male	yes	specialist	ambulatory	yellow	cardiology	specialist	palpitations	yes	no	no	no	no	no	no	no	no	1	low	no	no	no	yes	1	yes	emergency physician	pre-existing agreement	cardioversion	yes	no						no						outpatient follow-up	same	330
713	57	female	yes	specialist	ambulatory	yellow	internal medicine	specialist	other	no	yes	no	no	no	no	no	yes	no	6	high	no	no	no	no	0	no					no						no						home	same	191
714	50	female	yes	general practitioner	ambulatory	orange	internal medicine	specialist	other	no	yes	no	no	no	no	no	no	no	0	low	no	no	no	no	0	no					no						no						outpatient follow-up	same	232
715	42	female	yes	specialist	ambulatory	green	internal medicine	specialist	other	no	yes	no	no	no	no	no	yes	no	3	low	no	no	no	no	0	no					no						no						admission ward	same
716	9	male	no	specialist	ambulatory	green	ED physician	ED phycisian	traumatic injury	no	no	no	no	no	no	no	no	no	0	low	no	no	no	no	0	no					no						no						outpatient follow-up	same
717	47	male	yes	general practitioner	ambulatory	yellow	internal medicine	specialist	chest pain	no	no	no	no	no	no	no	no	no	0	low	no	no	no	yes	1	yes	cardiology	exclusion diagnosis		yes	no						no						admission ward	same
718	85	male	yes	general practitioner	ambulance	yellow	other	specialist	malaise	no	yes	yes	yes	no	no	no	no	no	3	low	no	no	no	yes	1	yes	internal medicine	exclusion diagnosis		yes	no						no						admission ward	same
719	58	female	yes	general practitioner	ambulatory	green	ED physician	ED phycisian	traumatic injury	no	no	no	no	no	no	no	no	no	0	low	no	no	no	no	0	no					no						no						home	same	93
720	36	male	yes	general practitioner	ambulatory	green	surgery	specialist	traumatic injury	no	no	no	no	no	no	no	no	no	0	low	no	no	no	no	0	no					no						no						outpatient follow-up	same	76
721	29	female	yes	self-refferal	ambulance	yellow	ED physician	ED phycisian	other	no	no	no	no	no	no	no	no	no	0	low	yes	yes	no	no	0	no					no						no						home	same
722	38	female	yes	self-refferal	ambulance	yellow	ED physician	ED phycisian	traumatic injury	no	no	no	no	no	no	no	no	no	0	low	no	no	no	no	0	no					no						no						outpatient follow-up	same	133
723	23	female	yes	self-refferal	ambulatory	orange	ED physician	ED phycisian	malaise	no	no	no	no	no	no	no	no	no	0	low	no	no	no	no	0	no					no						no						admission ward	same	95
724	57	male	yes	general practitioner	ambulatory	orange	internal medicine	specialist	malaise	no	no	no	no	no	no	no	no	no	0	low	no	no	no	no	0	no					no						no						admission ward	same
725	32	male	yes	specialist	ambulatory	green	internal medicine	specialist	malaise	no	yes	no	no	no	no	no	no	no	0	low	no	no	no	no	0	no					no						no						outpatient follow-up	same	111
726	89	female	yes	specialist	ambulatory	yellow	ED physician	ED phycisian	traumatic injury	no	yes	no	no	no	no	no	no	no	0	low	no	no	no	no	0	no					no						no						outpatient follow-up	same	89
727	83	female	yes	self-refferal	ambulance	yellow	ED physician	ED phycisian	other	no	yes	no	no	no	no	no	no	no	0	low	no	no	yes	no	0	no					no						no						outpatient follow-up	same	155
728	23	female	yes	general practitioner	ambulatory	yellow	surgery	specialist	other	no	no	no	no	no	no	no	no	no	0	low	no	no	no	no	0	no					no						no						outpatient follow-up	same	88
729	46	female	yes	specialist	ambulatory	green	ED physician	ED phycisian	traumatic injury	no	no	no	no	no	no	no	no	no	0	low	no	no	no	no	0	no					no						no						outpatient follow-up	same	29
730	57	female	yes	self-refferal	ambulatory	green	ED physician	ED phycisian	other	no	no	no	no	no	no	no	no	no	0	low	no	no	no	no	0	no					no						no						outpatient follow-up	same	58
731	56	male	yes	general practitioner	ambulatory	yellow	other	specialist	other	no	no	no	no	no	no	no	no	no	0	low	no	no	no	no	0	no					no						no						home	same	43
732	51	male	yes	specialist	ambulatory	green	other	specialist	other	no	no	no	no	no	no	no	no	no	0	low	no	no	no	no	0	no					no						no						outpatient follow-up	same	26
733	68	male	yes	general practitioner	ambulatory	green	surgery	specialist	traumatic injury	yes	no	no	no	no	no	no	no	no	2	low	no	no	no	no	0	no					no						no						admission ward	same	134
734	75	male	yes	specialist	ambulatory	yellow	internal medicine	specialist	other	no	no	no	no	no	no	no	yes	no	6	high	no	no	no	no	0	no					no						no						admission ward	same	154
735	73	female	yes	self-refferal	ambulatory	yellow	other	specialist	other	no	no	no	no	no	no	no	no	no	0	low	no	no	no	no	0	no					no						no						outpatient follow-up	same	54
736	37	female	yes	specialist	ambulatory	yellow	internal medicine	specialist	malaise	no	no	no	no	no	no	no	no	no	1	low	no	no	no	no	0	no					no						no						outpatient follow-up	same	172
737	0	male	no	general practitioner	ambulatory	green	other	specialist	other	no	no	no	no	no	no	no	no	no	0	low	no	no	no	no	0	no					no						no						outpatient follow-up	same	108
738	33	male	yes	specialist	ambulatory	green	internal medicine	specialist	malaise	no	no	no	no	no	no	no	no	no	0	low	no	no	no	no	0	no					no						no						home	same
739	0	male	no	general practitioner	ambulatory	yellow	other	specialist	malaise	no	no	no	no	no	no	no	no	no	0	low	yes	yes	no	no	0	no					no						no						home	same	89
740	43	male	yes	general practitioner	ambulatory	orange	ED physician	ED phycisian	abdominal pain	no	no	no	no	no	no	no	no	no	0	low	no	no	no	no	0	no					no						no						outpatient follow-up	same	166
741	59	male	yes	self-refferal	ambulance	orange	ED physician	ED phycisian	malaise	no	yes	no	no	no	no	no	no	no	1	low	no	no	yes	no	0	no					no						no						admission ICU	same	104
742	42	male	yes	specialist	ambulance	yellow	cardiology	specialist	palpitations	yes	no	no	no	no	no	no	no	no	1	low	no	no	no	yes	1	yes	emergency physician	pre-existing agreement	cardioversion	yes	no						no						home	same	252
743	10	male	no	self-refferal	ambulatory	green	ED physician	ED phycisian	traumatic injury	no	no	no	no	no	no	no	no	no	0	low	no	no	no	no	0	no					no						no						home	same	27
744	56	female	yes	self-refferal	ambulatory	yellow	ED physician	ED phycisian	traumatic injury	no	no	no	no	no	no	no	no	no	0	low	no	no	no	no	0	no					no						no						outpatient follow-up	same	53
745	14	female	no	general practitioner	ambulatory	green	ED physician	ED phycisian	traumatic injury	no	no	no	no	no	no	no	no	no	0	low	no	no	no	no	0	no					no						no						home	same
746	64	female	yes	self-refferal	ambulance	yellow	ED physician	ED phycisian	malaise	yes	no	no	no	no	no	no	no	no	1	low	no	no	no	yes	2	yes	cardiology	specific procedure	read-out of ICD	yes	no	cardiology	internal medicine	other		yes	no						admission ward	same	130
747	71	female	yes	specialist	ambulatory	yellow	ED physician	ED phycisian	traumatic injury	no	no	no	no	no	no	no	no	no	1	low	no	no	no	no	0	no					no						no						outpatient follow-up	same	89
748	0	male	no	general practitioner	ambulatory	yellow	other	specialist	other	no	no	no	no	no	no	no	no	no	0	low	no	no	no	no	0	no					no						no						admission ward	same	159
749	73	male	yes	self-refferal	ambulance	yellow	ED physician	ED phycisian	malaise	no	no	no	no	yes	no	no	no	no	2	low	no	no	no	yes	1	yes	cardiology	admission department		yes	no						no						admission ward	same	343
750	78	female	yes	general practitioner	ambulatory	yellow	surgery	specialist	traumatic injury	no	no	yes	no	no	no	no	no	no	2	low	no	no	no	no	0	no					no						no						admission ward	same	240
751	61	male	yes	self-refferal	ambulatory	orange	ED physician	ED phycisian	dyspnea	no	no	no	no	no	no	no	no	no	0	low	no	no	no	yes	1	yes	cardiology	exclusion diagnosis	ACS	no	no						no						home	same	245
752	58	male	yes	general practitioner	ambulance	red	ED physician	ED phycisian	dyspnea	no	no	no	yes	no	no	no	no	no	1	low	no	no	yes	no	0	no					no						no						admission ward	same
753	56	male	yes	self-refferal	ambulance	orange	ED physician	ED phycisian	chest pain	no	no	no	no	no	no	no	no	no	0	low	no	no	no	no	0	no					no						no						home	same	202
754	80	male	yes	general practitioner	ambulatory	green	other	specialist	other	no	yes	no	no	no	no	no	yes	no	6	high	no	no	no	yes	1	yes	neurology	exclusion diagnosis		yes	no						no						admission ward	same	276
755	73	male	yes	specialist	ambulatory	green	ED physician	ED phycisian	traumatic injury	no	no	no	no	no	no	no	no	no	0	low	no	no	no	no	0	no					no						no						home	same	48
756	66	male	yes	general practitioner	ambulatory	yellow	ED physician	ED phycisian	other	no	yes	no	no	no	no	no	no	no	0	low	no	no	no	no	0	no					no						no						outpatient follow-up	same
757	60	female	yes	self-refferal	ambulance	yellow	ED physician	ED phycisian	abdominal pain	no	no	no	no	no	no	no	no	no	1	low	no	no	no	no	0	no					no						no						home	same	165
758	58	female	yes	general practitioner	ambulatory	green	ED physician	ED phycisian	traumatic injury	no	no	no	no	no	no	no	no	no	0	low	no	no	no	no	0	no					no						no						outpatient follow-up	same
759	48	female	yes	self-refferal	ambulatory	green	ED physician	ED phycisian	traumatic injury	no	no	no	no	no	no	no	no	no	0	low	no	no	no	no	0	no					no						no						outpatient follow-up	same	177
760	52	female	yes	general practitioner	ambulance	yellow	surgery	specialist	malaise	no	yes	no	no	no	no	no	no	no	0	low	no	no	no	no	0	no					no						no						admission ward	same
761	34	male	yes	general practitioner	ambulatory	orange	ED physician	ED phycisian	abdominal pain	no	no	no	no	no	no	no	yes	no	0	low	no	no	no	no	0	no					no						no						home	same	271
762	60	female	yes	specialist	ambulatory	green	internal medicine	specialist	abdominal pain	no	no	no	no	no	no	no	yes	no	2	low	no	no	no	no	0	no					no						no						home	same	215
763	26	male	yes	general practitioner	ambulatory	yellow	other	specialist	other	no	no	no	no	no	no	no	no	no	0	low	no	no	no	no	0	no					no						no						outpatient follow-up	same
764	56	male	yes	specialist	ambulatory	green	ED physician	ED phycisian	traumatic injury	no	no	no	no	no	no	no	no	no	0	low	no	no	no	yes	1	yes	surgery	specific procedure	operation	yes	no						no						outpatient follow-up	same	167
765	6	female	no	self-refferal	ambulatory	yellow	ED physician	ED phycisian	traumatic injury	no	no	no	no	no	no	no	no	no	0	low	no	no	no	yes	2	yes	surgery	specific procedure	operation	yes	no	surgery	other				no						admission ward	same	191
766	53	female	yes	specialist	ambulatory	green	ED physician	ED phycisian	traumatic injury	no	no	no	no	no	no	no	no	no	0	low	no	no	no	no	0	no					no						no						outpatient follow-up	same
767	42	female	yes	specialist	ambulatory	orange	internal medicine	specialist	malaise	no	no	no	no	no	no	no	yes	no	2	low	no	no	no	no	0	no					no						no						home	same	197
768	23	female	yes	specialist	ambulance	orange	internal medicine	specialist	other	no	no	no	no	no	no	no	no	no	0	low	no	no	no	no	0	no					no						no						admission ward	same	67
769	7	male	no	self-refferal	ambulatory	yellow	ED physician	ED phycisian	traumatic injury	no	no	no	no	no	no	no	no	no	0	low	no	no	no	no	0	no					no						no						home	same	76
770	65	male	yes	self-refferal	ambulatory	yellow			other	yes	no	no	no	no	no	no	yes	no	4	high	no	no	no	no	0	no					no						no						admission ward	same	132
771	0	male	no	specialist	ambulatory	yellow	other	specialist	malaise	no	no	no	no	no	no	no	no	no	0	low	no	no	no	no	0	no					no						no						admission ward	same	46
772	19	male	yes	self-refferal	ambulatory	green	ED physician	ED phycisian	traumatic injury	no	no	no	no	no	no	no	no	no	0	low	no	no	no	no	0	no					no						no						home	same	56
773	77	male	yes	specialist	ambulatory	green	ED physician	ED phycisian	traumatic injury	no	no	no	no	no	no	no	yes	no	6	high	no	no	no	yes	1	yes	surgery	admission department		yes	no						no						admission ward	same
774	14	female	no	general practitioner	ambulatory	yellow	ED physician	ED phycisian	other	no	no	no	no	no	no	no	no	no	0	low	no	no	no	no	0	no					no						no						home	same	122
775	59	male	yes	self-refferal	ambulance	orange	cardiology	specialist	chest pain	no	no	yes	no	no	no	no	no	no	1	low	no	no	no	no	0	no					no						no						home	same
776	84	male	yes	general practitioner	ambulance	yellow	neurology	specialist	malaise	no	yes	no	no	no	no	no	yes	no	2	low	no	no	no	no	0	no					no						no						admission ward	same	263
777	54	female	yes	specialist	ambulatory	yellow	internal medicine	specialist	malaise	no	no	no	no	no	no	no	yes	no	6	high	no	no	no	no	0	no					no						no						outpatient follow-up	same	251
778	44	female	yes	self-refferal	ambulance	orange	ED physician	ED phycisian	chest pain	no	no	no	no	no	no	no	no	no	0	low	no	no	no	no	0	no					no						no						home	same
779	70	female	yes	general practitioner	ambulance	orange	cardiology	specialist	chest pain	no	no	no	no	no	no	no	no	no	0	low	no	no	no	no	0	no					no						no						outpatient follow-up	same	215
780	74	female	yes	specialist	ambulatory	yellow	internal medicine	specialist	malaise	no	yes	no	no	yes	no	no	yes	no	8	high	no	no	no	yes	2	yes	other	exclusion diagnosis		yes	no	internal medicine	intensive care	admission IC		yes	no						admission ICU	same	294
781	79	male	yes	general practitioner	ambulance	red	ED physician	ED phycisian	dyspnea	no	no	yes	no	no	no	no	yes	no	4	high	no	no	yes	no	0	no					no						no						admission ICU	same	219
782	50	male	yes	general practitioner	ambulance	yellow	ED physician	ED phycisian	chest pain	no	no	no	no	no	no	no	no	no	0	low	no	no	no	yes	1	yes	other	other		yes	no						no						outpatient follow-up	same	338
783	81	female	yes	self-refferal	ambulance	orange	ED physician	ED phycisian	palpitations	no	no	no	no	no	no	no	yes	no	3	low	no	no	no	yes	1	yes	cardiology	admission department		yes	no						no						admission ward	same	309
784	55	male	yes	specialist	ambulatory	orange	internal medicine	specialist	chest pain	yes	yes	no	no	yes	no	no	no	no	3	low	no	no	no	no	0	no					no						no						admission ward	same
785	44	male	yes	self-refferal	ambulance	yellow	ED physician	ED phycisian	chest pain	no	no	no	no	no	no	no	no	no	0	low	no	no	no	no	0	no					no						no						home	same
786	24	male	yes	self-refferal	ambulatory	green	ED physician	ED phycisian	traumatic injury	no	no	no	no	no	no	no	no	no	0	low	no	no	no	no	0	no					no						no						home	same	54
787	14	female	no	self-refferal	ambulatory	orange	ED physician	ED phycisian	traumatic injury	no	no	no	no	no	no	no	no	no	0	low	no	no	no	yes	1	yes	surgery	other		yes	no						no						outpatient follow-up	same	151
788	71	female	yes	specialist	ambulatory	orange	cardiology	specialist	chest pain	no	yes	no	no	no	no	no	yes	no	2	low	no	no	no	no	0	no					no						no						admission ward	same	266
789	55	male	yes	general practitioner	ambulatory	orange	cardiology	specialist	chest pain	yes	yes	no	no	no	no	no	no	no	1	low	no	no	no	no	0	no					no						no						outpatient follow-up	same	137
790	83	female	yes	self-refferal	ambulance	yellow	ED physician	ED phycisian	other	yes	yes	no	no	no	no	no	no	no	0	low	no	no	no	yes	2	yes	neurology	pre-existing agreement	CT-cerebrum	yes	no	emergency physician	surgery	admission department		yes	no						admission ward	same	213
791	67	male	yes	specialist	ambulatory	yellow	internal medicine	specialist	other	no	no	no	no	yes	no	no	yes	no	2	low	no	no	no	no	0	no					no						no						outpatient follow-up	same
792	65	male	yes	self-refferal	ambulance	orange	ED physician	ED phycisian	traumatic injury	no	no	no	no	no	no	no	no	no	0	low	no	no	no	yes	2	yes	surgery	specific procedure		yes	no	emergency physician	other	specific procedure		yes	no						admission ward	same
793	83	female	yes	self-refferal	ambulance	orange	ED physician	ED phycisian	palpitations	no	no	no	no	no	no	no	no	no	0	low	no	no	no	yes	1	yes	cardiology	exclusion diagnosis	ACS	no	no						no						outpatient follow-up	same	201
794	68	male	yes	self-refferal	ambulance	orange	cardiology	specialist	chest pain	yes	no	no	no	no	no	no	no	no	1	low	no	no	no	no	0	no					no						no						outpatient follow-up	same
795	27	male	yes	self-refferal	ambulatory	green	ED physician	ED phycisian	traumatic injury	no	no	no	no	no	no	no	no	no	0	low	no	no	no	no	0	no					no						no						outpatient follow-up	same	162
796	69	female	yes	general practitioner	ambulatory	orange	other	specialist	dyspnea	no	yes	yes	no	no	no	no	no	no	1	low	no	no	no	no	0	no					no						no						home	same	283
797	39	female	yes	self-refferal	ambulatory	yellow	surgery	specialist	abdominal pain	no	no	no	no	no	no	no	yes	no	2	low	no	no	no	no	0	no					no						no						admission ward	same	321
798	62	male	yes	general practitioner	ambulance	orange	cardiology	specialist	palpitations	no	no	yes	no	no	no	no	no	no	1	low	no	no	no	yes	1	yes	other	other		no	no						no						home	same	387
799	64	male	yes	general practitioner	ambulance	green	other	specialist	other	no	no	no	no	no	no	no	no	no	0	low	no	no	no	no	0	no					no						no						admission ward	same	190
800	80	female	yes	specialist	ambulatory	green	ED physician	ED phycisian	traumatic injury	no	no	no	yes	no	no	no	no	no	1	low	no	no	no	no	0	no					no						no						outpatient follow-up	same
801	51	male	yes	specialist	ambulatory	green	ED physician	ED phycisian	traumatic injury	no	no	no	no	no	no	no	no	no	0	low	no	no	no	no	0	no					no						no						outpatient follow-up	same	74
802	65	male	yes	general practitioner	ambulatory	yellow	other	specialist	dyspnea	no	no	no	no	no	no	no	yes	no	2	low	no	no	no	no	0	no					no						no						home	same
803	97	female	yes	general practitioner	ambulance	orange	ED physician	ED phycisian	other	no	yes	yes	no	no	no	no	yes	no	4	high	no	no	no	yes	1	yes	internal medicine	admission department		yes	no						no						admission ward	same	327
804	46	female	yes	self-refferal	ambulance	yellow	surgery	specialist	abdominal pain	no	no	no	no	yes	no	no	yes	no	4	high	no	no	no	no	0	no					no						no						admission ward	same	333
805	56	female	yes	specialist	ambulatory	yellow	other	specialist	malaise	no	no	no	no	no	yes	no	no	no	3	low	no	no	no	no	0	no					no						no						admission ward	same
806	40	male	yes	self-refferal	ambulatory	yellow	ED physician	ED phycisian	malaise	no	no	no	no	no	no	no	no	no	0	low	no	no	no	no	0	no					no						no						home	same	93
807	20	male	yes	specialist	ambulatory	green	ED physician	ED phycisian	traumatic injury	no	no	no	no	no	no	no	no	no	0	low	no	no	no	no	0	no					no						no						home	same	50
808	52	female	yes	general practitioner	ambulatory	green	internal medicine	specialist	traumatic injury	no	no	yes	no	no	no	no	no	no	1	low	no	no	no	no	0	no					no						no						admission ward	same	292
809	34	female	yes	general practitioner	ambulatory	yellow	other	specialist	dyspnea	no	no	no	no	no	no	no	yes	no	0	low	no	no	no	no	0	no					no						no						admission ward	next
810	68	female	yes	general practitioner	ambulance	yellow	internal medicine	specialist	other	yes	yes	no	no	no	no	no	yes	no	1	low	no	no	no	yes	1	yes	cardiology	other		yes	no						no						admission ward	same	301
811	85	male	yes	general practitioner	ambulatory	yellow	other	specialist	abdominal pain	yes	yes	no	no	no	no	no	yes	no	3	low	no	no	no	no	0	no					no						no						admission ward	same	206
812	54	female	yes	general practitioner	ambulatory	orange	cardiology	specialist	chest pain	yes	no	yes	no	no	no	no	no	no	2	low	no	no	no	yes	1	yes	other	other		no	no						no						outpatient follow-up	same	256
813	15	female	no	self-refferal	ambulatory	green	ED physician	ED phycisian	traumatic injury	no	no	no	no	no	no	no	no	no	0	low	no	no	no	no	0	no					no						no						home	same
814	24	female	yes	self-refferal	ambulatory	orange	ED physician	ED phycisian	abdominal pain	no	no	no	no	no	no	no	no	no	0	low	no	no	no	yes	2	yes	other	exclusion diagnosis		yes	no	emergency physician	surgery	outpatient follow-up		yes	no						outpatient follow-up	same	154
815	82	male	yes	general practitioner	ambulance	yellow	other	specialist	malaise	yes	no	no	no	no	no	no	no	no	1	low	no	no	no	no	0	no					no						no						home	same
816	23	female	yes	general practitioner	ambulatory	yellow	internal medicine	specialist	dyspnea	no	no	no	no	no	no	no	no	no	0	low	no	no	no	no	0	no					no						no						home	same
817	68	male	yes	general practitioner	ambulatory	yellow	surgery	specialist	abdominal pain	yes	yes	no	no	no	no	no	no	no	0	low	no	no	no	yes	1	missed	cardiology				no						no						admission ward	same	166
818	15	female	no	general practitioner	ambulatory	yellow	ED physician	ED phycisian	headdache	no	no	no	no	no	no	no	no	no	0	low	no	no	no	yes	1	yes	neurology	exclusion diagnosis		no	no						no						home	same	168
819	65	female	yes	self-refferal	ambulance	orange	ED physician	ED phycisian	collaps	yes	no	no	no	no	no	no	no	no	1	low	no	no	no	yes	1	yes	neurology	exclusion diagnosis		yes	no						no						outpatient follow-up	same
820	0	female	no	specialist	ambulatory	orange	other	specialist	malaise	no	no	no	no	no	no	no	no	no	0	low	no	no	no	no	0	no					no						no						admission ward	same	32
821	31	female	yes	specialist	ambulance	green	neurology	specialist	other	no	no	no	no	no	no	no	no	no	1	low	no	no	no	no	0	no					no						no						outpatient follow-up	same	170
822	31	female	yes	self-refferal	ambulance	orange	ED physician	ED phycisian	traumatic injury	no	no	no	no	no	no	no	no	no	0	low	no	no	yes	no	0	no					no						no						outpatient follow-up	same
823	23	female	yes	general practitioner	ambulatory	yellow	internal medicine	specialist	dyspnea	no	no	no	no	no	no	no	no	no	0	low	no	no	no	no	0	no					no						no						home	same
824	73	female	yes	general practitioner	ambulatory	green	internal medicine	specialist	traumatic injury	no	no	no	no	no	no	no	no	no	0	low	no	no	no	no	0	no					no						no						outpatient follow-up	same	182
825	0	female	no	general practitioner	ambulatory	orange	other	specialist	other	no	no	no	no	no	no	no	no	no	0	low	no	no	no	no	0	no					no						no						admission ward	same	18
826	38	female	yes	general practitioner	ambulance	yellow	ED physician	ED phycisian	abdominal pain	no	no	no	no	no	no	no	no	no	0	low	no	no	no	no	0	no					no						no						home	same
827	65	male	yes	specialist	ambulatory	green	internal medicine	specialist	malaise	yes	yes	no	no	yes	no	no	no	no	3	low	no	no	no	no	0	no					no						no						outpatient follow-up	same
828	22	male	yes	self-refferal	ambulance	yellow	ED physician	ED phycisian	other	no	no	no	no	no	no	no	no	no	0	low	no	no	no	yes	1	missed	other				no						no						outpatient follow-up	next
829	75	female	yes	self-refferal	ambulance	orange	ED physician	ED phycisian	traumatic injury	no	no	no	no	no	no	no	no	no	0	low	no	no	yes	no	0	no					no						no						home	same	197
830	16	female	no	self-refferal	ambulatory	yellow	ED physician	ED phycisian	traumatic injury	no	no	no	no	no	no	no	no	no	0	low	no	no	no	no	0	no					no						no						outpatient follow-up	same
831	42	male	yes	self-refferal	ambulance	orange	internal medicine	specialist	malaise	no	no	no	no	no	no	no	yes	no	8	high	no	no	no	no	0	no					no						no						admission ward	same	61
832	47	male	yes	specialist	ambulance	yellow	cardiology	specialist	palpitations	yes	no	no	no	no	no	no	no	no	2	low	no	no	no	yes	1	yes	emergency physician	pre-existing agreement	cardioversion	yes	no						no						outpatient follow-up	same	183
833	86	female	yes	self-refferal	ambulance	yellow	ED physician	ED phycisian	other	no	yes	no	no	no	no	no	yes	no	2	low	no	no	no	yes	1	yes	neurology	pre-existing agreement		yes	no						no						home	same	182
834	65	male	yes	general practitioner	ambulatory	green	cardiology	specialist	palpitations	no	no	no	no	no	no	no	no	no	0	low	no	no	no	no	0	no					no						no						outpatient follow-up	same	75
835	77	male	yes	specialist	ambulatory	yellow	internal medicine	specialist	malaise	yes	no	no	no	yes	no	no	yes	no	3	low	no	no	no	no	0	no					no						no						home	same	222
836	62	female	yes	general practitioner	ambulance	orange	neurology	specialist	malaise	no	no	no	no	no	no	no	no	no	0	low	no	no	no	no	0	no					no						no						admission ward	same	109
837	73	male	yes	general practitioner	ambulance	orange	ED physician	ED phycisian	malaise	yes	no	no	yes	no	no	no	no	no	0	low	no	no	yes	no	0	no					no						no						home	same	229
838	68	female	yes	specialist	ambulatory	yellow	cardiology	specialist	palpitations	no	no	no	no	no	no	no	no	no	0	low	no	no	no	yes	1	yes	emergency physician	pre-existing agreement	cardioversion	yes	no						no						outpatient follow-up	same	142
839	62	male	yes	self-refferal	ambulatory	orange	ED physician	ED phycisian	traumatic injury	no	yes	no	no	no	no	no	no	no	0	low	no	no	no	no	0	no					no						no						outpatient follow-up	same	78
840	90	female	yes	general practitioner	ambulance	yellow	surgery	specialist	malaise	yes	no	no	no	no	no	no	no	no	2	low	no	no	no	no	0	no					no						no						admission ward	same	171
841	51	male	yes	self-refferal	ambulatory	green	ED physician	ED phycisian	traumatic injury	no	no	no	yes	no	no	no	no	no	0	low	no	no	no	no	0	no					no						no						home	same	91
842	44	male	yes	specialist	ambulatory	yellow	ED physician	ED phycisian	traumatic injury	no	no	no	no	no	no	no	no	no	0	low	no	no	no	no	0	no					no						no						outpatient follow-up	same	150
843	68	male	yes	general practitioner	ambulance	yellow	internal medicine	specialist	malaise	yes	yes	no	no	no	no	no	yes	no	4	high	no	no	no	no	0	no					no						no						admission ward	same	215
844	19	female	yes	specialist	ambulatory	green	ED physician	ED phycisian	traumatic injury	no	no	no	no	no	no	no	no	no	0	low	no	no	no	no	0	no					no						no						outpatient follow-up	same	75
845	71	female	yes	general practitioner	ambulatory	orange	internal medicine	specialist	malaise	yes	yes	no	no	no	no	no	yes	yes	5	high	no	no	no	no	0	no					no						no						admission ward	same	128
846	23	female	yes	self-refferal	ambulance	yellow	ED physician	ED phycisian	collaps	no	no	no	no	no	no	no	no	no	0	low	no	no	no	yes	3	yes	neurology	pre-existing agreement	first seizure	yes	no	neurology	intensive care	admission IC		no	yes	neurology	other	specific procedure		yes	admission ICU	same
847	66	female	yes	specialist	ambulance	orange	cardiology	specialist	chest pain	yes	no	no	no	no	no	no	no	no	1	low	no	no	no	yes	1	yes	intensive care	admission IC		yes	no						no						admission ICU	same	105
848	70	female	yes	specialist	ambulatory	yellow	other	specialist	abdominal pain	yes	no	no	yes	no	no	no	no	no	1	low	no	no	no	no	0	no					no						no						admission ward	same	133
849	92	male	yes	self-refferal	ambulatory	yellow	other	specialist	other	yes	no	yes	no	no	no	no	no	no	2	low	no	no	no	no	0	no					no						no						admission ward	same	89
850	39	male	yes	self-refferal	ambulatory	orange	ED physician	ED phycisian	chest pain	no	no	no	no	no	no	no	no	no	0	low	no	no	no	no	0	no					no						no						home	same	118
851	39	male	yes	specialist	ambulatory	green	surgery	specialist	other	no	no	no	no	no	no	no	no	yes	1	low	no	no	no	no	0	no					no						no						admission ward	same	133
852	73	female	yes	self-refferal	ambulance	red	ED physician	ED phycisian	traumatic injury	no	no	no	yes	no	no	no	no	no	0	low	no	no	yes	no	0	no					no						no						admission ICU	same	216
853	71	female	yes	general practitioner	ambulatory	green	neurology	specialist	malaise	no	yes	no	no	no	no	no	no	no	1	low	no	yes	no	yes	1	yes	other	exclusion diagnosis		no	no						no						outpatient follow-up	same
854	24	male	yes	general practitioner	ambulatory	yellow	internal medicine	specialist	malaise	no	no	no	no	no	no	no	no	no	0	low	no	no	no	no	0	no					no						no						outpatient follow-up	same	236
855	58	male	yes	general practitioner	ambulance	orange	cardiology	specialist	chest pain	no	no	no	no	no	no	no	no	no	0	low	no	no	no	no	0	no					no						no						admission ward	same	61
856	2	male	no	self-refferal	ambulance	yellow	ED physician	ED phycisian	other	no	no	no	no	no	no	no	no	no	0	low	no	no	no	yes	1	yes	other	admission department		yes	no						no						home	same	139
857	78	female	yes	general practitioner	ambulatory	yellow	internal medicine	specialist	malaise	yes	no	no	no	no	no	no	no	no	1	low	no	no	no	no	0	no					no						no						admission ward	same
858	57	male	yes	self-refferal	ambulatory	yellow	ED physician	ED phycisian	other	no	no	yes	no	no	no	no	yes	no	7	high	no	no	no	yes	1	yes	other	specific procedure		yes	no						no						outpatient follow-up	same	107
859	15	male	no	general practitioner	ambulatory	yellow	other	specialist	malaise	no	no	yes	no	no	no	no	no	no	1	low	no	no	no	no	0	no					no						no						admission ward	same	226
860	14	female	no	general practitioner	ambulatory	yellow	other	specialist	malaise	no	no	no	no	no	no	no	no	no	0	low	no	no	no	no	0	no					no						no						outpatient follow-up	same	127
861	81	female	yes	general practitioner	ambulatory	orange	ED physician	ED phycisian	traumatic injury	no	no	no	no	no	no	no	no	no	0	low	no	no	no	no	0	no					no						no						outpatient follow-up	same	120
862	46	female	yes	general practitioner	ambulatory	yellow	ED physician	ED phycisian	traumatic injury	no	no	no	no	no	no	no	no	no	0	low	no	no	no	no	0	no					no						no						outpatient follow-up	same	112
863	89	male	yes	general practitioner	ambulatory	orange	neurology	specialist	traumatic injury	no	no	no	no	no	no	no	no	no	0	low	no	no	no	no	0	no					no						no						admission ward	same	13
864	51	male	yes	general practitioner	ambulatory	yellow	ED physician	ED phycisian	abdominal pain	no	no	no	no	no	no	no	no	no	0	low	no	no	no	yes	1	missed	surgery				no						no						admission ward	next
865	78	male	yes	self-refferal	ambulance	yellow	ED physician	ED phycisian	malaise	yes	no	no	no	no	no	no	no	no	1	low	no	no	no	yes	1	missed	surgery				no						no						admission ward	next
866	84	male	yes	self-refferal	ambulance	orange	ED physician	ED phycisian	collaps	no	yes	yes	yes	no	no	no	no	no	1	low	no	no	no	yes	1	missed	neurology				no						no						outpatient follow-up	same
867	59	male	yes	self-refferal	ambulatory	orange	internal medicine	specialist	abdominal pain	yes	no	no	no	no	no	no	no	no	2	low	no	no	no	no	0	no					no						no						admission ward	next
868	7	female	no	specialist	ambulatory	green	other	specialist	dyspnea	no	no	no	no	no	no	no	no	no	0	low	no	no	no	no	0	no					no						no						home	same	65
869	89	male	yes	self-refferal	ambulance	orange	ED physician	ED phycisian	traumatic injury	no	yes	no	no	no	no	no	no	yes	1	low	no	no	yes	no	0	no					no						no						admission ward	next
870	70	male	yes	general practitioner	ambulance	yellow	ED physician	ED phycisian	abdominal pain	yes	no	no	no	no	no	no	no	no	3	low	no	no	yes	no	0	no					no						no						admission ward	next
871	77	female	yes	self-refferal	ambulatory	green	ED physician	ED phycisian	traumatic injury	no	yes	no	no	no	no	no	no	no	0	low	no	no	no	yes	1	yes	other	specific procedure	operation	yes	no						no						outpatient follow-up	same	153
872	80	male	yes	general practitioner	ambulance	yellow	cardiology	specialist	chest pain	no	yes	no	no	yes	no	no	no	no	3	low	no	no	no	no	0	no					no						no						admission ward	same	318
873	47	male	yes	specialist	ambulatory	green	ED physician	ED phycisian	traumatic injury	no	no	no	no	no	no	no	no	no	0	low	no	no	no	no	0	no					no						no						outpatient follow-up	same	73
874	50	male	yes	self-refferal	ambulatory	orange	ED physician	ED phycisian	chest pain	no	no	no	no	no	no	yes	no	no	1	low	no	no	no	no	0	no					no						no						home	same	105
875	46	male	yes	general practitioner	ambulance	yellow	ED physician	ED phycisian	other	no	no	no	no	no	no	no	no	no	0	low	no	no	no	no	0	no					no						no						home	same	86
876	71	female	yes	self-refferal	ambulance	yellow	ED physician	ED phycisian	traumatic injury	no	no	no	no	no	no	no	no	no	0	low	no	no	no	yes	1	yes	other	specific procedure		yes	no						no						admission ward	same	212
877	80	female	yes	self-refferal	ambulance	yellow	ED physician	ED phycisian	traumatic injury	yes	yes	no	no	no	no	no	no	no	0	low	no	no	no	yes	2	yes	other	specific procedure		yes	no	emergency physician	neurology	pre-existing agreement	CT-cerebrum	yes	no						admission ward	same	236
878	26	male	yes	specialist	ambulatory	yellow	other	specialist	abdominal pain	no	no	no	no	no	no	no	no	no	0	low	no	no	no	no	0	no					no						no						outpatient follow-up	same	149
879	45	female	yes	self-refferal	ambulatory	green	ED physician	ED phycisian	traumatic injury	no	no	no	no	no	no	no	no	no	0	low	no	no	no	no	0	no					no						no						home	same	42
880	65	female	yes	specialist	ambulatory	yellow	other	specialist	dyspnea	no	no	no	no	no	no	no	yes	no	2	low	no	no	no	no	0	no					no						no						admission ward	same	199
881	74	female	yes	general practitioner	ambulance	orange	cardiology	specialist	chest pain	yes	yes	no	no	no	no	no	no	no	2	low	no	no	no	no	0	no					no						no						admission ward	same	243
882	42	female	yes	general practitioner	ambulatory	yellow	internal medicine	specialist	dyspnea	no	no	no	no	no	no	no	yes	no	8	high	no	no	no	no	0	no					no						no						outpatient follow-up	same	181
883	24	male	yes	general practitioner	ambulatory	green	surgery	specialist	other	no	no	no	no	no	no	no	no	no	0	low	no	no	no	no	0	no					no						no						outpatient follow-up	same
884	89	female	yes	general practitioner	ambulatory	yellow	ED physician	ED phycisian	abdominal pain	yes	yes	no	no	no	no	no	yes	no	7	high	no	no	no	yes	1	yes	surgery	admission department		yes	no						no						admission ward	same	218
885	74	male	yes	general practitioner	ambulatory	green	surgery	specialist	traumatic injury	no	no	no	yes	no	yes	yes	yes	no	6	high	no	no	no	no	0	no					no						no						admission ward	same	107
886	82	male	yes	self-refferal	ambulance	red	ED physician	ED phycisian	malaise	no	yes	no	yes	no	no	no	yes	no	3	low	no	no	yes	no	0	no					no						no						admission ICU	same	16
887	30	male	yes	general practitioner	ambulatory	yellow	surgery	specialist	abdominal pain	no	no	no	no	no	no	no	no	no	0	low	no	no	no	yes	1	yes	internal medicine	exclusion diagnosis		yes	no						no						home	same	458
888	75	female	yes	specialist	ambulatory	yellow	internal medicine	specialist	abdominal pain	no	yes	no	no	no	no	no	yes	no	3	low	no	no	no	no	0	no					no						no						home	same
889	46	female	yes	general practitioner	ambulatory	green	internal medicine	specialist	traumatic injury	no	no	no	no	no	no	no	no	no	0	low	no	no	no	no	0	no					no						no						home	same	71
890	82	male	yes	general practitioner	ambulatory	yellow	ED physician	ED phycisian	traumatic injury	no	no	yes	yes	no	no	no	yes	no	4	high	no	no	no	no	0	no					no						no						home	same	88
891	75	female	yes	self-refferal	ambulance	orange	ED physician	ED phycisian	malaise	no	no	no	no	no	no	no	yes	no	2	low	no	no	yes	no	0	no					no						no						admission ward	same
892	72	male	yes	general practitioner	ambulatory	yellow	neurology	specialist	malaise	yes	yes	no	yes	no	no	yes	yes	no	3	low	no	no	no	no	0	no					no						no						outpatient follow-up	same	164
893	75	male	yes	general practitioner	ambulance	yellow	ED physician	ED phycisian	dyspnea	yes	yes	yes	no	no	no	no	no	no	4	high	no	no	no	yes	1	yes	other	admission department		no	no						no						outpatient follow-up	same
894	36	female	yes	general practitioner	ambulatory	yellow	other	specialist	dyspnea	no	no	no	no	no	no	no	no	no	0	low	no	no	no	no	0	no					no						no						admission ward	same	228
895	67	male	yes	general practitioner	ambulance	yellow	internal medicine	specialist	malaise	yes	yes	no	no	no	no	no	no	no	4	high	no	no	no	yes	1	yes	neurology	exclusion diagnosis		no	no						no						admission ward	same	204
896	60	male	yes	general practitioner	ambulatory	green	surgery	specialist	traumatic injury	no	yes	no	no	no	no	no	yes	no	7	high	no	no	no	no	0	no					no						no						outpatient follow-up	same
897	50	female	yes	specialist	ambulatory	yellow	internal medicine	specialist	dyspnea	no	no	no	no	no	no	no	yes	no	6	high	no	no	no	no	0	no					no						no						outpatient follow-up	same	284
898	24	female	yes	self-refferal	ambulance	yellow	ED physician	ED phycisian	other	no	no	no	yes	no	no	no	no	no	0	low	no	no	no	yes	1	yes	neurology	admission department		no	no						no						outpatient follow-up	same
899	24	male	yes	general practitioner	ambulatory	yellow	ED physician	ED phycisian	chest pain	no	no	no	no	no	no	no	no	no	0	low	no	no	no	no	0	no					no						no						home	same	158
900	28	female	yes	general practitioner	ambulance	yellow	internal medicine	specialist	dyspnea	no	no	no	no	no	no	no	no	no	0	low	no	no	no	yes	1	yes	other	admission department		yes	no						no						admission ICU	same	312
901	69	male	yes	general practitioner	ambulance	orange	internal medicine	specialist	malaise	no	no	no	no	no	no	no	yes	yes	1	low	no	no	no	no	0	no					no						no						admission ward	same	238
902	42	male	yes	specialist	ambulatory	yellow	other	specialist	abdominal pain	no	no	yes	no	no	no	no	no	no	1	low	no	no	no	no	0	no					no						no						admission ward	same	187
903	81	female	yes	self-refferal	ambulance	orange	ED physician	ED phycisian	abdominal pain	no	yes	no	no	no	no	no	no	no	1	low	no	no	yes	no	0	no					no						no						admission ward	same	317
904	83	male	yes	specialist	ambulance	orange	ED physician	ED phycisian	abdominal pain	yes	yes	no	no	yes	no	no	yes	no	6	high	no	no	yes	no	0	no					no						no						admission ward	same	29
905	42	female	yes	general practitioner	ambulance	orange	cardiology	specialist	chest pain	yes	yes	yes	no	no	no	no	no	no	1	low	no	yes	no	no	0	no					no						no						admission ward	next
906	0	female	no	general practitioner	ambulatory	yellow	other	specialist	other	no	no	no	no	no	no	no	no	no	0	low	no	no	no	no	0	no					no						no						admission ward	same	191
907	78	male	yes	specialist	ambulatory	green	cardiology	specialist	other	yes	yes	no	no	yes	no	no	no	no	3	low	no	no	no	yes	1	yes	internal medicine	other		yes	no						no						outpatient follow-up	same	167
908	82	female	yes	specialist	ambulatory	green	ED physician	ED phycisian	traumatic injury	yes	no	no	no	no	no	no	no	no	0	low	no	no	no	no	0	no					no						no						outpatient follow-up	same	170
909	45	male	yes	self-refferal	ambulatory	orange	ED physician	ED phycisian	chest pain	no	yes	no	no	no	no	no	no	no	0	low	no	no	no	yes	1	yes	cardiology	other		yes	no						no						admission ward	next
910	84	female	yes	general practitioner	ambulatory	yellow	neurology	specialist	traumatic injury	yes	yes	no	no	no	no	no	no	no	3	low	no	no	no	no	0	no					no						no						admission ward	same
911	9	female	no	self-refferal	ambulatory	green	ED physician	ED phycisian	traumatic injury	no	no	no	no	no	no	no	no	no	0	low	no	no	no	no	0	no					no						no						home	same	38
912	18	female	yes	specialist	ambulatory	green	ED physician	ED phycisian	traumatic injury	no	no	no	no	no	no	no	no	no	0	low	no	no	no	no	0	no					no						no						outpatient follow-up	same	37
913	31	female	yes	self-refferal	ambulatory	yellow	ED physician	ED phycisian	traumatic injury	no	no	no	no	no	no	no	no	no	0	low	no	no	no	no	0	no					no						no						outpatient follow-up	same	65
914	4	male	no	specialist	ambulance	yellow	other	specialist	dyspnea	no	no	no	no	no	no	no	no	no	0	low	no	no	no	no	0	no					no						no						outpatient follow-up	same	114
915	31	female	yes	self-refferal	ambulance	green	ED physician	ED phycisian	traumatic injury	no	no	no	no	no	no	no	no	no	0	low	no	no	no	yes	1	yes	other	specific procedure	read-out of ICD	yes	no						no						outpatient follow-up	next
916	26	female	yes	self-refferal	ambulatory	yellow	ED physician	ED phycisian	other	no	no	no	no	no	no	no	no	no	0	low	no	no	no	no	0	no					no						no						home	same
917	6	female	no	general practitioner	ambulatory	yellow	ED physician	ED phycisian	abdominal pain	no	no	no	no	no	no	no	no	no	0	low	no	no	no	no	0	no					no						no						home	same
918	68	male	yes	specialist	ambulatory	yellow	internal medicine	specialist	abdominal pain	no	yes	no	no	yes	no	no	yes	no	2	low	no	no	no	yes	1	yes	surgery	exclusion diagnosis		no	no						no						admission ward	same	315
919	8	male	no	specialist	ambulatory	green	ED physician	ED phycisian	traumatic injury	no	no	no	no	no	no	no	no	no	0	low	no	no	no	no	0	no					no						no						outpatient follow-up	same	32
920	79	male	yes	self-refferal	ambulance	orange	ED physician	ED phycisian	malaise	no	no	no	no	no	no	no	no	no	0	low	no	no	yes	no	0	no					no						no						admission ward	same	29
921	70	female	yes	self-refferal	ambulatory	green	other	specialist	malaise	no	no	no	no	no	no	no	yes	no	2	low	no	no	no	no	0	no					no						no						home	same	193
922	61	male	yes	specialist	ambulatory	yellow	cardiology	specialist	palpitations	no	no	no	no	no	no	no	no	no	0	low	no	no	no	yes	1	yes	emergency physician	pre-existing agreement	cardioversion	yes	no						no						outpatient follow-up	same	197
923	89	female	yes	self-refferal	ambulance	orange	ED physician	ED phycisian	other	no	no	no	yes	no	no	no	no	no	1	low	no	no	no	yes	1	yes	surgery	admission department		yes	no						no						admission ward	same	210
924	4	male	no	specialist	ambulatory	green	ED physician	ED phycisian	traumatic injury	no	no	no	no	no	no	no	no	no	0	low	no	no	no	no	0	no					no						no						outpatient follow-up	same	44
925	30	female	yes	general practitioner	ambulatory	orange	ED physician	ED phycisian	other	no	no	no	no	no	no	no	no	no	0	low	no	no	no	no	0	no					no						no						home	same	151
926	74	male	yes	general practitioner	ambulatory	yellow	internal medicine	specialist	dyspnea	yes	no	no	no	no	no	no	no	no	2	low	no	no	no	no	0	no					no						no						admission ward	same	259
927	65	female	yes	specialist	ambulatory	yellow	internal medicine	specialist	other	no	no	yes	no	no	no	no	yes	no	3	low	no	no	no	no	0	no					no						no						admission ward	same	151
928	85	female	yes	self-refferal	ambulance	yellow	ED physician	ED phycisian	other	no	no	no	no	no	no	no	no	no	1	low	no	no	no	no	0	no					no						no						home	same	97
929	46	male	yes	general practitioner	ambulatory	orange	surgery	specialist	malaise	no	no	no	no	no	no	no	no	no	0	low	no	no	no	no	0	no					no						no						outpatient follow-up	same	174
930	19	male	yes	specialist	ambulatory	green	ED physician	ED phycisian	traumatic injury	no	no	no	no	no	no	no	no	no	0	low	no	no	no	no	0	no					no						no						outpatient follow-up	same	47
931	23	female	yes	general practitioner	ambulatory	green	other	specialist	other	no	no	no	no	no	no	no	no	no	0	low	no	no	no	no	0	no					no						no						outpatient follow-up	same	42
932	54	female	yes	specialist	ambulatory	green	other	specialist	other	no	yes	no	no	no	no	yes	no	no	0	low	no	no	no	no	0	no					no						no						outpatient follow-up	same	229
933	38	female	yes	self-refferal	ambulatory	orange	ED physician	ED phycisian	abdominal pain	no	no	no	no	no	no	no	no	no	0	low	no	no	no	no	0	no					no						no						home	same	103
934	53	female	yes	general practitioner	ambulatory	green	surgery	specialist	traumatic injury	no	no	no	no	no	no	no	yes	no	2	low	no	no	no	no	0	no					no						no						home	same	122
935	55	male	yes	general practitioner	ambulatory	green	surgery	specialist	other	no	no	no	no	no	no	no	no	no	0	low	no	no	no	no	0	no					no						no						admission ward	same	193
936	15	male	no	self-refferal	ambulatory	green	ED physician	ED phycisian	traumatic injury	no	no	no	no	no	no	no	no	no	0	low	no	no	no	no	0	no					no						no						outpatient follow-up	same	92
937	6	female	no	general practitioner	ambulatory	yellow	other	specialist	dyspnea	yes	no	no	no	no	no	no	no	no	0	low	no	no	no	no	0	no					no						no						outpatient follow-up	same	61
938	16	male	no	specialist	ambulatory	green	ED physician	ED phycisian	traumatic injury	no	no	no	no	no	no	no	no	no	0	low	no	no	no	no	0	no					no						no						outpatient follow-up	same	53
939	16	male	no	self-refferal	ambulatory	orange	ED physician	ED phycisian	dyspnea	no	no	no	no	no	no	no	no	no	0	low	no	no	no	yes	1	yes	surgery	admission department		yes	no						no						admission ward	same	142
940	57	male	yes	general practitioner	ambulatory	yellow	cardiology	specialist	dyspnea	yes	no	no	no	no	no	no	yes	no	3	low	no	no	no	no	0	no					no						no						outpatient follow-up	same
941	43	female	yes	specialist	ambulatory	yellow	surgery	specialist	malaise	no	no	no	no	no	no	no	yes	no	2	low	no	no	no	no	0	no					no						no						outpatient follow-up	same	148
942	13	male	no	self-refferal	ambulatory	green	ED physician	ED phycisian	traumatic injury	no	no	no	no	no	no	no	no	no	0	low	no	no	no	no	0	no					no						no						home	same	111
943	22	male	yes	self-refferal	ambulance	orange	ED physician	ED phycisian	traumatic injury	no	no	no	no	no	no	no	no	no	0	low	no	no	no	yes	1	yes	surgery	specific procedure	operation	yes	no						no						outpatient follow-up	same	104
944	65	male	yes	general practitioner	ambulance	orange	cardiology	specialist	chest pain	no	yes	no	no	no	no	no	no	no	0	low	no	no	no	yes	2	yes	internal medicine	admission department		yes	no	cardiology	intensive care	admission IC		yes	no						admission ICU	same	319
945	16	male	no	self-refferal	ambulatory	yellow	ED physician	ED phycisian	other	no	no	no	no	no	no	no	no	no	0	low	no	no	no	no	0	no					no						no						home	same	141
946	20	male	yes	specialist	ambulatory	green	ED physician	ED phycisian	traumatic injury	no	no	no	no	no	no	no	no	no	0	low	no	no	no	no	0	no					no						no						outpatient follow-up	same	29
947	58	female	yes	specialist	ambulatory	yellow	internal medicine	specialist	other	no	no	no	no	no	no	no	yes	no	6	high	no	no	no	no	0	no					no						no						outpatient follow-up	same
948	78	female	yes	specialist	ambulatory	green	other	specialist	other	yes	no	no	no	no	no	no	no	no	1	low	no	no	no	no	0	no					no						no						outpatient follow-up	same	32
949	29	female	yes	general practitioner	ambulatory	yellow	internal medicine	specialist	other	no	no	yes	no	no	no	no	no	no	1	low	no	no	no	no	0	no					no						no						admission ward	same	170
950	11	male	no	self-refferal	ambulatory	green	ED physician	ED phycisian	traumatic injury	no	no	no	no	no	no	no	no	no	0	low	no	no	no	no	0	no					no						no						home	same	50
951	0	male	no	general practitioner	ambulatory	green	surgery	specialist	malaise	no	no	no	no	no	no	no	no	no	0	low	no	no	no	no	0	no					no						no						outpatient follow-up	same	59
952	62	female	yes	self-refferal	ambulatory	yellow	ED physician	ED phycisian	other	no	yes	no	no	no	no	no	no	no	0	low	no	no	no	yes	1	yes	other	specific procedure		yes	no						no						outpatient follow-up	same	213
953	40	female	yes	general practitioner	ambulatory	yellow	ED physician	ED phycisian	abdominal pain	no	no	no	no	no	no	no	no	no	0	low	no	no	no	yes	1	yes	surgery	specific procedure	operation	yes	no						no						admission ward	same	240
954	35	female	yes	general practitioner	ambulatory	yellow	other	specialist	other	no	no	no	no	no	no	no	no	no	0	low	no	no	no	no	0	no					no						no						outpatient follow-up	same	80
955	69	female	yes	specialist	ambulatory	green	ED physician	ED phycisian	traumatic injury	no	no	no	no	no	no	no	no	no	0	low	no	no	no	no	0	no					no						no						outpatient follow-up	same	97
956	58	male	yes	specialist	ambulatory	yellow	internal medicine	specialist	dyspnea	no	no	yes	no	no	no	no	yes	no	7	high	no	no	no	no	0	no					no						no						admission ward	same
957	70	female	yes	general practitioner	ambulance	yellow	surgery	specialist	other	no	yes	yes	no	no	no	no	yes	no	4	high	no	no	no	yes	1	yes	internal medicine	other		yes	no						no						admission ward	same	225
958	17	male	yes	specialist	ambulatory	green	ED physician	ED phycisian	traumatic injury	no	no	no	no	no	no	no	no	no	0	low	no	no	no	no	0	no					no						no						outpatient follow-up	same	123
959	5	male	no	general practitioner	ambulatory	yellow	other	specialist	other	no	no	yes	no	no	no	no	no	no	1	low	no	no	no	no	0	no					no						no						home	same	57
960	1	male	no	general practitioner	ambulatory	orange	other	specialist	dyspnea	no	no	no	no	no	no	no	no	no	0	low	no	no	no	no	0	no					no						no						outpatient follow-up	same	126
961	67	male	yes	general practitioner	ambulance	orange	ED physician	ED phycisian	malaise	no	yes	no	no	yes	yes	no	yes	no	6	high	no	no	no	yes	1	yes	internal medicine	admission department		yes	no						no						admission ward	same
962	83	male	yes	general practitioner	ambulance	yellow	internal medicine	specialist	malaise	no	yes	no	no	no	no	no	yes	no	5	high	no	no	no	no	0	no					no						no						admission ward	same	183
963	1	male	no	self-refferal	ambulatory	green	ED physician	ED phycisian	other	no	no	no	no	no	no	no	no	no	0	low	no	no	no	no	0	no					no						no						home	same	65
964	38	female	yes	general practitioner	ambulance	yellow	ED physician	ED phycisian	other	no	no	no	no	no	no	no	no	no	0	low	no	no	no	no	0	no					no						no						home	same
965	49	female	yes	general practitioner	ambulatory	yellow	internal medicine	specialist	other	no	no	no	no	no	no	no	no	yes	1	low	no	no	no	no	0	no					no						no						home	same
966	87	male	yes	self-refferal	ambulance	orange	ED physician	ED phycisian	dyspnea	yes	yes	no	no	no	no	no	no	no	1	low	no	no	no	yes	1	yes	intensive care	admission IC		yes	no						no						admission ICU	same	53
967	52	male	yes	general practitioner	ambulatory	yellow	ED physician	ED phycisian	abdominal pain	yes	no	no	no	no	no	no	no	no	1	low	no	no	no	no	0	no					no						no						outpatient follow-up	same	184
968	37	female	yes	specialist	ambulatory	green	ED physician	ED phycisian	traumatic injury	no	no	no	no	no	no	no	no	no	0	low	no	no	no	no	0	no					no						no						outpatient follow-up	same	65
969	57	female	yes	general practitioner	ambulatory	green	neurology	specialist	other	no	no	no	no	no	no	no	no	no	0	low	no	no	no	no	0	no					no						no						outpatient follow-up	same	120
970	65	male	yes	self-refferal	ambulance	orange	cardiology	specialist	chest pain	yes	yes	no	no	no	no	no	no	no	3	low	no	no	no	no	0	no					no						no						admission ward	same	18
971	67	female	yes	general practitioner	ambulance	orange	cardiology	specialist	chest pain	yes	yes	no	yes	no	yes	no	yes	no	6	high	no	no	no	no	0	no					no						no						admission ward	same	328
972	70	female	yes	specialist	ambulatory	yellow	internal medicine	specialist	malaise	no	no	no	no	no	no	no	yes	no	6	high	no	no	no	yes	1	missed	other				no						no						admission ward	same	272
973	21	male	yes	specialist	ambulatory	yellow	internal medicine	specialist	malaise	no	no	no	no	no	no	no	yes	no	2	low	no	no	no	no	0	no					no						no						admission ward	same	227
974	62	male	yes	general practitioner	ambulance	yellow	ED physician	ED phycisian	malaise	no	yes	yes	no	no	no	no	yes	no	1	low	no	no	no	no	0	no					no						no						outpatient follow-up	same	145
975	63	male	yes	specialist	ambulatory	orange	other	specialist	dyspnea	yes	no	no	no	no	no	no	no	yes	1	low	no	no	no	no	0	no					no						no						admission ward	same	319
976	63	female	yes	general practitioner	ambulance	orange	cardiology	specialist	chest pain	no	no	no	no	no	no	no	yes	no	2	low	no	no	no	no	0	no					no						no						home	same	269
977	58	male	yes	general practitioner	ambulance	yellow	ED physician	ED phycisian	other	no	no	no	no	no	no	no	no	no	0	low	no	no	no	yes	1	yes	neurology	other		yes	no						no						outpatient follow-up	same	94
978	60	female	yes	general practitioner	ambulance	yellow	internal medicine	specialist	malaise	no	yes	no	no	no	no	no	yes	no	2	low	no	no	no	no	0	no					no						no						admission ward	same	157
979	56	male	yes	general practitioner	ambulatory	yellow	other	specialist	dyspnea	yes	no	yes	no	no	no	no	no	no	2	low	no	no	no	no	0	no					no						no						home	same
980	44	female	yes	general practitioner	ambulatory	orange	cardiology	specialist	chest pain	yes	no	no	no	no	no	no	no	no	1	low	no	no	no	no	0	no					no						no						admission ward	same	160
981	71	female	yes	specialist	ambulatory	green	internal medicine	specialist	other	no	no	yes	no	no	no	yes	yes	yes	1	low	no	no	no	no	0	no					no						no						outpatient follow-up	same	184
982	64	male	yes	general practitioner	ambulatory	green	other	specialist	traumatic injury	no	yes	no	no	no	no	no	no	no	1	low	no	no	no	no	0	no					no						no						outpatient follow-up	same	116
983	65	male	yes	general practitioner	ambulance	yellow	internal medicine	specialist	other	no	yes	yes	no	yes	no	no	yes	no	4	high	no	no	no	yes	2	yes	other	pre-existing agreement		yes	no	internal medicine	intensive care	admission IC		no	no						admission ward	same	173
984	59	male	yes	specialist	ambulatory	yellow	other	specialist	malaise	yes	no	no	no	no	no	no	no	no	0	low	no	no	no	yes	1	yes	cardiology	exclusion diagnosis		yes	no						no						home	same	202
985	27	female	yes	self-refferal	ambulatory	yellow	ED physician	ED phycisian	abdominal pain	no	no	no	no	no	no	no	no	no	0	low	no	no	no	yes	1	yes	other	specific procedure		yes	no						no						outpatient follow-up	same	223
986	75	male	yes	general practitioner	ambulance	orange	cardiology	specialist	chest pain	yes	no	no	no	yes	no	no	no	no	2	low	no	no	no	no	0	no					no						no						home	same	161
987	58	female	yes	general practitioner	ambulatory	yellow	ED physician	ED phycisian	other	no	no	yes	no	no	no	no	yes	no	3	low	no	no	no	yes	1	yes	other	specific procedure		yes	no						no						outpatient follow-up	same	233
988	51	male	yes	general practitioner	ambulatory	orange	cardiology	specialist	chest pain	no	no	no	no	no	no	no	no	no	0	low	no	no	no	no	0	no					no						no						outpatient follow-up	same	272
989	59	male	yes	general practitioner	ambulatory	yellow	internal medicine	specialist	traumatic injury	yes	yes	no	no	no	no	no	no	no	2	low	no	no	no	yes	1	yes	surgery	specific procedure		yes	no						no						admission ward	same	276
990	51	male	yes	self-refferal	ambulance	yellow	ED physician	ED phycisian	collaps	no	no	no	no	no	no	no	no	no	0	low	no	no	no	no	0	no					no						no						home	same	233
991	80	female	yes	general practitioner	ambulance	orange	internal medicine	specialist	dyspnea	yes	yes	no	no	no	no	no	no	no	1	low	no	no	no	yes	1	yes	neurology	exclusion diagnosis		yes	no						no						admission ward	same	372
992	20	male	yes	general practitioner	ambulatory	yellow	ED physician	ED phycisian	abdominal pain	no	no	no	no	no	no	no	no	no	0	low	no	no	no	no	0	no					no						no						outpatient follow-up	same	169
993	66	male	yes	specialist	ambulatory	green	ED physician	ED phycisian	traumatic injury	no	no	no	no	no	no	no	no	no	0	low	no	no	no	no	0	no					no						no						outpatient follow-up	same	71
994	43	male	yes	general practitioner	ambulatory	green	ED physician	ED phycisian	traumatic injury	no	no	no	no	no	no	no	no	no	0	low	no	no	no	no	0	no					no						no						outpatient follow-up	same	300
995	21	female	yes	self-refferal	ambulance	yellow	ED physician	ED phycisian	abdominal pain	no	no	no	no	no	no	no	no	no	0	low	no	no	no	no	0	no					no						no						admission ward	same	112
996	56	female	yes	general practitioner	ambulatory	yellow	ED physician	ED phycisian	other	no	no	yes	no	no	no	no	no	no	1	low	no	no	no	no	0	no					no						no						home	same	149
997	27	female	yes	general practitioner	ambulatory	yellow	ED physician	ED phycisian	other	no	no	no	no	no	no	no	no	no	0	low	no	no	no	yes	1	yes	surgery	exclusion diagnosis		yes	no						no						outpatient follow-up	same	270
998	51	male	yes	general practitioner	ambulatory	orange	ED physician	ED phycisian	abdominal pain	yes	yes	no	no	no	no	no	no	no	4	high	no	no	no	yes	1	yes	surgery	other		yes	no						no						outpatient follow-up	same	186
999	2	male	no	general practitioner	ambulatory	orange	other	specialist	malaise	no	no	no	no	no	no	no	no	no	0	low	no	no	no	no	0	no					no						no						admission ward	same	91
1000	64	male	yes	general practitioner	ambulatory	yellow	internal medicine	specialist	malaise	no	yes	no	no	no	no	no	no	no	0	low	no	no	no	yes	1	yes	neurology	exclusion diagnosis		yes	no						no						admission ward	same	295
1001	1	female	no	general practitioner	ambulatory	yellow	other	specialist	other	no	no	no	no	no	no	no	no	no	0	low	no	no	no	no	0	no					no						no						outpatient follow-up	same
1002	0	male	no	general practitioner	ambulatory	orange	other	specialist	dyspnea	no	no	no	no	no	no	no	no	no	0	low	no	no	no	no	0	no					no						no						outpatient follow-up	same	137
1003	64	male	yes	general practitioner	ambulatory	yellow	ED physician	ED phycisian	dyspnea	no	no	no	no	no	no	no	no	no	0	low	no	no	no	yes	1	yes	other	admission department		yes	no						no						admission ward	same	203
1004	86	female	yes	general practitioner	ambulatory	green	ED physician	ED phycisian	traumatic injury	no	yes	no	yes	no	no	no	no	no	2	low	no	no	no	no	0	no					no						no						outpatient follow-up	same
1005	61	female	yes	general practitioner	ambulatory	yellow	internal medicine	specialist	dyspnea	no	yes	no	no	no	no	no	no	no	0	low	no	no	no	no	0	no					no						no						home	same	156
1006	10	female	no	specialist	ambulatory	green	ED physician	ED phycisian	traumatic injury	no	no	no	no	no	no	no	no	no	0	low	no	no	no	no	0	no					no						no						outpatient follow-up	same	89
1007	53	male	yes	general practitioner	ambulatory	orange	cardiology	specialist	chest pain	yes	no	no	no	no	no	no	no	no	0	low	no	no	no	no	0	no					no						no						admission ward	same	156
1008	10	female	no	general practitioner	ambulatory	green	ED physician	ED phycisian	traumatic injury	no	no	no	no	no	no	no	no	no	0	low	no	no	no	no	0	no					no						no						outpatient follow-up	same	202
1009	16	female	no	general practitioner	ambulatory	yellow	other	specialist	abdominal pain	no	no	no	no	no	no	no	no	no	0	low	no	no	no	no	0	no					no						no						home	same	187
1010	37	female	yes	specialist	ambulance	yellow	other	specialist	headdache	no	yes	no	no	no	no	no	no	no	1	low	no	no	no	no	0	no					no						no						home	next
1011	10	female	no	specialist	ambulatory	green	ED physician	ED phycisian	traumatic injury	no	no	no	no	no	no	no	no	no	0	low	no	no	no	no	0	no					no						no						outpatient follow-up	same	119
1012	41	male	yes	specialist	ambulatory	yellow	other	specialist	traumatic injury	no	no	no	no	no	no	no	no	yes	0	low	no	yes	no	no	0	no					no						no						outpatient follow-up	same	104
1013	36	male	yes	specialist	ambulatory	yellow	other	specialist	other	no	no	no	no	no	no	no	no	no	0	low	no	no	no	no	0	no					no						no						outpatient follow-up	same
1014	13	female	no	specialist	ambulatory	green	ED physician	ED phycisian	traumatic injury	no	no	no	no	no	no	no	no	no	0	low	no	no	no	no	0	no					no						no						outpatient follow-up	same	85
1015	73	female	yes	general practitioner	ambulatory	green	other	specialist	other	no	yes	no	no	no	no	no	no	no	1	low	no	no	no	no	0	no					no						no						outpatient follow-up	same	105
1016	53	male	yes	self-refferal	ambulatory	orange	ED physician	ED phycisian	chest pain	yes	no	no	no	no	no	no	no	no	1	low	no	yes	no	yes	1	yes	cardiology	exclusion diagnosis	ACS	yes	no						no						admission ward	next
1017	41	female	yes	general practitioner	ambulatory	yellow	ED physician	ED phycisian	traumatic injury	no	no	no	no	no	no	no	no	no	0	low	no	no	no	no	0	no					no						no						outpatient follow-up	same
1018	0	female	no	general practitioner	ambulatory	green	ED physician	ED phycisian	traumatic injury	no	no	no	no	no	no	no	no	no	0	low	no	no	no	no	0	no					no						no						home	same
1019	74	female	yes	self-refferal	ambulance	yellow	ED physician	ED phycisian	malaise	no	yes	no	no	no	no	no	no	yes	1	low	no	no	no	no	0	no					no						no						home	same
1020	71	female	yes	general practitioner	ambulance	yellow	internal medicine	specialist	dyspnea	yes	yes	no	no	no	no	no	yes	no	6	high	no	no	no	no	0	no					no						no						admission ward	next
1021	66	male	yes	self-refferal	ambulatory	orange	ED physician	ED phycisian	palpitations	yes	yes	no	no	no	no	no	no	no	0	low	no	no	no	yes	1	yes	cardiology	specific procedure	read-out of ICD	yes	no						no						outpatient follow-up	same	188
1022	12	male	no	specialist	ambulatory	yellow	ED physician	ED phycisian	other	no	no	no	no	no	no	no	no	no	0	low	no	no	no	no	0	no					no						no						home	same	156
1023	67	female	yes	general practitioner	ambulatory	yellow	other	specialist	malaise	no	no	yes	no	no	no	no	no	no	1	low	no	no	no	no	0	no					no						no						outpatient follow-up	same	110
1024	56	male	yes	general practitioner	ambulatory	yellow	ED physician	ED phycisian	malaise	no	no	no	no	no	no	no	no	no	0	low	no	no	no	yes	1	yes	neurology	exclusion diagnosis		yes	no						no						admission ward	same
1025	33	female	yes	general practitioner	ambulatory	yellow	surgery	specialist	abdominal pain	no	no	no	no	no	no	no	no	no	0	low	no	no	no	no	0	no					no						no						outpatient follow-up	same	357
1026	30	male	yes	general practitioner	ambulatory	yellow	ED physician	ED phycisian	other	no	no	no	no	no	no	no	no	no	0	low	no	no	no	no	0	no					no						no						home	same	36
1027	60	male	yes	specialist	ambulatory	yellow	other	specialist	malaise	no	yes	no	no	no	yes	no	yes	no	3	low	no	no	no	no	0	no					no						no						admission ward	same	188
1028	83	male	yes	specialist	ambulance	yellow	other	specialist	malaise	yes	no	no	no	no	no	no	yes	no	2	low	no	no	no	no	0	no					no						no						admission ward	same	203
1029	67	male	yes	general practitioner	ambulance	orange	neurology	specialist	malaise	no	no	no	no	no	no	no	yes	no	6	high	no	no	no	yes	1	yes	internal medicine	other		yes	no						no						outpatient follow-up	same	68
1030	75	male	yes	self-refferal	ambulatory	orange	ED physician	ED phycisian	malaise	no	no	no	no	no	no	no	no	no	0	low	no	no	no	yes	1	yes	cardiology	exclusion diagnosis	ACS	yes	no						no						admission ward	same	34
1031	20	male	yes	specialist	ambulatory	green	ED physician	ED phycisian	abdominal pain	no	no	no	no	no	no	no	no	no	0	low	no	no	no	no	0	no					no						no						home	same	258
1032	20	male	yes	self-refferal	ambulatory	yellow	ED physician	ED phycisian	other	no	no	no	no	no	no	no	no	no	0	low	no	no	no	no	0	no					no						no						home	same	58
1033	41	male	yes	specialist	ambulatory	green	ED physician	ED phycisian	traumatic injury	no	no	yes	no	no	no	no	no	no	1	low	no	no	no	no	0	no					no						no						outpatient follow-up	same	78
1034	27	male	yes	self-refferal	ambulatory	yellow	ED physician	ED phycisian	other	no	no	no	no	no	no	no	no	no	0	low	no	no	no	no	0	no					no						no						home	same	135
1035	74	female	yes	specialist	ambulatory	yellow	neurology	specialist	other	yes	yes	no	yes	no	no	no	no	no	0	low	no	no	no	yes	1	yes	emergency physician	pre-existing agreement	trauma screening	yes	no						no						home	same	166
1036	57	male	yes	specialist	ambulatory	yellow	other	specialist	palpitations	yes	no	no	no	no	no	no	yes	no	3	low	no	no	no	no	0	no					no						no						admission ward	same
1037	55	female	yes	self-refferal	ambulatory	orange	ED physician	ED phycisian	chest pain	no	no	no	no	no	no	no	no	no	0	low	no	no	no	yes	1	yes	cardiology	exclusion diagnosis	ACS	yes	no						no						home	same	143
1038	67	female	yes	specialist	ambulatory	orange	other	specialist	abdominal pain	yes	yes	no	no	no	no	no	yes	no	2	low	no	no	no	no	0	no					no						no						admission ward	same	146
1039	71	female	yes	general practitioner	ambulance	yellow	cardiology	specialist	abdominal pain	yes	yes	yes	no	no	no	no	yes	no	4	high	no	no	no	yes	1	yes	internal medicine	other		yes	no						no						outpatient follow-up	same	225
1040	68	female	yes	general practitioner	ambulance	yellow	other	specialist	dyspnea	yes	yes	yes	no	yes	no	no	no	no	4	high	no	no	no	yes	1	missed	other				no						no						outpatient follow-up	same	275
1041	24	male	yes	specialist	ambulatory	green	ED physician	ED phycisian	traumatic injury	no	no	no	no	no	no	no	no	no	0	low	no	no	no	no	0	no					no						no						home	same	32
1042	70	female	yes	general practitioner	ambulatory	yellow	internal medicine	specialist	chest pain	no	yes	no	no	no	no	no	no	no	0	low	no	no	no	no	0	no					no						no						home	same	136
1043	0	male	no	self-refferal	ambulance	orange	ED physician	ED phycisian	other	no	no	no	no	no	no	no	no	no	0	low	yes	yes	no	no	0	no					no						no						outpatient follow-up	same	86
1044	0	male	no	general practitioner	ambulatory	green	neurology	specialist	other	no	no	no	no	no	no	no	no	no	0	low	no	no	no	yes	1	yes	emergency physician	pre-existing agreement	trauma screening	yes	no						no						admission ward	same	161
1045	82	female	yes	general practitioner	ambulatory	yellow	cardiology	specialist	palpitations	no	yes	no	no	no	no	no	no	no	0	low	no	no	no	no	0	no					no						no						outpatient follow-up	same	120
1046	84	male	yes	general practitioner	ambulatory	green	internal medicine	specialist	traumatic injury	yes	no	no	no	no	no	no	no	no	0	low	no	no	no	no	0	no					no						no						home	same	81
1047	0	male	no	general practitioner	ambulatory	green	other	specialist	other	no	no	no	no	no	no	no	no	no	0	low	no	no	no	no	0	no					no						no						admission ward	same
1048	66	male	yes	general practitioner	ambulatory	green	surgery	specialist	abdominal pain	no	no	no	no	no	no	no	no	no	0	low	no	no	no	no	0	no					no						no						admission ward	same	177
1049	79	female	yes	specialist	ambulance	not triaged	ED physician	ED phycisian	other	no	no	no	no	no	no	no	no	no	0	low	no	no	no	no	0	no					no						no						admission ward	same	-66
1050	6	male	no	self-refferal	ambulance	red	ED physician	ED phycisian	other	no	no	no	yes	no	no	no	no	no	0	low	no	no	yes	no	0	no					no						no						admission ward	same
1051	72	female	yes	general practitioner	ambulatory	yellow	ED physician	ED phycisian	chest pain	no	yes	no	no	no	no	no	no	no	1	low	no	no	no	no	0	no					no						no						home	same	223
1052	0	female	no	specialist	ambulatory	green	other	specialist	malaise	no	no	no	no	no	no	no	no	no	0	low	no	no	no	no	0	no					no						no						admission ward	same	212
1053	6	male	no	general practitioner	ambulance	orange	other	specialist	malaise	no	no	no	no	no	no	no	no	no	0	low	no	no	no	no	0	no					no						no						admission ward	same	214
1054	18	male	yes	specialist	ambulatory	green	ED physician	ED phycisian	traumatic injury	no	no	no	no	no	no	no	no	no	0	low	no	no	no	no	0	no					no						no						outpatient follow-up	same	59
1055	46	male	yes	general practitioner	ambulance	yellow	other	specialist	malaise	no	no	no	yes	no	no	no	no	no	2	low	no	no	no	no	0	no					no						no						admission ward	same	76
1056	41	female	yes	general practitioner	ambulatory	yellow	ED physician	ED phycisian	traumatic injury	no	no	no	no	no	no	no	no	no	0	low	no	no	no	no	0	no					no						no						outpatient follow-up	same	104
1057	22	male	yes	general practitioner	ambulatory	yellow	ED physician	ED phycisian	abdominal pain	no	no	no	no	no	no	no	no	no	0	low	no	no	no	no	0	no					no						no						home	same
1058	44	female	yes	general practitioner	ambulatory	yellow	ED physician	ED phycisian	abdominal pain	no	no	no	no	no	no	no	no	no	0	low	no	no	no	no	0	no					no						no						home	same
1059	17	male	yes	self-refferal	ambulatory	yellow	other	specialist	malaise	no	no	no	no	no	no	no	no	no	0	low	no	no	no	no	0	no					no						no						home	same	41
1060	41	female	yes	specialist	ambulatory	yellow	internal medicine	specialist	malaise	no	no	no	no	no	no	no	yes	no	2	low	no	no	no	no	0	no					no						no						home	same	110
1061	46	male	yes	specialist	ambulatory	yellow	other	specialist	other	no	no	no	no	no	no	no	no	no	0	low	no	no	no	yes	1	missed	other				no						no						admission ward	same	26
1062	22	female	yes	general practitioner	ambulatory	orange	neurology	specialist	malaise	no	no	no	no	no	no	no	no	no	0	low	no	no	no	no	0	no					no						no						home	same
1063	21	female	yes	general practitioner	ambulatory	orange	ED physician	ED phycisian	abdominal pain	no	no	no	no	no	no	no	no	no	0	low	no	no	no	no	0	no					no						no						outpatient follow-up	same
1064	0	male	no	specialist	ambulatory	green	other	specialist	other	no	no	no	no	no	no	no	no	no	0	low	no	no	no	yes	1	missed	neurology				no						no						outpatient follow-up	next
1065	68	male	yes	self-refferal	ambulance	orange	ED physician	ED phycisian	malaise	no	no	no	no	no	no	no	no	no	0	low	no	no	yes	no	0	no					no						no						admission ward	same	10
1066	68	male	yes	self-refferal	ambulance	orange	cardiology	specialist	chest pain	no	no	no	no	no	no	no	no	no	0	low	no	no	no	no	0	no					no						no						admission ward	same	51
1067	23	female	yes	general practitioner	ambulatory	green	ED physician	ED phycisian	traumatic injury	no	no	no	no	no	no	no	no	no	0	low	no	no	no	no	0	no					no						no						home	same	39
1068	87	female	yes	general practitioner	ambulance	yellow	internal medicine	specialist	malaise	yes	no	no	no	no	no	no	no	no	1	low	no	no	no	yes	1	yes	other	other		no	no						no						outpatient follow-up	same	291
1069	50	female	yes	self-refferal	ambulance	orange	ED physician	ED phycisian	traumatic injury	no	no	no	no	no	no	no	no	no	0	low	no	no	yes	no	0	no					no						no						home	same	148
1070	77	male	yes	general practitioner	ambulatory	orange	ED physician	ED phycisian	traumatic injury	yes	yes	yes	no	no	no	no	no	no	2	low	yes	yes	no	yes	1	yes	surgery	specific procedure	operation	no	no						no						outpatient follow-up	same	97
1071	30	male	yes	self-refferal	ambulatory	green	ED physician	ED phycisian	traumatic injury	no	no	no	no	no	no	no	no	no	0	low	no	no	no	no	0	no					no						no						home	same	116
1072	64	male	yes	specialist	ambulatory	green	ED physician	ED phycisian	traumatic injury	no	no	no	no	no	no	yes	no	no	1	low	no	no	no	no	0	no					no						no						outpatient follow-up	same	54
1073	69	female	yes	self-refferal	ambulatory	yellow	ED physician	ED phycisian	collaps	no	yes	no	no	no	yes	no	no	yes	6	high	no	no	no	yes	1	yes	neurology	pre-existing agreement		yes	no						no						home	same	235
1074	65	male	yes	general practitioner	ambulance	orange	cardiology	specialist	chest pain	no	no	no	no	no	no	no	no	no	0	low	no	no	no	no	0	no					no						no						outpatient follow-up	same	137
1075	59	female	yes	specialist	ambulatory	yellow	internal medicine	specialist	malaise	no	yes	no	no	no	no	no	yes	yes	1	low	no	no	no	no	0	no					no						no						home	same	158
1076	12	male	no	self-refferal	ambulatory	green	ED physician	ED phycisian	traumatic injury	no	no	no	no	no	no	no	no	no	0	low	no	no	no	no	0	no					no						no						outpatient follow-up	same	83
1077	74	male	yes	specialist	ambulance	orange	surgery	specialist	other	yes	yes	no	no	no	no	no	no	no	1	low	no	no	no	no	0	no					no						no						outpatient follow-up	same	164
1078	75	male	yes	general practitioner	ambulatory	yellow	internal medicine	specialist	dyspnea	yes	no	no	no	no	no	yes	no	no	1	low	yes	yes	no	no	0	no					no						no						outpatient follow-up	same	149
1079	33	male	yes	self-refferal	ambulatory	green	ED physician	ED phycisian	traumatic injury	no	no	no	no	no	no	no	no	no	0	low	no	no	no	no	0	no					no						no						home	same	40
1080	56	female	yes	general practitioner	ambulatory	yellow	ED physician	ED phycisian	dyspnea	yes	yes	no	no	no	no	yes	yes	yes	1	low	no	no	no	yes	1	yes	internal medicine	admission department		yes	no						no						admission ward	same	264
1081	23	female	yes	self-refferal	ambulatory	green	ED physician	ED phycisian	other	no	no	no	no	no	no	no	no	no	0	low	no	no	no	no	0	no					no						no						home	same	104
1082	29	male	yes	specialist	ambulatory	yellow	cardiology	specialist	malaise	no	no	no	no	no	no	no	no	no	0	low	no	no	no	yes	1	yes	other	exclusion diagnosis		yes	no						no						outpatient follow-up	same	197
1083	67	female	yes	general practitioner	ambulatory	yellow	ED physician	ED phycisian	malaise	yes	yes	yes	no	no	no	no	no	no	5	high	no	no	no	yes	2	yes	cardiology	admission department		yes	no	cardiology	other	other		yes	no						admission ward	same	394
1084	79	female	yes	general practitioner	ambulance	orange	ED physician	ED phycisian	chest pain	no	yes	no	no	no	no	no	no	no	0	low	no	no	yes	no	0	no					no						no						admission ward	same	20
1085	58	male	yes	general practitioner	ambulance	yellow	surgery	specialist	traumatic injury	yes	no	no	no	no	no	no	no	no	1	low	no	no	no	no	0	no					no						no						admission ward	same	162
1086	28	female	yes	self-refferal	ambulance	orange	ED physician	ED phycisian	other	no	no	no	no	no	no	no	no	no	0	low	no	no	no	no	0	no					no						no						outpatient follow-up	same
1087	25	male	yes	self-refferal	ambulance	yellow	ED physician	ED phycisian	traumatic injury	no	no	no	no	no	no	no	no	no	0	low	no	no	no	no	0	no					no						no						outpatient follow-up	same
1088	41	male	yes	specialist	ambulatory	yellow	internal medicine	specialist	traumatic injury	no	no	no	no	no	no	no	no	yes	0	low	no	no	no	no	0	no					no						no						outpatient follow-up	same	87
1089	56	female	yes	general practitioner	ambulatory	yellow	neurology	specialist	malaise	no	no	no	no	no	no	no	no	no	0	low	no	no	no	yes	1	yes	internal medicine	exclusion diagnosis		yes	no						no						home	same	253
1090	46	male	yes	general practitioner	ambulatory	yellow	neurology	specialist	headdache	no	no	no	no	no	no	no	no	no	0	low	no	no	no	no	0	no					no						no						outpatient follow-up	same	334
1091	15	female	no	specialist	ambulatory	green	ED physician	ED phycisian	traumatic injury	no	no	no	no	no	no	no	no	no	0	low	no	no	no	no	0	no					no						no						outpatient follow-up	same	65
1092	61	female	yes	general practitioner	ambulance	orange	neurology	specialist	malaise	no	no	yes	no	no	no	no	yes	no	1	low	no	no	no	no	0	no					no						no						admission ward	same	24
1093	13	male	no	general practitioner	ambulatory	green	surgery	specialist	abdominal pain	no	no	no	no	no	no	no	no	no	0	low	no	no	no	no	0	no					no						no						outpatient follow-up	same
1094	28	female	yes	specialist	ambulance	orange	neurology	specialist	dyspnea	no	no	no	no	no	no	no	no	no	0	low	no	no	no	yes	2	yes	other	other		yes	no	other	intensive care	admission IC		yes	no						admission ICU	same	206
1095	46	male	yes	self-refferal	ambulance	yellow	ED physician	ED phycisian	chest pain	no	yes	no	no	no	no	no	no	no	1	low	no	no	no	yes	1	yes	cardiology	exclusion diagnosis		no	no						no						home	same
1096	75	female	yes	general practitioner	ambulatory	yellow	neurology	specialist	other	yes	yes	yes	no	no	no	no	no	no	1	low	no	no	no	no	0	no					no						no						home	same	235
1097	83	male	yes	specialist	ambulance	yellow	internal medicine	specialist	malaise	no	yes	no	no	no	no	no	yes	no	5	high	no	no	no	no	0	no					no						no						admission ward	same
1098	13	female	no	specialist	ambulatory	yellow	other	specialist	malaise	no	no	no	yes	no	no	no	no	no	0	low	no	no	no	no	0	no					no						no						admission ward	same	143
1099	86	male	yes	general practitioner	ambulance	orange	internal medicine	specialist	malaise	no	yes	no	no	no	no	no	no	no	1	low	no	no	no	yes	1	yes	cardiology	other		yes	no						no						admission ward	same
1100	70	male	yes	specialist	ambulatory	yellow	surgery	specialist	traumatic injury	no	yes	no	no	no	no	no	no	no	1	low	no	no	no	no	0	no					no						no						home	same	254
1101	3	female	no	self-refferal	ambulance	orange	ED physician	ED phycisian	other	no	no	no	no	no	no	no	no	no	0	low	no	no	no	yes	1	yes	other	admission department		no	no						no						outpatient follow-up	same	136
1102	41	male	yes	self-refferal	ambulance	yellow	ED physician	ED phycisian	chest pain	yes	yes	no	no	no	no	no	no	no	3	low	no	no	no	yes	1	yes	cardiology	specific procedure	read-out of ICD	yes	no						no						admission ward	same	136
1103	23	female	yes	specialist	ambulance	yellow	internal medicine	specialist	other	no	no	no	no	no	no	no	no	no	0	low	no	no	no	yes	2	missed	other				no	other	other				no						admission ward	same	132
1104	65	female	yes	specialist	ambulatory	yellow	internal medicine	specialist	malaise	no	yes	no	no	no	no	no	yes	no	3	low	no	no	no	no	0	no					no						no						admission ward	same
1105	8	male	no	self-refferal	ambulance	orange	ED physician	ED phycisian	traumatic injury	no	no	no	no	no	no	no	no	no	0	low	no	no	yes	no	0	no					no						no						admission ICU	same	27
1106	63	female	yes	specialist	ambulatory	green	ED physician	ED phycisian	other	no	yes	no	no	no	no	no	no	no	0	low	no	no	no	no	0	no					no						no						outpatient follow-up	same	48
1107	27	male	yes	self-refferal	ambulance	yellow	ED physician	ED phycisian	collaps	no	no	no	no	no	no	no	no	no	0	low	no	no	no	no	0	no					no						no						home	same	110
1108	82	male	yes	self-refferal	ambulance	orange	ED physician	ED phycisian	other	yes	yes	no	no	no	no	no	no	no	3	low	no	no	no	yes	2	yes	internal medicine	admission department		yes	no	internal medicine	neurology				no						admission ward	next
1109	1	female	no	general practitioner	ambulatory	yellow	other	specialist	malaise	no	no	no	no	no	no	no	no	no	0	low	no	no	no	no	0	no					no						no						home	same	103
1110	71	female	yes	general practitioner	ambulatory	yellow	ED physician	ED phycisian	abdominal pain	no	yes	no	no	no	no	no	no	no	0	low	no	no	no	no	0	no					no						no						home	same
1111	71	female	yes	self-refferal	ambulance	orange	ED physician	ED phycisian	dyspnea	yes	yes	yes	no	no	no	no	no	no	3	low	no	no	no	yes	1	yes	internal medicine	admission department		yes	no						no						admission ward	same
1112	13	male	no	specialist	ambulatory	green	surgery	specialist	abdominal pain	no	no	no	no	no	no	no	no	no	0	low	no	no	no	no	0	no					no						no						home	same	116
1113	7	female	no	self-refferal	ambulatory	yellow	other	specialist	dyspnea	no	no	yes	no	no	no	no	no	no	1	low	no	no	no	no	0	no					no						no						outpatient follow-up	same	90
1114	24	male	yes	self-refferal	ambulance	yellow	ED physician	ED phycisian	other	no	no	no	no	no	no	no	no	no	0	low	no	no	no	no	0	no					no						no						home	same	95
1115	4	male	no	general practitioner	ambulatory	orange	other	specialist	malaise	no	no	no	no	no	no	no	no	no	0	low	no	no	no	no	0	no					no						no						outpatient follow-up	same	94
1116	35	female	yes	self-refferal	ambulatory	green	ED physician	ED phycisian	traumatic injury	no	no	no	no	no	no	no	no	no	0	low	no	no	no	no	0	no					no						no						home	same	26
1117	50	male	yes	specialist	ambulatory	yellow	ED physician	ED phycisian	other	no	no	no	no	no	no	no	no	no	0	low	no	no	no	no	0	no					no						no						home	same	58
1118	49	male	yes	specialist	ambulatory	green	surgery	specialist	abdominal pain	no	yes	no	no	no	no	no	no	no	0	low	no	no	no	no	0	no					no						no						admission ward	same	191
1119	65	female	yes	general practitioner	ambulatory	yellow	surgery	specialist	abdominal pain	no	yes	yes	yes	no	no	no	no	no	2	low	no	no	no	no	0	no					no						no						outpatient follow-up	same	198
1120	41	male	yes	specialist	ambulatory	yellow	internal medicine	specialist	traumatic injury	no	no	no	no	no	yes	no	no	yes	3	low	no	no	no	yes	1	yes	cardiology	exclusion diagnosis		yes	no						no						admission ward	same	148
1121	19	female	yes	self-refferal	ambulatory	yellow	ED physician	ED phycisian	other	no	no	yes	no	no	no	no	no	no	1	low	no	no	no	no	0	no					no						no						home	same	124
1122	0	female	no	general practitioner	ambulatory	orange	other	specialist	malaise	no	no	no	no	no	no	no	no	no	0	low	no	no	no	no	0	no					no						no						home	same	328
1123	63	female	yes	self-refferal	ambulance	yellow	ED physician	ED phycisian	other	no	no	no	yes	no	no	no	no	no	0	low	yes	yes	no	no	0	no					no						no						home	same	118
1124	53	male	yes	general practitioner	ambulance	yellow	cardiology	specialist	chest pain	no	yes	no	no	no	no	no	no	no	0	low	no	no	no	no	0	no					no						no						admission ward	same	258
1125	1	female	no	self-refferal	ambulatory	yellow	other	specialist	other	no	no	no	no	no	no	no	no	no	0	low	yes	yes	no	no	0	no					no						no						outpatient follow-up	same	211
1126	55	male	yes	self-refferal	ambulance	orange	ED physician	ED phycisian	traumatic injury	no	no	no	no	no	no	no	no	no	0	low	no	no	yes	no	0	no					no						no						home	same	203
1127	47	female	yes	self-refferal	ambulance	yellow	ED physician	ED phycisian	abdominal pain	no	no	no	no	no	no	no	no	no	0	low	no	yes	no	no	0	no					no						no						home	same	112
1128	50	female	yes	self-refferal	ambulance	orange	cardiology	specialist	chest pain	yes	yes	no	no	no	no	no	no	no	2	low	no	no	no	no	0	no					no						no						outpatient follow-up	same	287
1129	35	female	yes	specialist	ambulatory	yellow	surgery	specialist	other	no	no	yes	no	no	no	no	yes	no	3	low	no	no	no	no	0	no					no						no						outpatient follow-up	same	107
1130	76	male	yes	specialist	ambulatory	green	ED physician	ED phycisian	traumatic injury	no	yes	no	no	no	no	no	no	no	0	low	no	no	no	no	0	no					no						no						outpatient follow-up	same	112
1131	19	female	yes	specialist	ambulatory	yellow	ED physician	ED phycisian	traumatic injury	no	no	no	no	no	no	no	no	no	0	low	no	no	no	no	0	no					no						no						outpatient follow-up	same	40
1132	73	male	yes	specialist	ambulatory	green	other	specialist	traumatic injury	no	no	no	no	no	no	no	yes	no	3	low	no	no	no	no	0	no					no						no						home	same	27
1133	46	female	yes	general practitioner	ambulatory	yellow	internal medicine	specialist	other	no	yes	no	no	no	no	no	no	no	0	low	no	no	no	yes	1	yes	other	exclusion diagnosis		yes	no						no						outpatient follow-up	same	250
1134	68	male	yes	self-refferal	ambulance	orange	cardiology	specialist	chest pain	no	yes	no	no	no	no	no	yes	no	2	low	no	no	no	no	0	no					no						no						admission ward	same	240
1135	53	male	yes	specialist	ambulatory	green	ED physician	ED phycisian	traumatic injury	no	no	no	no	no	no	no	no	no	0	low	no	no	no	no	0	no					no						no						outpatient follow-up	same
1136	50	female	yes	specialist	ambulatory	yellow	ED physician	ED phycisian	traumatic injury	no	no	no	no	no	no	no	no	no	0	low	no	no	no	no	0	no					no						no						home	same	52
1137	17	male	yes	self-refferal	ambulance	yellow	ED physician	ED phycisian	other	no	no	no	no	no	no	no	no	no	0	low	no	no	no	no	0	no					no						no						home	same	117
1138	3	male	no	self-refferal	ambulatory	green	ED physician	ED phycisian	other	no	no	no	no	no	no	no	no	no	0	low	no	no	no	no	0	no					no						no						home	same	40
1139	12	male	no	self-refferal	ambulance	yellow	ED physician	ED phycisian	traumatic injury	no	no	no	no	no	no	no	no	no	0	low	no	no	no	yes	1	yes	surgery	specific procedure	operation	yes	no						no						admission ward	same	173
1140	0	male	no	general practitioner	ambulatory	orange	other	specialist	dyspnea	no	no	no	no	no	no	no	no	no	0	low	yes	yes	no	no	0	no					no						no						admission ward	same	163
1141	15	male	no	self-refferal	ambulatory	green	ED physician	ED phycisian	traumatic injury	no	no	yes	no	no	no	no	no	no	1	low	no	no	no	no	0	no					no						no						home	same	73
1142	27	female	yes	specialist	ambulatory	yellow	other	specialist	other	no	no	no	no	no	no	no	no	no	0	low	no	no	no	no	0	no					no						no						outpatient follow-up	same	61
1143	51	female	yes	specialist	ambulatory	yellow	surgery	specialist	abdominal pain	no	no	no	no	no	no	yes	no	no	0	low	no	no	no	no	0	no					no						no						home	same
1144	28	female	yes	general practitioner	ambulance	orange	ED physician	ED phycisian	traumatic injury	no	no	no	no	no	no	no	no	no	0	low	no	no	yes	no	0	no					no						no						home	same	120
1145	53	female	yes	general practitioner	ambulatory	yellow	ED physician	ED phycisian	other	no	no	no	no	no	no	no	no	no	0	low	no	no	no	yes	1	yes	surgery	specific procedure		yes	no						no						admission ward	same	154
1146	29	male	yes	self-refferal	ambulance	orange	ED physician	ED phycisian	traumatic injury	no	no	no	no	no	no	no	no	no	0	low	no	no	no	no	0	no					no						no						home	same	92
1147	82	female	yes	self-refferal	ambulance	yellow	ED physician	ED phycisian	other	no	yes	no	no	no	no	no	no	no	0	low	no	no	no	yes	1	yes	surgery	admission department		yes	no						no						admission ward	same
1148	63	male	yes	specialist	ambulance	yellow	cardiology	specialist	palpitations	yes	no	no	yes	no	no	no	no	no	0	low	no	no	no	no	0	no					no						no						outpatient follow-up	same	144
1149	14	male	no	self-refferal	ambulance	yellow	ED physician	ED phycisian	other	no	no	no	no	no	no	no	no	no	0	low	no	no	no	no	0	no					no						no						home	same	68
1150	42	male	yes	general practitioner	ambulatory	yellow	ED physician	ED phycisian	malaise	no	no	no	no	no	no	no	no	no	0	low	no	no	no	no	0	no					no						no						home	same	184
1151	35	male	yes	general practitioner	ambulatory	yellow	other	specialist	other	no	no	no	no	no	no	no	no	no	0	low	no	no	no	no	0	no					no						no						outpatient follow-up	same	36
1152	37	male	yes	self-refferal	ambulatory	green	ED physician	ED phycisian	other	no	no	no	no	no	no	no	no	no	0	low	no	no	no	no	0	no					no						no						outpatient follow-up	same	64
1153	81	male	yes	self-refferal	ambulance	yellow	ED physician	ED phycisian	other	no	no	no	yes	no	no	no	no	no	0	low	no	no	no	yes	1	yes	neurology	pre-existing agreement	CT-cerebrum	yes	no						no						home	same	135
1154	4	female	no	self-refferal	ambulance	orange	ED physician	ED phycisian	other	no	no	no	yes	no	no	no	no	no	0	low	no	no	no	no	0	no					no						no						outpatient follow-up	same	160
1155	2	male	no	self-refferal	ambulatory	orange	other	specialist	other	no	no	yes	no	no	no	no	no	no	1	low	no	no	no	no	0	no					no						no						home	same	96
1156	48	male	yes	general practitioner	ambulatory	green	ED physician	ED phycisian	other	no	no	no	no	no	no	no	no	no	0	low	no	no	no	no	0	no					no						no						home	same	28
1157	25	female	yes	general practitioner	ambulance	orange	internal medicine	specialist	dyspnea	no	no	no	no	no	no	no	no	no	0	low	no	no	no	no	0	no					no						no						admission ward	same	151
1158	36	female	yes	general practitioner	ambulatory	yellow	ED physician	ED phycisian	other	no	no	no	no	no	no	no	no	no	0	low	no	no	no	no	0	no					no						no						home	same	112
1159	15	female	no	self-refferal	ambulance	yellow	ED physician	ED phycisian	other	no	no	no	no	no	no	no	no	no	0	low	no	no	no	no	0	no					no						no						home	same	73
1160	44	male	yes	self-refferal	ambulatory	orange	ED physician	ED phycisian	dyspnea	no	no	no	no	no	no	no	no	no	0	low	no	no	no	yes	1	yes	internal medicine	admission department		yes	no						no						admission ward	same
1161	18	male	yes	self-refferal	ambulatory	yellow	ED physician	ED phycisian	traumatic injury	no	no	no	no	no	no	no	no	no	0	low	no	no	no	no	0	no					no						no						home	same	45
1162	25	male	yes	self-refferal	ambulance	yellow	ED physician	ED phycisian	traumatic injury	no	no	no	no	no	no	no	no	no	0	low	no	no	no	no	0	no					no						no						home	same	38
1163	62	female	yes	general practitioner	ambulance	orange	internal medicine	specialist	malaise	yes	no	no	no	no	no	no	yes	no	3	low	no	no	no	no	0	no					no						no						admission ward	same	109
1164	3	female	no	general practitioner	ambulatory	orange	other	specialist	dyspnea	no	no	no	no	no	no	no	no	no	0	low	no	no	no	no	0	no					no						no						admission ward	same
1165	48	female	yes	general practitioner	ambulatory	orange	neurology	specialist	headdache	no	no	no	no	no	no	no	no	no	0	low	no	no	no	yes	1	missed	internal medicine				no						no						admission ward	next
1166	70	female	yes	self-refferal	ambulance	orange	ED physician	ED phycisian	chest pain	yes	no	no	no	no	no	no	no	no	2	low	no	no	no	yes	1	yes	cardiology	exclusion diagnosis	ACS	no	no						no						outpatient follow-up	next
1167	70	male	yes	self-refferal	ambulance	orange	ED physician	ED phycisian	malaise	no	yes	no	yes	yes	no	no	no	no	3	low	no	no	no	yes	1	yes	neurology	exclusion diagnosis		no	no						no						home	next
1168	13	female	no	general practitioner	ambulatory	yellow	other	specialist	malaise	no	no	no	no	no	no	no	no	no	0	low	no	no	no	no	0	no					no						no						home	same
1169	3	female	no	general practitioner	ambulatory	yellow	surgery	specialist	abdominal pain	no	no	no	no	no	no	no	no	no	0	low	no	no	no	no	0	no					no						no						admission ward	same
1170	24	female	yes	general practitioner	ambulatory	yellow	surgery	specialist	abdominal pain	no	no	no	no	no	no	no	no	no	0	low	no	no	no	no	0	no					no						no						outpatient follow-up	same
1171	55	female	yes	general practitioner	ambulatory	yellow	other	specialist	other	no	no	no	no	no	no	no	no	no	0	low	no	no	no	no	0	no					no						no						outpatient follow-up	same	21
1172	0	female	no	general practitioner	ambulatory	orange	other	specialist	malaise	no	no	no	no	no	no	no	no	no	0	low	no	no	no	no	0	no					no						no						admission ward	same	173
1173	55	male	yes	general practitioner	ambulatory	yellow	surgery	specialist	other	no	no	no	no	no	no	no	no	no	0	low	no	no	no	no	0	no					no						no						admission ward	same
1174	21	male	yes	specialist	ambulatory	green	ED physician	ED phycisian	other	no	no	yes	no	no	no	no	no	no	1	low	no	no	no	no	0	no					no						no						home	same	55
1175	55	male	yes	specialist	ambulatory	green	ED physician	ED phycisian	traumatic injury	no	no	no	no	no	no	no	no	no	0	low	no	no	no	no	0	no					no						no						home	same	59
1176	4	male	no	general practitioner	ambulatory	yellow	ED physician	ED phycisian	traumatic injury	no	no	no	no	no	no	no	no	no	0	low	no	no	no	no	0	no					no						no						outpatient follow-up	same	167
1177	46	male	yes	general practitioner	ambulatory	yellow	other	specialist	other	no	no	yes	no	no	no	no	no	no	1	low	no	no	no	no	0	no					no						no						outpatient follow-up	same	107
1178	66	female	yes	self-refferal	ambulance	yellow	ED physician	ED phycisian	traumatic injury	yes	no	no	no	no	no	no	no	no	1	low	no	no	no	yes	1	yes	other	other		yes	no						no						admission ward	same
1179	74	male	yes	specialist	ambulatory	yellow	ED physician	ED phycisian	other	no	no	no	no	no	no	yes	yes	no	2	low	no	no	no	no	0	no					no						no						admission ward	same	304
1180	74	male	yes	general practitioner	ambulance	orange	internal medicine	specialist	malaise	no	no	no	no	no	no	no	yes	no	3	low	no	no	no	yes	1	yes	surgery	exclusion diagnosis		yes	no						no						admission ward	same	308
1181	42	female	yes	self-refferal	ambulatory	yellow	other	specialist	other	no	no	no	no	no	no	no	no	no	0	low	no	yes	no	no	0	no					no						no						outpatient follow-up	same	32
1182	68	female	yes	general practitioner	ambulatory	yellow	surgery	specialist	abdominal pain	yes	no	no	no	no	no	no	no	no	0	low	no	no	no	yes	1	yes	cardiology	other		yes	no						no						admission ward	same	372
1183	49	male	yes	general practitioner	ambulatory	yellow	other	specialist	other	no	no	no	no	no	no	no	no	no	0	low	no	no	no	no	0	no					no						no						outpatient follow-up	same	53
1184	68	female	yes	general practitioner	ambulance	orange	internal medicine	specialist	dyspnea	no	yes	no	no	no	no	no	no	no	0	low	no	no	no	no	0	no					no						no						admission ward	same	374
1185	78	female	yes	self-refferal	ambulance	yellow	ED physician	ED phycisian	malaise	yes	no	no	no	no	no	no	no	no	0	low	no	no	no	no	0	no					no						no						home	same	168
1186	9	female	no	self-refferal	ambulatory	yellow	ED physician	ED phycisian	traumatic injury	no	no	no	no	no	no	no	no	no	0	low	no	no	no	no	0	no					no						no						outpatient follow-up	same	110
1187	23	female	yes	general practitioner	ambulatory	green	ED physician	ED phycisian	traumatic injury	no	no	no	no	no	no	no	no	no	0	low	yes	yes	no	no	0	no					no						no						home	same	80
1188	82	female	yes	self-refferal	ambulance	orange	ED physician	ED phycisian	malaise	no	no	no	yes	no	no	no	no	no	0	low	no	no	yes	no	0	no					no						no						admission ward	same	5
1189	0	female	no	general practitioner	ambulatory	yellow	neurology	specialist	other	no	no	no	no	no	no	no	no	no	0	low	no	no	no	yes	1	yes	emergency physician	pre-existing agreement	trauma screening	yes	no						no						home	same
1190	77	male	yes	self-refferal	ambulatory	yellow	surgery	specialist	other	yes	yes	yes	no	no	no	no	no	no	2	low	no	no	no	no	0	no					no						no						outpatient follow-up	same	201
1191	72	female	yes	self-refferal	ambulatory	yellow	ED physician	ED phycisian	other	no	no	yes	no	no	no	no	no	no	1	low	no	no	no	no	0	no					no						no						admission ward	same	365
1192	85	female	yes	general practitioner	ambulance	yellow	other	specialist	malaise	no	no	yes	no	no	no	no	yes	no	5	high	no	no	no	no	0	no					no						no						admission ward	same	143
1193	1	female	no	self-refferal	ambulance	yellow	ED physician	ED phycisian	other	no	no	no	no	no	no	no	no	no	0	low	no	no	no	yes	1	yes	neurology	pre-existing agreement		yes	no						no						admission ward	same	152
1194	1	male	no	general practitioner	ambulatory	green	other	specialist	other	no	no	no	no	no	no	no	no	no	0	low	no	no	no	no	0	no					no						no						outpatient follow-up	same	156
1195	38	female	yes	specialist	ambulatory	yellow	cardiology	specialist	palpitations	yes	yes	no	no	no	no	no	no	no	0	low	no	no	no	yes	1	yes	emergency physician	pre-existing agreement	cardioversion	yes	no						no						outpatient follow-up	same	238
1196	35	male	yes	specialist	ambulatory	green	ED physician	ED phycisian	traumatic injury	no	no	no	no	no	no	no	no	no	0	low	no	no	no	no	0	no					no						no						outpatient follow-up	same	65
1197	16	male	no	general practitioner	ambulatory	orange	ED physician	ED phycisian	malaise	no	no	no	no	no	no	no	no	no	0	low	no	no	no	yes	1	yes	surgery	specific procedure	operation	yes	no						no						admission ward	same	195
1198	49	female	yes	general practitioner	ambulatory	yellow	ED physician	ED phycisian	traumatic injury	no	no	no	no	no	no	no	no	no	0	low	no	no	no	no	0	no					no						no						outpatient follow-up	same	182
1199	53	male	yes	self-refferal	ambulatory	green	ED physician	ED phycisian	other	no	no	no	no	no	no	no	no	no	2	low	no	no	no	no	0	no					no						no						outpatient follow-up	same	233
1200	73	male	yes	specialist	ambulatory	green	internal medicine	specialist	abdominal pain	no	yes	no	no	no	no	no	yes	no	7	high	yes	yes	no	no	0	no					no						no						outpatient follow-up	same	138
1201	60	female	yes	self-refferal	ambulatory	green	ED physician	ED phycisian	other	no	yes	no	no	no	no	no	no	no	1	low	no	no	no	no	0	no					no						no						outpatient follow-up	same	191
1202	84	female	yes	self-refferal	ambulance	orange	ED physician	ED phycisian	chest pain	no	yes	yes	no	no	no	no	no	no	1	low	no	no	no	yes	1	yes	cardiology	admission department		no	no						no						home	same	288
1203	60	female	yes	general practitioner	ambulance	yellow	ED physician	ED phycisian	collaps	no	yes	no	no	no	no	no	no	no	0	low	no	no	no	yes	1	yes	cardiology	exclusion diagnosis	ACS	no	no						no						home	same	341
1204	29	female	yes	general practitioner	ambulatory	yellow	other	specialist	other	no	no	no	no	no	no	no	no	no	0	low	no	no	no	no	0	no					no						no						admission ward	same	151
1205	24	female	yes	self-refferal	ambulatory	yellow	ED physician	ED phycisian	other	no	no	no	no	no	no	no	no	no	0	low	no	no	no	no	0	no					no						no						outpatient follow-up	same	224
1206	10	male	no	self-refferal	ambulatory	green	ED physician	ED phycisian	dyspnea	no	no	no	no	no	no	no	no	no	0	low	no	no	no	no	0	no					no						no						home	same	148
1207	62	male	yes	general practitioner	ambulance	orange	ED physician	ED phycisian	malaise	yes	yes	no	no	yes	no	no	no	no	5	high	no	no	no	yes	3	yes	intensive care	admission IC		yes	no	emergency physician	internal medicine	admission department		no	yes	emergency physician	cardiology	other		yes	admission ICU	same	340
1208	85	female	yes	self-refferal	ambulance	red	ED physician	ED phycisian	collaps	no	no	no	no	no	no	no	no	no	0	low	no	no	yes	no	0	no					no						no						other	same
1209	84	female	yes	general practitioner	ambulatory	yellow	other	specialist	traumatic injury	yes	yes	no	no	no	no	no	no	no	2	low	no	no	no	no	0	no					no						no						home	same	196
1210	59	male	yes	general practitioner	ambulatory	yellow	internal medicine	specialist	malaise	no	yes	no	no	no	no	no	no	no	1	low	no	no	no	no	0	no					no						no						admission ward	same	274
1211	23	female	yes	self-refferal	ambulance	orange	ED physician	ED phycisian	traumatic injury	no	no	no	no	no	no	no	no	no	0	low	no	no	yes	no	0	no					no						no						outpatient follow-up	same	166
1212	77	female	yes	self-refferal	ambulance	red	ED physician	ED phycisian	malaise	yes	yes	no	no	no	no	no	no	no	2	low	no	no	yes	no	0	no					no						no						admission ward	same	42
1213	15	male	no	general practitioner	ambulatory	green	ED physician	ED phycisian	traumatic injury	no	no	no	no	no	no	no	no	no	0	low	no	no	no	no	0	no					no						no						outpatient follow-up	same	71
1214	0	male	no	general practitioner	ambulatory	green	other	specialist	other	no	no	no	no	no	no	no	no	no	0	low	no	no	no	no	0	no					no						no						outpatient follow-up	same	68
1215	19	female	yes	self-refferal	ambulatory	yellow	ED physician	ED phycisian	traumatic injury	no	no	no	no	no	no	no	no	no	0	low	no	no	no	no	0	no					no						no						outpatient follow-up	same	71
1216	53	male	yes	self-refferal	ambulatory	not triaged	surgery	specialist	traumatic injury	no	no	no	no	no	no	no	no	no	0	low	no	no	no	no	0	no					no						no						home	same	15
1217	26	male	yes	general practitioner	ambulatory	yellow	ED physician	ED phycisian	abdominal pain	no	no	no	no	no	no	no	no	no	0	low	no	no	no	yes	1	missed	surgery				no						no						admission ward	same
1218	58	female	yes	self-refferal	ambulance	orange	ED physician	ED phycisian	chest pain	no	no	no	no	yes	no	no	yes	no	4	high	no	no	no	no	0	no					no						no						home	same	104
1219	0	male	no	self-refferal	ambulance	red	ED physician	ED phycisian	malaise	no	no	no	no	no	no	no	no	no	0	low	no	no	yes	no	0	no					no						no						admission ICU	same	105
1220	48	male	yes	general practitioner	ambulatory	yellow	ED physician	ED phycisian	malaise	yes	no	no	yes	no	no	no	no	no	0	low	no	no	no	no	0	no					no						no						home	same
1221	15	male	no	general practitioner	ambulatory	green	other	specialist	other	no	no	no	no	no	no	no	no	no	0	low	no	no	no	no	0	no					no						no						outpatient follow-up	same	39
1222	29	female	yes	self-refferal	ambulance	orange	ED physician	ED phycisian	abdominal pain	no	no	no	no	no	no	no	no	no	0	low	no	no	no	yes	1	yes	internal medicine	admission department		yes	no						no						admission ward	same
1223	3	male	no	self-refferal	ambulance	orange	other	specialist	malaise	no	no	no	no	no	no	no	no	no	0	low	no	no	no	no	0	no					no						no						admission ward	same
1224	21	female	yes	self-refferal	ambulance	orange	ED physician	ED phycisian	other	no	no	yes	no	no	no	no	no	no	1	low	no	no	no	yes	1	yes	other	specific procedure	fiber endoscopy	yes	no						no						home	same
1225	75	male	yes	general practitioner	ambulance	yellow	ED physician	ED phycisian	traumatic injury	yes	no	no	no	no	no	no	yes	no	3	low	no	no	no	no	0	no					no						no						admission ward	same
1226	48	female	yes	specialist	ambulatory	yellow	other	specialist	other	no	no	yes	no	no	no	no	no	no	1	low	no	no	no	no	0	no					no						no						admission ward	same	124
1227	82	male	yes	specialist	ambulatory	yellow	other	specialist	other	yes	yes	no	no	no	no	no	no	no	3	low	no	no	no	yes	2	yes	internal medicine	other		yes	no	other	emergency physician	specific procedure		yes	no						outpatient follow-up	same	161
1228	75	female	yes	specialist	ambulatory	orange	other	specialist	other	no	no	no	no	no	no	no	no	no	0	low	no	no	no	no	0	no					no						no						admission ward	same	178
1229	81	female	yes	general practitioner	ambulance	yellow	neurology	specialist	headdache	no	yes	no	no	no	no	no	no	no	0	low	no	no	no	no	0	no					no						no						home	same	124
1230	0	male	no	general practitioner	ambulatory	yellow	surgery	specialist	abdominal pain	no	no	no	no	no	no	no	no	no	0	low	no	no	no	no	0	no					no						no						admission ward	same	48
1231	30	female	yes	general practitioner	ambulatory	yellow	internal medicine	specialist	other	no	no	no	no	no	no	no	no	no	0	low	no	no	no	no	0	no					no						no						outpatient follow-up	same	286
1232	75	female	yes	general practitioner	ambulatory	orange	other	specialist	malaise	no	no	no	no	no	no	no	yes	no	2	low	no	no	no	yes	2	yes	other	exclusion diagnosis		yes	no	other	other	specific procedure		yes	no						admission ICU	same	170
1233	71	male	yes	specialist	ambulatory	orange	cardiology	specialist	dyspnea	yes	yes	no	no	no	no	no	no	no	4	high	no	no	no	yes	1	yes	internal medicine	exclusion diagnosis		yes	no						no						home	same	355
1234	28	male	yes	self-refferal	ambulance	yellow	ED physician	ED phycisian	collaps	no	no	no	no	no	no	no	yes	no	2	low	no	no	no	yes	1	yes	neurology	exclusion diagnosis		yes	no						no						home	same	195
1235	29	male	yes	specialist	ambulatory	green	ED physician	ED phycisian	traumatic injury	no	no	no	no	no	no	no	no	no	0	low	no	no	no	no	0	no					no						no						home	same
1236	72	male	yes	general practitioner	ambulance	yellow	internal medicine	specialist	traumatic injury	yes	no	yes	no	no	no	no	no	no	4	high	no	no	no	yes	1	yes	other	exclusion diagnosis		yes	no						no						admission ward	same	301
1237	73	female	yes	general practitioner	ambulance	yellow	internal medicine	specialist	collaps	no	yes	no	yes	no	no	no	yes	yes	4	high	no	no	no	yes	1	yes	neurology	exclusion diagnosis		yes	no						no						admission ward	same	166
1238	15	male	no	self-refferal	ambulance	yellow	ED physician	ED phycisian	traumatic injury	no	no	no	no	no	no	no	no	no	0	low	no	no	no	no	0	no					no						no						outpatient follow-up	same
1239	81	female	yes	specialist	ambulatory	orange	cardiology	specialist	chest pain	yes	yes	no	no	yes	no	no	no	no	3	low	no	no	no	no	0	no					no						no						home	same	189
1240	17	female	yes	specialist	ambulatory	green	ED physician	ED phycisian	malaise	no	no	no	no	no	no	no	no	no	0	low	no	no	no	no	0	no					no						no						home	same	188
1241	1	male	no	self-refferal	ambulance	orange	ED physician	ED phycisian	other	no	no	no	no	no	no	no	no	no	0	low	no	no	no	yes	1	yes	neurology	admission department		yes	no						no						admission ward	same	115
1242	86	male	yes	general practitioner	ambulance	orange	other	specialist	dyspnea	yes	yes	yes	no	no	no	no	no	no	3	low	no	no	no	no	0	no					no						no						admission ward	same	118
1243	87	male	yes	general practitioner	ambulatory	green	other	specialist	dyspnea	no	no	no	no	no	no	no	no	no	0	low	no	no	no	no	0	no					no						no						outpatient follow-up	same	367
1244	73	male	yes	self-refferal	ambulance	yellow	ED physician	ED phycisian	traumatic injury	no	yes	no	no	no	no	no	no	no	1	low	no	no	no	yes	1	yes	surgery	specific procedure	operation	no	no						no						outpatient follow-up	same	323
1245	14	male	no	self-refferal	ambulatory	orange	ED physician	ED phycisian	traumatic injury	no	no	no	no	no	no	no	no	no	0	low	no	no	no	no	0	no					no						no						outpatient follow-up	same
1246	54	male	yes	self-refferal	ambulance	red	ED physician	ED phycisian	malaise	no	no	no	no	no	no	no	no	no	0	low	no	no	yes	no	0	no					no						no						other	same
1247	57	male	yes	general practitioner	ambulatory	green	surgery	specialist	traumatic injury	no	no	no	no	no	no	no	no	no	0	low	no	no	no	no	0	no					no						no						outpatient follow-up	same	136
1248	47	male	yes	general practitioner	ambulance	yellow	ED physician	ED phycisian	chest pain	no	no	no	no	no	no	no	no	no	0	low	no	no	no	no	0	no					no						no						home	same
1249	47	male	yes	general practitioner	ambulance	yellow	other	specialist	headdache	no	no	no	no	no	no	no	no	no	0	low	no	no	no	yes	2	yes	other	exclusion diagnosis		yes	no	other	neurology	exclusion diagnosis		yes	no						home	same	332
1250	61	female	yes	self-refferal	ambulance	orange	ED physician	ED phycisian	chest pain	no	yes	no	no	no	no	no	no	no	2	low	no	no	no	no	0	no					no						no						home	same
1251	34	female	yes	general practitioner	ambulatory	green	neurology	specialist	malaise	no	no	no	no	no	no	no	no	no	0	low	no	no	no	no	0	no					no						no						admission ward	same	244
1252	31	male	yes	general practitioner	ambulance	red	ED physician	ED phycisian	chest pain	yes	yes	no	no	no	no	no	no	no	2	low	no	no	yes	no	0	no					no						no						other	same	28
1253	54	female	yes	general practitioner	ambulatory	yellow	internal medicine	specialist	traumatic injury	no	yes	no	no	no	no	no	no	no	0	low	no	no	no	no	0	no					no						no						home	same	157
1254	88	female	yes	specialist	ambulatory	yellow	internal medicine	specialist	malaise	no	yes	no	no	no	no	no	yes	no	3	low	no	no	no	no	0	no					no						no						admission ward	same
1255	49	female	yes	self-refferal	ambulatory	orange	ED physician	ED phycisian	other	no	no	no	no	no	no	no	no	no	0	low	no	no	no	no	0	no					no						no						home	same	93
1256	5	female	no	self-refferal	ambulance	orange	ED physician	ED phycisian	other	no	no	no	no	no	no	no	no	no	0	low	no	no	no	yes	2	yes	other	admission department		no	no	emergency physician	neurology	pre-existing agreement	first seizure	yes	no						outpatient follow-up	same	215
1257	4	female	no	specialist	ambulatory	yellow	other	specialist	abdominal pain	no	no	no	no	no	no	no	no	no	0	low	no	no	no	yes	1	yes	surgery	exclusion diagnosis		yes	no						no						outpatient follow-up	same	177
1258	30	female	yes	specialist	ambulatory	yellow	internal medicine	specialist	dyspnea	no	no	no	no	no	no	no	yes	no	6	high	no	no	no	no	0	no					no						no						admission ward	same	254
1259	62	female	yes	general practitioner	ambulatory	orange	internal medicine	specialist	palpitations	yes	no	no	no	no	no	no	yes	no	6	high	no	no	no	no	0	no					no						no						admission ward	same	236
1260	62	female	yes	self-refferal	ambulance	orange	ED physician	ED phycisian	traumatic injury	yes	yes	no	no	no	no	no	no	no	2	low	no	no	yes	no	0	no					no						no						home	same
1261	80	male	yes	general practitioner	ambulance	green	internal medicine	specialist	traumatic injury	no	no	no	no	no	no	no	no	no	0	low	no	no	no	no	0	no					no						no						home	next
1262	70	female	yes	general practitioner	ambulance	orange	internal medicine	specialist	other	no	no	no	no	no	no	no	no	no	2	low	no	no	no	no	0	no					no						no						admission ward	same	188
1263	26	female	yes	self-refferal	ambulatory	yellow	other	specialist	abdominal pain	no	no	no	no	no	no	no	no	no	0	low	no	no	no	yes	1	yes	emergency physician	exclusion diagnosis		yes	no						no						outpatient follow-up	same
1264	73	female	yes	specialist	ambulance	red	internal medicine	specialist	other	no	yes	no	no	no	no	no	yes	no	2	low	no	no	no	yes	2	yes	other	other		yes	no	other	intensive care	admission IC		no	no						admission ward	same	144
1265	36	female	yes	self-refferal	ambulatory	yellow	ED physician	ED phycisian	traumatic injury	no	no	no	no	no	no	no	no	no	0	low	no	no	no	yes	1	missed	internal medicine				no						no						outpatient follow-up	next
1266	60	female	yes	general practitioner	ambulance	orange	neurology	specialist	malaise	no	no	no	yes	no	no	no	yes	no	4	high	no	no	no	no	0	no					no						no						admission ward	same	116
1267	15	female	no	specialist	ambulatory	green	other	specialist	abdominal pain	no	no	no	no	no	no	no	no	no	0	low	no	no	no	no	0	no					no						no						admission ward	same
1268	45	female	yes	specialist	ambulatory	orange	internal medicine	specialist	chest pain	no	no	yes	no	no	no	no	yes	no	7	high	no	no	no	no	0	no					no						no						admission ward	next
1269	32	male	yes	self-refferal	ambulatory	yellow	ED physician	ED phycisian	collaps	no	no	no	no	no	no	no	no	no	0	low	no	no	no	no	0	no					no						no						home	same	108
1270	45	male	yes	specialist	ambulatory	yellow	ED physician	ED phycisian	traumatic injury	no	no	no	no	no	no	no	no	no	0	low	no	no	no	no	0	no					no						no						outpatient follow-up	same
1271	42	male	yes	general practitioner	ambulance	orange	cardiology	specialist	chest pain	no	no	no	no	no	no	no	no	no	0	low	no	no	no	no	0	no					no						no						outpatient follow-up	same	116
1272	57	male	yes	general practitioner	ambulance	orange	cardiology	specialist	chest pain	yes	no	no	no	no	no	no	no	no	1	low	no	no	no	no	0	no					no						no						outpatient follow-up	same	106
1273	67	male	yes	specialist	ambulatory	yellow	cardiology	specialist	palpitations	yes	yes	no	no	no	no	no	no	no	0	low	no	no	no	yes	1	yes	emergency physician	pre-existing agreement	cardioversion	yes	no						no						outpatient follow-up	same	176
1274	68	male	yes	specialist	ambulatory	yellow	cardiology	specialist	dyspnea	yes	yes	no	no	no	no	no	no	no	1	low	no	no	no	yes	1	yes	emergency physician	pre-existing agreement	cardioversion	yes	no						no						outpatient follow-up	same	289
1275	77	male	yes	specialist	ambulatory	green	cardiology	specialist	dyspnea	yes	yes	yes	no	no	no	no	no	no	3	low	no	no	no	no	0	no					no						no						outpatient follow-up	same	257
1276	76	female	yes	self-refferal	ambulance	yellow	ED physician	ED phycisian	traumatic injury	no	no	no	no	no	no	no	no	no	1	low	no	no	no	yes	1	yes	surgery	specific procedure	operation	yes	no						no						admission ward	same	103
1277	19	male	yes	general practitioner	ambulatory	green	ED physician	ED phycisian	traumatic injury	no	no	no	no	no	no	no	no	no	0	low	no	no	no	no	0	no					no						no						home	same	32
1278	47	male	yes	general practitioner	ambulance	orange	cardiology	specialist	chest pain	no	no	yes	no	no	no	no	no	no	1	low	no	no	no	no	0	no					no						no						outpatient follow-up	same	117
1279	55	female	yes	specialist	ambulatory	green	ED physician	ED phycisian	traumatic injury	no	no	no	no	no	no	no	no	yes	0	low	no	no	no	no	0	no					no						no						outpatient follow-up	same	72
1280	40	male	yes	specialist	ambulatory	yellow	internal medicine	specialist	malaise	no	no	no	no	no	no	no	yes	no	2	low	no	no	no	no	0	no					no						no						admission ward	same	87
1281	58	male	yes	general practitioner	ambulance	yellow	internal medicine	specialist	dyspnea	no	no	no	no	no	no	no	no	no	0	low	no	no	no	no	0	no					no						no						admission ward	same	116
1282	64	female	yes	specialist	ambulatory	green	cardiology	specialist	traumatic injury	no	no	no	no	no	no	no	no	no	2	low	no	no	no	no	0	no					no						no						home	same	104
1283	76	female	yes	self-refferal	ambulance	red	ED physician	ED phycisian	collaps	yes	no	no	no	no	no	no	no	no	1	low	no	no	yes	no	0	no					no						no						other	same
1284	70	male	yes	general practitioner	ambulance	orange	cardiology	specialist	dyspnea	yes	no	yes	no	no	no	no	yes	no	4	high	no	yes	no	yes	1	yes	internal medicine	other		yes	no						no						home	same	224
1285	32	female	yes	self-refferal	ambulatory	green	ED physician	ED phycisian	traumatic injury	no	no	no	no	no	no	no	no	no	0	low	no	no	no	no	0	no					no						no						home	same	62
1286	42	female	yes	self-refferal	ambulatory	yellow	ED physician	ED phycisian	other	no	no	yes	no	no	no	no	no	no	1	low	no	no	no	no	0	no					no						no						outpatient follow-up	same	113
1287	59	female	yes	general practitioner	ambulatory	green	internal medicine	specialist	malaise	no	no	no	no	no	no	no	yes	no	2	low	no	no	no	no	0	no					no						no						admission ward	same	88
1288	51	male	yes	general practitioner	ambulatory	green	ED physician	ED phycisian	traumatic injury	yes	no	no	no	no	no	no	no	no	1	low	no	no	no	no	0	no					no						no						outpatient follow-up	same	64
1289	47	female	yes	general practitioner	ambulance	orange	cardiology	specialist	chest pain	yes	no	no	no	no	no	no	no	no	2	low	no	no	no	yes	1	yes	internal medicine	other		yes	no						no						outpatient follow-up	same	217
1290	54	female	yes	specialist	ambulatory	yellow	ED physician	ED phycisian	traumatic injury	no	yes	no	no	no	no	no	no	no	0	low	no	no	no	no	0	no					no						no						outpatient follow-up	same	55
1291	60	male	yes	general practitioner	ambulatory	green	cardiology	specialist	chest pain	no	no	no	no	no	no	no	no	no	0	low	no	no	no	no	0	no					no						no						outpatient follow-up	same
1292	21	female	yes	self-refferal	ambulatory	yellow	ED physician	ED phycisian	other	no	no	no	no	no	no	no	no	no	0	low	no	no	no	no	0	no					no						no						home	same	58
1293	50	male	yes	specialist	ambulatory	yellow	other	specialist	malaise	no	no	no	no	no	no	no	no	no	0	low	no	no	no	no	0	no					no						no						outpatient follow-up	same	139
1294	54	male	yes	general practitioner	ambulatory	yellow	ED physician	ED phycisian	dyspnea	no	no	no	no	no	no	no	no	no	0	low	no	no	no	no	0	no					no						no						home	same	190
1295	37	female	yes	specialist	ambulatory	green	ED physician	ED phycisian	traumatic injury	no	no	no	no	no	no	no	no	no	0	low	no	no	no	no	0	no					no						no						outpatient follow-up	same	23
1296	69	female	yes	general practitioner	ambulatory	yellow	internal medicine	specialist	dyspnea	no	no	yes	no	no	no	no	yes	no	4	high	no	no	no	no	0	no					no						no						admission ward	same	227
1297	21	female	yes	specialist	ambulatory	yellow	internal medicine	specialist	malaise	no	no	no	no	no	no	no	yes	yes	1	low	no	no	no	no	0	no					no						no						home	same	93
1298	19	female	yes	general practitioner	ambulatory	yellow	ED physician	ED phycisian	other	no	no	no	no	no	no	no	no	no	0	low	no	no	no	no	0	no					no						no						home	same
1299	52	male	yes	general practitioner	ambulatory	green	ED physician	ED phycisian	traumatic injury	no	no	no	no	no	no	no	no	no	0	low	no	no	no	no	0	no					no						no						home	same	71
1300	0	female	no	general practitioner	ambulatory	orange	other	specialist	malaise	no	no	no	no	no	no	no	no	no	0	low	no	no	no	no	0	no					no						no						home	same	133
1301	1	male	no	general practitioner	ambulatory	orange	other	specialist	dyspnea	no	no	no	no	no	no	no	no	no	0	low	no	no	no	no	0	no					no						no						admission ward	same	141
1302	61	male	yes	self-refferal	ambulatory	red	ED physician	ED phycisian	other	no	yes	no	no	no	no	no	no	no	1	low	no	no	no	no	0	no					no						no						home	same	102
1303	10	female	no	specialist	ambulatory	green	ED physician	ED phycisian	traumatic injury	no	no	no	no	no	no	no	no	no	0	low	no	no	no	no	0	no					no						no						outpatient follow-up	same	43
1304	6	male	no	general practitioner	ambulatory	yellow	other	specialist	dyspnea	no	no	yes	no	no	no	no	no	no	1	low	no	no	no	no	0	no					no						no						outpatient follow-up	same	155
1305	62	female	yes	specialist	ambulatory	yellow	internal medicine	specialist	abdominal pain	no	no	no	no	no	no	no	yes	no	6	high	no	no	no	no	0	no					no						no						admission ward	same
1306	49	male	yes	general practitioner	ambulatory	orange	internal medicine	specialist	dyspnea	no	no	no	no	no	no	no	yes	no	6	high	no	no	no	no	0	no					no						no						home	same
1307	24	female	yes	general practitioner	ambulatory	yellow	other	specialist	other	no	no	no	no	no	no	no	no	no	0	low	no	no	no	no	0	no					no						no						outpatient follow-up	same	130
1308	61	female	yes	general practitioner	ambulance	orange	ED physician	ED phycisian	malaise	no	no	no	no	no	no	no	yes	no	2	low	no	no	yes	no	0	no					no						no						home	same	116
1309	79	female	yes	self-refferal	ambulance	orange	ED physician	ED phycisian	dyspnea	no	no	yes	no	yes	no	no	yes	no	5	high	no	no	no	yes	1	yes	internal medicine	admission department		yes	no						no						admission ward	next
1310	75	female	yes	general practitioner	ambulance	yellow	ED physician	ED phycisian	malaise	no	no	no	no	no	no	no	no	no	0	low	no	no	no	no	0	no					no						no						home	same	126
1311	11	female	no	self-refferal	ambulatory	yellow	ED physician	ED phycisian	malaise	no	no	yes	no	no	no	no	no	no	1	low	no	no	no	no	0	no					no						no						outpatient follow-up	same	129
1312	87	male	yes	self-refferal	ambulance	orange	ED physician	ED phycisian	abdominal pain	no	no	no	no	no	no	yes	no	no	0	low	no	no	yes	no	0	no					no						no						admission ward	same	10
1313	21	female	yes	self-refferal	ambulatory	green	ED physician	ED phycisian	dyspnea	no	no	no	no	no	no	no	no	no	0	low	no	no	no	yes	1	yes	other	other		yes	no						no						outpatient follow-up	same	191
1314	77	male	yes	specialist	ambulatory	green	ED physician	ED phycisian	traumatic injury	yes	no	no	no	no	no	no	yes	no	3	low	no	no	no	yes	1	yes	surgery	other		no	no						no						outpatient follow-up	same	123
1315	15	male	no	specialist	ambulatory	green	ED physician	ED phycisian	traumatic injury	no	no	no	no	no	no	no	no	no	0	low	no	no	no	no	0	no					no						no						outpatient follow-up	same	102
1316	75	female	yes	specialist	ambulatory	yellow	ED physician	ED phycisian	traumatic injury	no	no	no	no	no	no	no	yes	no	2	low	no	no	no	no	0	no					no						no						outpatient follow-up	same	61
1317	54	male	yes	general practitioner	ambulatory	green	other	specialist	other	no	no	no	no	no	no	no	no	no	0	low	no	no	no	no	0	no					no						no						outpatient follow-up	same	75
1318	38	male	yes	general practitioner	ambulatory	yellow	neurology	specialist	other	no	no	no	no	no	no	yes	no	no	1	low	no	no	no	no	0	no					no						no						home	same	233
1319	42	male	yes	general practitioner	ambulatory	yellow	ED physician	ED phycisian	other	no	no	no	no	no	no	no	no	no	0	low	no	no	no	no	0	no					no						no						home	same	260
1320	54	male	yes	general practitioner	ambulance	orange	ED physician	ED phycisian	dyspnea	no	no	no	no	no	no	no	no	no	0	low	no	no	no	yes	1	yes	cardiology	admission department		yes	no						no						admission ward	same	254
1321	54	male	yes	self-refferal	ambulatory	yellow	ED physician	ED phycisian	other	no	no	no	no	no	no	no	no	no	0	low	no	no	no	no	0	no					no						no						home	same	161
1322	68	male	yes	specialist	ambulatory	yellow	internal medicine	specialist	malaise	no	yes	no	no	yes	no	no	yes	no	2	low	no	no	no	no	0	no					no						no						admission ward	same	195
1323	87	female	yes	specialist	ambulance	yellow	neurology	specialist	malaise	no	no	no	no	no	no	no	no	no	0	low	no	no	no	no	0	no					no						no						admission ward	same	295
1324	70	male	yes	general practitioner	ambulatory	green	internal medicine	specialist	other	no	yes	no	no	no	no	no	yes	no	7	high	no	no	no	no	0	no					no						no						outpatient follow-up	same	41
1325	82	female	yes	general practitioner	ambulance	yellow	internal medicine	specialist	malaise	yes	yes	no	no	no	no	no	yes	yes	4	high	no	no	no	no	0	no					no						no						admission ward	same	160
1326	27	female	yes	specialist	ambulatory	green	ED physician	ED phycisian	traumatic injury	no	no	no	no	no	no	no	no	no	0	low	no	no	no	no	0	no					no						no						outpatient follow-up	same	40
1327	81	male	yes	general practitioner	ambulatory	green	internal medicine	specialist	dyspnea	no	no	no	no	no	no	no	yes	no	3	low	no	no	no	no	0	no					no						no						home	same	189
1328	60	male	yes	general practitioner	ambulatory	yellow	cardiology	specialist	dyspnea	no	yes	no	no	no	no	no	no	no	0	low	no	no	no	no	0	no					no						no						outpatient follow-up	same	224
1329	64	male	yes	self-refferal	ambulance	yellow	ED physician	ED phycisian	malaise	no	yes	no	no	no	no	no	no	no	0	low	no	no	no	yes	1	yes	other	specific procedure	GI endoscopy	yes	no						no						admission ward	same	96
1330	10	male	no	self-refferal	ambulatory	yellow	ED physician	ED phycisian	traumatic injury	no	no	no	no	no	no	no	no	no	0	low	no	no	no	yes	1	yes	surgery	specific procedure		yes	no						no						outpatient follow-up	same	158
1331	86	male	yes	general practitioner	ambulance	orange	ED physician	ED phycisian	chest pain	yes	no	yes	no	no	no	no	yes	no	4	high	no	no	no	yes	1	yes	cardiology	exclusion diagnosis	ACS	yes	no						no						admission ward	same	393
1332	54	female	yes	specialist	ambulatory	green	internal medicine	specialist	other	no	no	no	no	no	no	no	yes	no	6	high	no	no	no	no	0	no					no						no						outpatient follow-up	same	215
1333	58	male	yes	general practitioner	ambulatory	green	other	specialist	traumatic injury	no	no	no	no	no	no	no	no	yes	0	low	no	no	no	no	0	no					no						no						admission ward	same	142
1334	60	female	yes	specialist	ambulatory	green	ED physician	ED phycisian	traumatic injury	no	no	no	no	no	no	no	no	no	0	low	no	no	no	no	0	no					no						no						outpatient follow-up	same	109
1335	84	male	yes	self-refferal	ambulance	orange	ED physician	ED phycisian	malaise	yes	yes	yes	no	no	no	no	no	no	2	low	no	no	yes	no	0	no					no						no						home	same	165
1336	62	male	yes	general practitioner	ambulatory	orange	neurology	specialist	malaise	no	no	no	yes	no	no	no	no	no	1	low	no	no	no	no	0	no					no						no						admission ward	same	211
1337	44	male	yes	self-refferal	ambulance	yellow	ED physician	ED phycisian	collaps	no	no	no	no	no	no	no	no	no	0	low	no	no	no	yes	1	yes	neurology	pre-existing agreement	CT-cerebrum	yes	no						no						home	same	153
1338	50	male	yes	general practitioner	ambulatory	yellow	internal medicine	specialist	malaise	no	no	yes	no	no	no	no	no	yes	1	low	no	no	no	no	0	no					no						no						home	same	102
1339	20	female	yes	self-refferal	ambulatory	yellow	ED physician	ED phycisian	traumatic injury	no	no	no	no	no	no	no	no	no	0	low	no	no	no	no	0	no					no						no						home	same	65
1340	21	female	yes	self-refferal	ambulatory	yellow	ED physician	ED phycisian	traumatic injury	no	no	no	no	no	no	no	no	no	0	low	no	no	no	no	0	no					no						no						home	same	149
1341	20	female	yes	self-refferal	ambulatory	green	ED physician	ED phycisian	traumatic injury	no	no	no	no	no	no	no	no	no	0	low	no	no	no	no	0	no					no						no						home	same	131
1342	2	female	no	general practitioner	ambulatory	yellow	other	specialist	malaise	no	no	no	no	no	no	no	no	no	0	low	no	no	no	no	0	no					no						no						outpatient follow-up	same	100
1343	13	female	no	specialist	ambulance	orange	other	specialist	headdache	no	no	no	no	no	no	no	no	no	0	low	no	no	no	yes	2	yes	intensive care	admission IC		yes	no	other	neurology	other		yes	no						admission ICU	same	105
1344	63	male	yes	self-refferal	ambulatory	yellow	ED physician	ED phycisian	chest pain	no	yes	no	no	no	no	no	no	no	0	low	no	no	no	yes	1	yes	cardiology	outpatient follow-up		yes	no						no						outpatient follow-up	same	148
1345	83	female	yes	specialist	ambulance	green	neurology	specialist	malaise	no	no	no	no	yes	no	no	no	no	3	low	no	no	no	yes	1	yes	internal medicine	other		yes	no						no						admission ward	same
1346	30	female	yes	general practitioner	ambulatory	orange	ED physician	ED phycisian	chest pain	no	no	no	no	no	no	no	no	no	0	low	no	no	no	no	0	no					no						no						home	same	148
1347	70	female	yes	general practitioner	ambulance	orange	other	specialist	dyspnea	yes	yes	no	no	no	no	no	no	no	1	low	no	no	no	yes	1	yes	cardiology	other		yes	no						no						admission ward	same
1348	5	male	no	self-refferal	ambulatory	yellow	ED physician	ED phycisian	other	no	no	no	no	no	no	no	no	no	0	low	no	no	no	no	0	no					no						no						home	same	52
1349	67	female	yes	self-refferal	ambulance	yellow	ED physician	ED phycisian	traumatic injury	no	no	no	no	no	no	no	no	no	0	low	no	no	no	yes	1	yes	surgery	admission department		yes	no						no						admission ward	same
1350	34	female	yes	self-refferal	ambulance	green	ED physician	ED phycisian	abdominal pain	no	no	no	no	no	no	no	no	no	0	low	no	no	no	no	0	no					no						no						home	same	148
1351	28	male	yes	specialist	ambulatory	orange	internal medicine	specialist	abdominal pain	no	no	no	no	no	no	no	yes	no	2	low	no	no	no	no	0	no					no						no						admission ward	same
1352	13	female	no	self-refferal	ambulatory	blue	ED physician	ED phycisian	other	no	no	no	no	no	no	no	no	no	0	low	no	no	no	no	0	no					no						no						home	same	32
1353	34	female	yes	specialist	ambulatory	green	ED physician	ED phycisian	traumatic injury	no	no	no	no	no	no	no	no	no	0	low	no	no	no	no	0	no					no						no						outpatient follow-up	same	56
1354	48	female	yes	self-refferal	ambulance	yellow	ED physician	ED phycisian	other	no	no	no	no	no	no	no	no	no	0	low	no	no	no	yes	1	yes	other	exclusion diagnosis		no	no						no						outpatient follow-up	next
1355	16	male	no	specialist	ambulatory	green	ED physician	ED phycisian	traumatic injury	no	no	no	no	no	no	no	no	no	0	low	no	no	no	no	0	no					no						no						home	same	82
1356	62	female	yes	general practitioner	ambulance	orange	other	specialist	dyspnea	no	yes	yes	no	no	no	no	no	yes	1	low	no	no	no	no	0	no					no						no						admission ward	same	217
1357	11	male	no	self-refferal	ambulance	yellow	ED physician	ED phycisian	other	no	no	no	no	no	no	no	no	no	0	low	no	no	no	no	0	no					no						no						admission ward	same	96
1358	64	male	yes	general practitioner	ambulatory	green	internal medicine	specialist	traumatic injury	no	yes	no	no	no	no	no	no	no	2	low	no	no	no	no	0	no					no						no						home	same	171
1359	73	female	yes	general practitioner	ambulatory	orange	ED physician	ED phycisian	traumatic injury	yes	yes	no	no	no	no	no	no	no	0	low	no	no	no	no	0	no					no						no						outpatient follow-up	same	103
1360	66	female	yes	specialist	ambulatory	yellow	cardiology	specialist	palpitations	yes	no	no	no	no	no	no	no	no	0	low	no	no	no	yes	1	yes	emergency physician	pre-existing agreement	cardioversion	yes	no						no						outpatient follow-up	same	211
1361	48	female	yes	general practitioner	ambulance	orange	cardiology	specialist	chest pain	no	no	no	yes	no	no	no	no	no	0	low	no	no	no	no	0	no					no						no						home	same	224
1362	34	female	yes	self-refferal	ambulance	green	ED physician	ED phycisian	traumatic injury	no	no	no	no	no	no	yes	no	no	0	low	no	no	no	no	0	no					no						no						outpatient follow-up	same	106
1363	67	male	yes	general practitioner	ambulance	orange	cardiology	specialist	collaps	yes	yes	no	no	no	no	no	no	no	3	low	no	no	no	no	0	no					no						no						admission ward	same	208
1364	2	female	no	self-refferal	ambulatory	green	ED physician	ED phycisian	other	no	no	no	no	no	no	no	no	no	0	low	no	no	no	no	0	no					no						no						home	same	32
1365	75	female	yes	general practitioner	ambulance	yellow	neurology	specialist	malaise	no	no	no	no	no	no	no	yes	no	2	low	no	no	no	no	0	no					no						no						home	same	79
1366	67	female	yes	general practitioner	ambulance	orange	cardiology	specialist	chest pain	no	no	no	no	no	no	no	no	yes	0	low	no	no	no	no	0	no					no						no						admission ward	same	104
1367	29	male	yes	general practitioner	ambulatory	orange	cardiology	specialist	chest pain	no	no	no	no	no	no	no	yes	yes	1	low	no	no	no	no	0	no					no						no						outpatient follow-up	same	187
1368	15	male	no	specialist	ambulatory	green	ED physician	ED phycisian	traumatic injury	no	no	no	no	no	no	no	no	no	0	low	no	no	no	no	0	no					no						no						outpatient follow-up	same	64
1369	30	male	yes	self-refferal	ambulance	orange	internal medicine	specialist	other	no	no	no	no	no	no	no	no	no	0	low	no	no	no	no	0	no					no						no						home	same	116
1370	56	female	yes	general practitioner	ambulatory	yellow	internal medicine	specialist	malaise	no	no	no	no	no	no	no	no	no	0	low	no	no	no	no	0	no					no						no						admission ward	same	202
1371	70	female	yes	general practitioner	ambulatory	green	other	specialist	dyspnea	no	no	no	no	no	no	no	no	yes	1	low	no	no	no	no	0	no					no						no						outpatient follow-up	same	160
1372	67	female	yes	specialist	ambulatory	orange	internal medicine	specialist	traumatic injury	yes	no	no	no	no	no	no	yes	no	3	low	no	yes	no	yes	1	yes	surgery	other		no	no						no						admission ward	same	104
1373	24	male	yes	self-refferal	ambulatory	green	ED physician	ED phycisian	other	no	no	no	no	no	no	no	no	no	0	low	no	no	no	no	0	no					no						no						home	same	78
1374	53	male	yes	specialist	ambulatory	green	cardiology	specialist	malaise	no	no	no	no	no	no	no	no	no	1	low	no	no	no	no	0	no					no						no						admission ward	same	140
1375	13	female	no	self-refferal	ambulatory	yellow	ED physician	ED phycisian	traumatic injury	no	no	no	no	no	no	no	no	no	0	low	no	no	no	no	0	no					no						no						home	same	67
1376	17	male	yes	general practitioner	ambulatory	yellow	other	specialist	dyspnea	no	no	no	no	no	no	no	no	no	0	low	no	no	no	no	0	no					no						no						home	same	105
1377	56	male	yes	self-refferal	ambulatory	orange	ED physician	ED phycisian	chest pain	no	no	yes	no	no	no	no	no	no	1	low	no	no	no	yes	1	yes	cardiology	exclusion diagnosis	ACS	no	no						no						outpatient follow-up	same	113
1378	23	female	yes	self-refferal	ambulatory	yellow	ED physician	ED phycisian	traumatic injury	no	no	no	no	no	no	no	no	no	0	low	no	no	no	no	0	no					no						no						home	same	44
1379	46	female	yes	general practitioner	ambulatory	green	surgery	specialist	abdominal pain	no	no	no	no	no	no	no	no	no	1	low	no	no	no	no	0	no					no						no						home	same	134
1380	72	male	yes	self-refferal	ambulance	yellow	ED physician	ED phycisian	palpitations	yes	no	no	no	no	no	no	no	no	2	low	no	no	no	yes	1	yes	cardiology	specific procedure	read-out of ICD	yes	no						no						admission ward	same	174
1381	75	female	yes	general practitioner	ambulatory	orange	other	specialist	abdominal pain	no	no	no	no	no	yes	no	no	no	3	low	no	no	no	no	0	no					no						no						admission ward	same	134
1382	20	female	yes	specialist	ambulatory	orange	other	specialist	other	no	no	no	no	no	no	no	no	no	0	low	no	no	no	no	0	no					no						no						home	same	103
1383	58	male	yes	specialist	ambulatory	yellow	cardiology	specialist	palpitations	no	no	no	no	no	no	no	no	no	0	low	no	no	no	no	0	no					no						no						outpatient follow-up	same	139
1384	50	female	yes	specialist	ambulatory	yellow	other	specialist	traumatic injury	no	yes	no	no	no	no	no	no	no	0	low	no	no	no	no	0	no					no						no						outpatient follow-up	same	123
1385	81	male	yes	general practitioner	ambulance	yellow	internal medicine	specialist	malaise	no	no	no	yes	no	no	no	no	no	2	low	no	no	no	no	0	no					no						no						admission ward	same	109
1386	0	male	no	general practitioner	ambulatory	orange	other	specialist	malaise	no	no	no	no	no	no	no	no	no	0	low	no	no	no	no	0	no					no						no						admission ward	same	222
1387	16	male	no	general practitioner	ambulatory	orange	other	specialist	other	no	no	no	no	no	no	no	no	no	0	low	no	no	no	no	0	no					no						no						home	same	112
1388	89	female	yes	self-refferal	ambulance	orange	ED physician	ED phycisian	malaise	no	no	no	yes	no	no	no	no	no	1	low	no	no	yes	no	0	no					no						no						home	same
1389	34	male	yes	specialist	ambulatory	green	surgery	specialist	traumatic injury	no	no	no	no	no	no	no	yes	no	2	low	yes	yes	no	no	0	no					no						no						home	same	67
1390	1	male	no	general practitioner	ambulatory	green	neurology	specialist	other	no	no	no	no	no	no	no	no	no	0	low	no	no	no	no	0	no					no						no						home	same	84
1391	12	female	no	specialist	ambulatory	green	ED physician	ED phycisian	traumatic injury	no	no	no	no	no	no	no	no	no	0	low	no	no	no	no	0	no					no						no						outpatient follow-up	same	44
1392	1	female	no	general practitioner	ambulatory	yellow	other	specialist	dyspnea	no	no	no	no	no	no	no	no	no	0	low	no	no	no	no	0	no					no						no						home	same	175
1393	53	female	yes	specialist	ambulatory	yellow	internal medicine	specialist	abdominal pain	no	no	no	no	no	no	no	yes	no	6	high	no	no	no	no	0	no					no						no						admission ward	same
1394	66	male	yes	specialist	ambulatory	yellow	internal medicine	specialist	abdominal pain	yes	no	no	no	yes	no	no	yes	no	3	low	no	no	no	no	0	no					no						no						admission ward	same	89
1395	55	female	yes	specialist	ambulatory	yellow	ED physician	ED phycisian	traumatic injury	no	no	no	yes	no	no	no	no	no	0	low	no	no	no	yes	1	yes	other	other		yes	no						no						outpatient follow-up	same	78
1396	64	female	yes	general practitioner	ambulatory	green	other	specialist	other	no	no	no	no	no	no	no	no	no	0	low	no	no	no	no	0	no					no						no						outpatient follow-up	same	95
1397	86	male	yes	general practitioner	ambulatory	yellow	internal medicine	specialist	other	yes	yes	no	no	no	no	yes	no	no	2	low	no	no	no	no	0	no					no						no						admission ward	same	215
1398	63	male	yes	specialist	ambulance	orange	neurology	specialist	dyspnea	no	yes	no	no	no	no	no	yes	no	7	high	no	no	no	yes	2	yes	internal medicine	admission department		yes	no	internal medicine	intensive care	admission IC		yes	no						admission ICU	same	81
1399	13	female	no	self-refferal	ambulatory	green	ED physician	ED phycisian	other	no	no	yes	no	no	no	no	no	no	1	low	no	no	no	yes	1	yes	neurology	other		yes	no						no						outpatient follow-up	same	361
1400	12	female	no	self-refferal	ambulance	red	ED physician	ED phycisian	other	no	no	no	yes	no	no	no	no	no	2	low	no	no	yes	no	0	no					no						no						admission ward	same	198
1401	53	male	yes	self-refferal	ambulance	yellow	ED physician	ED phycisian	collaps	yes	no	no	no	no	no	no	no	no	1	low	no	no	no	no	0	no					no						no						home	same	139
1402	81	male	yes	self-refferal	ambulance	orange	ED physician	ED phycisian	collaps	yes	yes	no	no	no	no	no	no	no	1	low	no	no	no	yes	1	yes	cardiology	specific procedure	read-out of ICD	yes	no						no						admission ward	same	193
1403	37	male	yes	self-refferal	ambulance	yellow	ED physician	ED phycisian	other	no	no	no	no	no	no	no	no	no	0	low	no	no	no	yes	1	yes	other	specific procedure	GI endoscopy	yes	no						no						admission ward	same
1404	81	female	yes	general practitioner	ambulance	orange	internal medicine	specialist	other	no	yes	no	yes	yes	no	yes	no	no	4	high	yes	yes	no	no	0	no					no						no						admission ward	same	275
1405	38	male	yes	self-refferal	ambulatory	yellow	ED physician	ED phycisian	other	no	no	no	no	no	no	no	no	no	0	low	no	no	no	no	0	no					no						no						home	same	83
1406	66	male	yes	general practitioner	ambulance	orange	internal medicine	specialist	malaise	no	no	no	no	no	no	no	yes	no	8	high	no	no	no	yes	2	missed	other				no	internal medicine	other				no						admission ward	same	184
1407	60	female	yes	specialist	ambulatory	yellow	other	specialist	other	no	yes	no	no	no	no	no	yes	no	2	low	no	no	no	no	0	no					no						no						admission ward	same
1408	21	female	yes	self-refferal	ambulatory	green	ED physician	ED phycisian	traumatic injury	no	no	no	no	no	no	no	no	no	0	low	yes	yes	no	no	0	no					no						no						home	same	96
1409	10	male	no	specialist	ambulatory	yellow	ED physician	ED phycisian	abdominal pain	no	no	no	no	no	no	no	no	no	0	low	no	no	no	yes	1	yes	surgery	other		yes	no						no						admission ward	same	324
1410	57	male	yes	self-refferal	ambulance	orange	ED physician	ED phycisian	chest pain	yes	yes	no	no	no	no	no	no	no	2	low	no	no	no	yes	1	yes	cardiology	exclusion diagnosis	ACS	no	no						no						home	same	156
1411	56	male	yes	self-refferal	ambulance	orange	ED physician	ED phycisian	malaise	no	yes	no	no	no	no	no	no	no	0	low	no	no	no	yes	1	yes	internal medicine	admission department		yes	no						no						admission ward	same	210
1412	80	male	yes	general practitioner	ambulance	orange	cardiology	specialist	dyspnea	yes	no	no	no	no	no	no	no	no	2	low	no	no	no	yes	2	yes	other	other		no	no	cardiology	intensive care	admission IC		no	no						admission ward	same	193
1413	66	male	yes	specialist	ambulatory	yellow	cardiology	specialist	traumatic injury	yes	no	no	no	no	no	no	no	no	1	low	no	no	no	no	0	no					no						no						outpatient follow-up	same	66
1414	36	male	yes	self-refferal	ambulance	red	ED physician	ED phycisian	traumatic injury	no	no	no	no	no	no	no	yes	no	2	low	no	no	yes	no	0	no					no						no						admission ward	same	3
1415	78	male	yes	general practitioner	ambulance	yellow	internal medicine	specialist	malaise	yes	yes	no	no	yes	no	no	yes	no	2	low	no	no	no	no	0	no					no						no						admission ward	next
1416	83	male	yes	general practitioner	ambulance	yellow	internal medicine	specialist	other	no	yes	no	no	no	no	no	no	no	2	low	no	no	no	no	0	no					no						no						admission ward	same	249
1417	21	male	yes	self-refferal	ambulatory	yellow	ED physician	ED phycisian	traumatic injury	no	no	yes	no	no	no	no	no	no	1	low	no	no	no	no	0	no					no						no						home	same
1418	59	male	yes	general practitioner	ambulatory	green	internal medicine	specialist	dyspnea	no	no	no	no	no	no	no	yes	no	2	low	no	no	no	no	0	no					no						no						home	same	281
1419	36	female	yes	general practitioner	ambulatory	yellow	ED physician	ED phycisian	abdominal pain	no	no	no	no	no	no	no	no	no	0	low	no	no	no	no	0	no					no						no						home	same	179
1420	38	female	yes	general practitioner	ambulatory	yellow	other	specialist	dyspnea	no	no	no	no	no	no	no	no	no	0	low	no	no	no	no	0	no					no						no						home	same
1421	59	female	yes	specialist	ambulatory	green	ED physician	ED phycisian	traumatic injury	no	no	no	no	no	no	no	yes	no	2	low	no	no	no	no	0	no					no						no						outpatient follow-up	same
1422	0	female	no	general practitioner	ambulatory	green	other	specialist	malaise	no	no	no	no	no	no	no	no	no	0	low	no	no	no	no	0	no					no						no						home	same	99
1423	2	male	no	general practitioner	ambulatory	orange	other	specialist	malaise	no	no	no	no	no	no	no	no	no	0	low	no	no	no	no	0	no					no						no						admission ward	same	176
1424	70	female	yes	specialist	ambulatory	orange	other	specialist	collaps	yes	yes	yes	no	no	no	no	yes	no	3	low	no	no	no	no	0	no					no						no						admission ward	same	168
1425	68	male	yes	self-refferal	ambulance	green	ED physician	ED phycisian	malaise	yes	no	no	no	no	no	no	no	no	1	low	no	no	no	yes	1	yes	cardiology	specific procedure	read-out of ICD	yes	no						no						home	same	180
1426	13	male	no	specialist	ambulatory	green	ED physician	ED phycisian	traumatic injury	no	no	no	no	no	no	no	no	no	0	low	no	no	no	no	0	no					no						no						outpatient follow-up	same	61
1427	7	male	no	general practitioner	ambulatory	yellow	ED physician	ED phycisian	traumatic injury	no	no	no	no	no	no	no	no	no	0	low	no	no	no	no	0	no					no						no						outpatient follow-up	same	65
1428	69	male	yes	self-refferal	ambulance	red	ED physician	ED phycisian	malaise	no	no	no	no	no	no	no	no	no	0	low	no	no	yes	no	0	no					no						no						admission ICU	same	46
1429	48	female	yes	self-refferal	ambulance	yellow	ED physician	ED phycisian	abdominal pain	yes	no	no	no	no	no	no	no	no	0	low	no	no	no	no	0	no					no						no						home	same	99
1430	73	male	yes	specialist	ambulatory	green	internal medicine	specialist	other	yes	yes	no	no	no	no	yes	no	no	2	low	no	no	no	no	0	no					no						no						admission ward	same
1431	16	male	no	self-refferal	ambulatory	yellow	ED physician	ED phycisian	traumatic injury	no	no	no	no	no	no	no	no	no	0	low	no	no	no	no	0	no					no						no						outpatient follow-up	same	59
1432	42	male	yes	specialist	ambulatory	orange	internal medicine	specialist	chest pain	no	no	no	no	no	no	no	no	no	0	low	no	no	no	no	0	no					no						no						admission ward	next
1433	76	male	yes	general practitioner	ambulatory	orange	surgery	specialist	abdominal pain	no	no	no	no	no	no	no	yes	no	2	low	no	no	no	yes	1	missed	internal medicine				no						no						admission ward	next
1434	79	male	yes	general practitioner	ambulance	yellow	neurology	specialist	other	yes	no	no	yes	no	no	no	no	no	0	low	no	no	no	yes	2	yes	emergency physician	pre-existing agreement	trauma screening	yes	no	emergency physician	cardiology	admission department		yes	no						admission ward	next
